# Supplementary material for: Biomimics of [FeFe]-hydrogenases incorporating redox-active ligands: synthesis, redox properties and spectroelectrochemistry of diiron-dithiolate complexes with ferrocenyl-diphosphines as Fe4S4 surrogates
Source: Royal Society of Chemistry journal article supplement (doi:10.1039/d2dt00419d), 2022-01-01
Supplement: d2dt00419d1.pdf [file d2dt00419d1.pdf]

# **Biomimics of [FeFe]-hydrogenases incorporating redox-active ligands: Synthesis, redox and spectroelectrochemistry of diiron-dithiolate complexes with ferrocenyl-diphosphines as Fe<sub>4</sub>S<sub>4</sub> surrogates**

**Georgia Orton<sup>a</sup>, Shishir Ghosh<sup>a,b</sup>, Lucy Alker<sup>b</sup>, Jagodish C. Sarker<sup>a</sup>, David Pugh<sup>a</sup>, Michael G. Richmond<sup>c</sup>, František Hartl<sup>d</sup> and Graeme Hogarth<sup>a\*</sup>,**

<sup>a</sup>*Department of Chemistry, King's College London, 7 Trinity Street, London, SE1 1DB, U.K.*

<sup>b</sup>*Department of Chemistry, University College London, 20 Gordon Street, London, WC1H 0AJ, U.K.*

<sup>c</sup> *Department of Chemistry, University of North Texas, 1155 Union Circle, Box 305070, Denton, Texas 76203, USA*

<sup>d</sup> *Department of Chemistry, University of Reading, Whiteknights, Reading RG6 6AD, U.K.*

## **Electronic supplementary information**

**Fig. S1** CV of **1** in MeCN (1 mM solution, supporting electrolyte [NBu<sub>4</sub>][PF<sub>6</sub>], scan rate 0.1 Vs<sup>-1</sup>, glassy carbon electrode, potential vs Fc<sup>+/0</sup>) – CV showing peak potentials on the figure (Top); CV without showing peak potentials (Bottom) **p2**

**Fig. S2** Scan rate dependence of the oxidation features [at 0.08 V (a) and at 0.72 V (b)] features in the cyclic voltamograms of **1** in MeCN (1 mM solution, supporting electrolyte [NBu<sub>4</sub>][PF<sub>6</sub>], glassy carbon electrode, potential vs Fc<sup>+/0</sup>) **p3**

**Fig. S3** CV of **1** in CH<sub>2</sub>Cl<sub>2</sub> at scan rate 0.1 V/s (1mM solution, supporting electrolyte [NBu<sub>4</sub>][PF<sub>6</sub>], glassy carbon electrode, potential vs Fc<sup>+/0</sup>). **p4**

**Fig. S4.** CVs of **4c** in MeCN at various scan rates (1mM solution, supporting electrolyte [NBu<sub>4</sub>][PF<sub>6</sub>], glassy carbon electrode, potential vs Fc<sup>+/0</sup>). **p4**

**Fig. S5** CVs of **2** in the absence and presence of varying molar equivalents of CF<sub>3</sub>CO<sub>2</sub>H (1 mM solution in CH<sub>2</sub>Cl<sub>2</sub>, supporting electrolyte [NBu<sub>4</sub>][PF<sub>6</sub>], scan rate 0.1 V s<sup>-1</sup>, glassy carbon electrode, potential vs. Fc<sup>\*+/0</sup>) **p5**

**Fig. S6.** Alternative reaction pathway for proton-reduction catalysis by **1** **p5**

**Fig. S7** spectrum in CH<sub>2</sub>Cl<sub>2</sub> of **1** (black), after addition of excess [TA][PF<sub>6</sub>] (purple), followed by addition of H<sub>2</sub> (red) **p65**

**Fig. S8** IR spectrum in CH<sub>2</sub>Cl<sub>2</sub> of **2** (black), after addition of excess [TA][PF<sub>6</sub>] (purple), followed by addition of H<sub>2</sub> (red) **p6**

Crystal data and structure refinement for **1** **pp7-16**

Crystal data and structure refinement for **3** **pp17-25**

Crystal data and structure refinement for **4a** **pp26-33**

Crystal data and structure refinement for **4c** **pp34-41**

Computational Details **pp42-60**

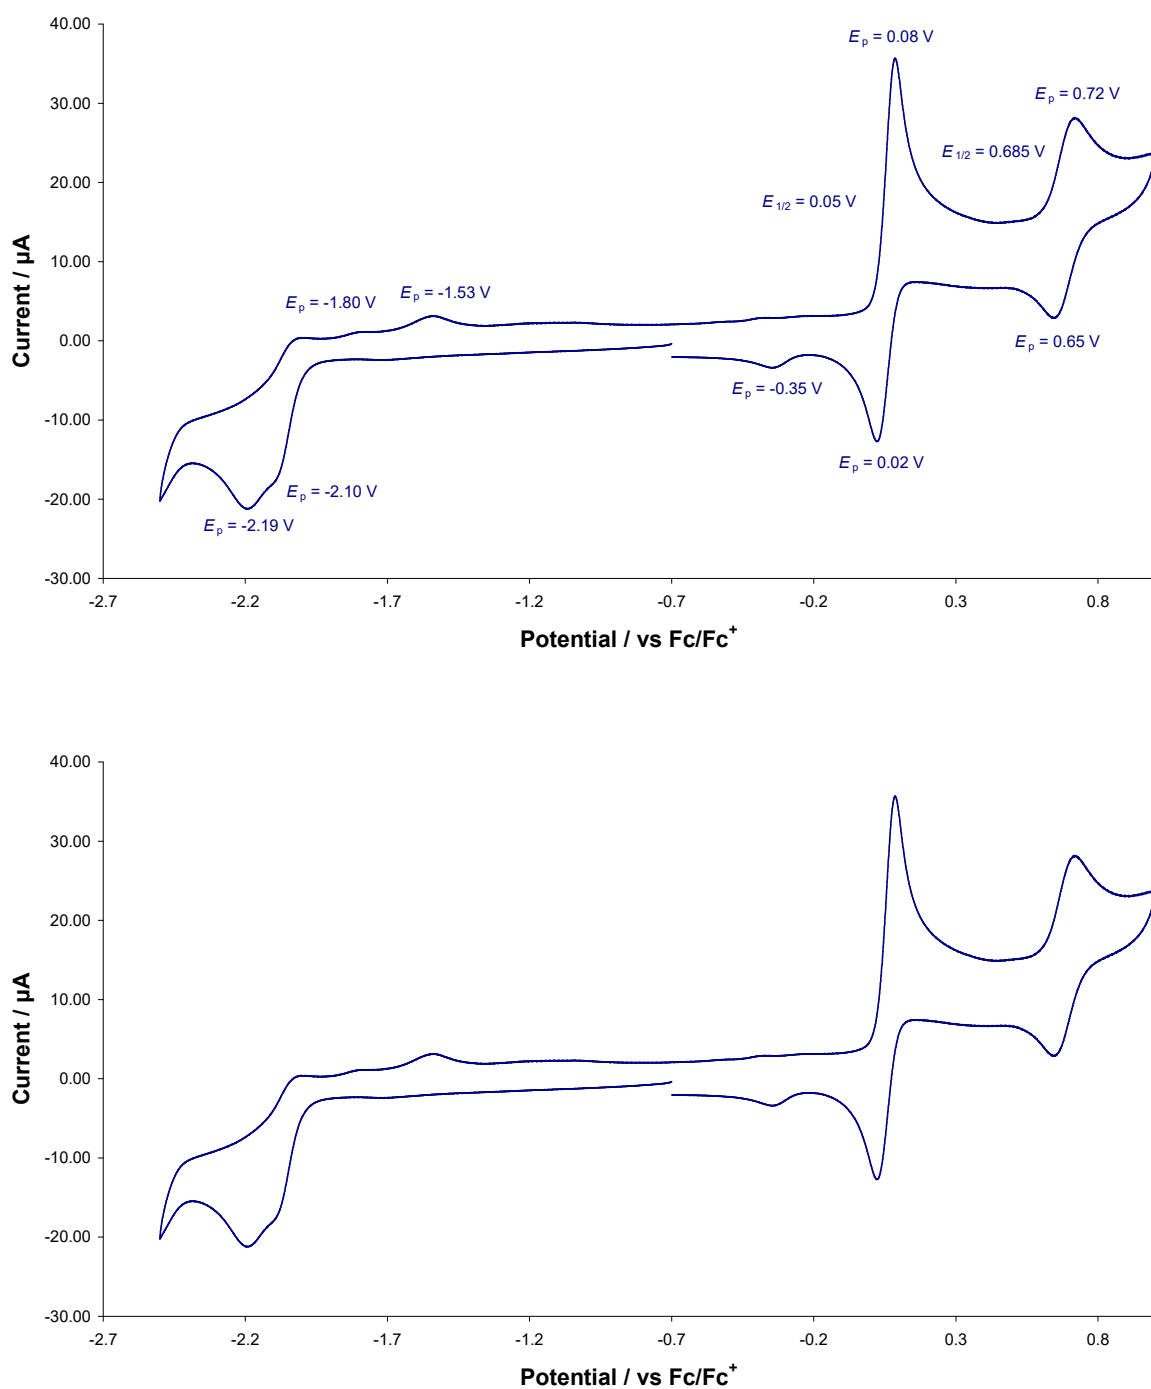

**Fig. S1** CV of **1** in MeCN (1 mM solution, supporting electrolyte [NBu<sub>4</sub>][PF<sub>6</sub>], scan rate 0.1 Vs<sup>-1</sup>, glassy carbon electrode, potential vs Fc<sup>+</sup>/Fc) – CV showing peak potentials on the figure (Top); CV without showing peak potentials (Bottom)

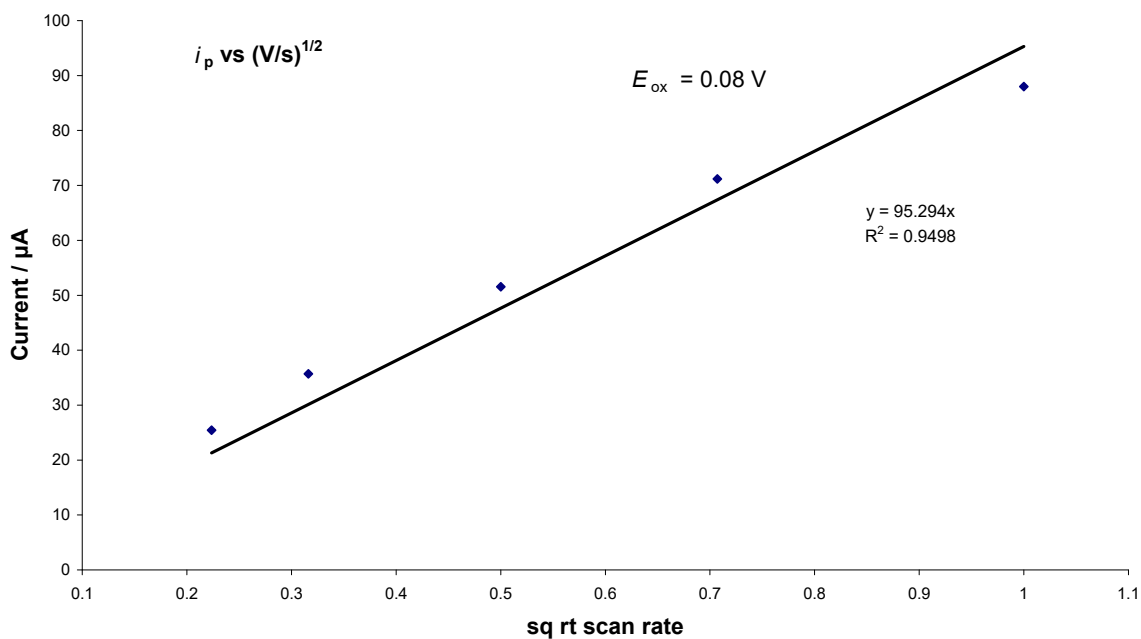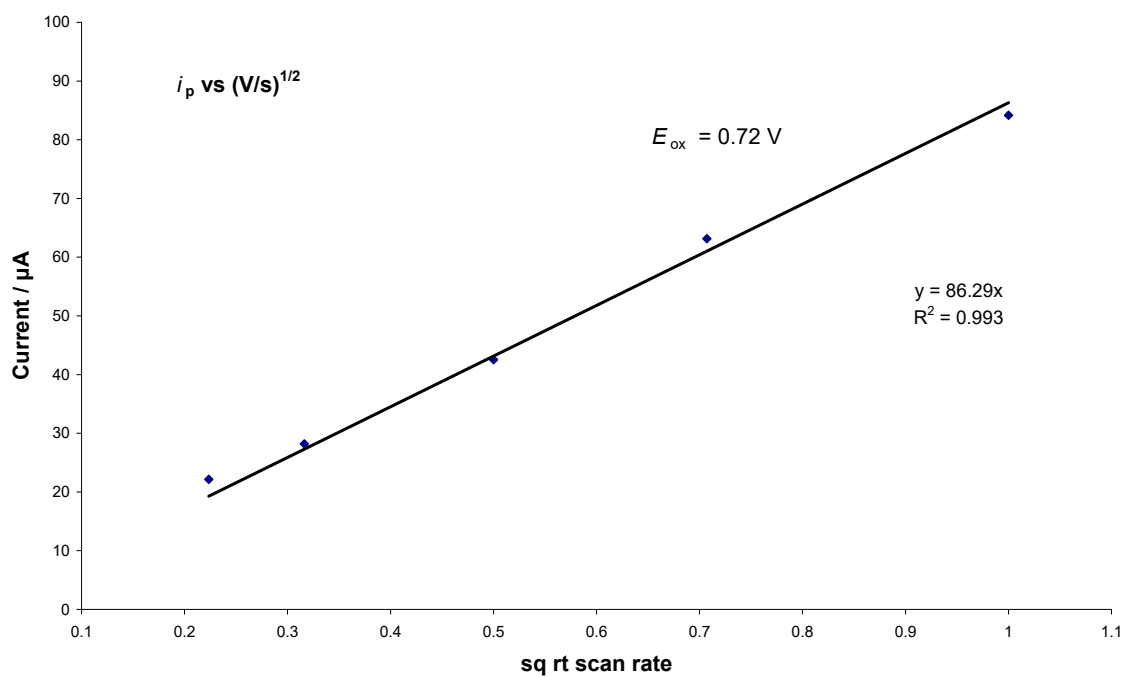

**Fig. S2** Scan rate dependence of the oxidation features [at 0.08 V (a) and at 0.72 V (b)] features in the cyclic voltamograms of **1** in MeCN (1 mM solution, supporting electrolyte  $[NBu_4][PF_6]$ , glassy carbon electrode, potential vs  $Fc^+/Fc$ )

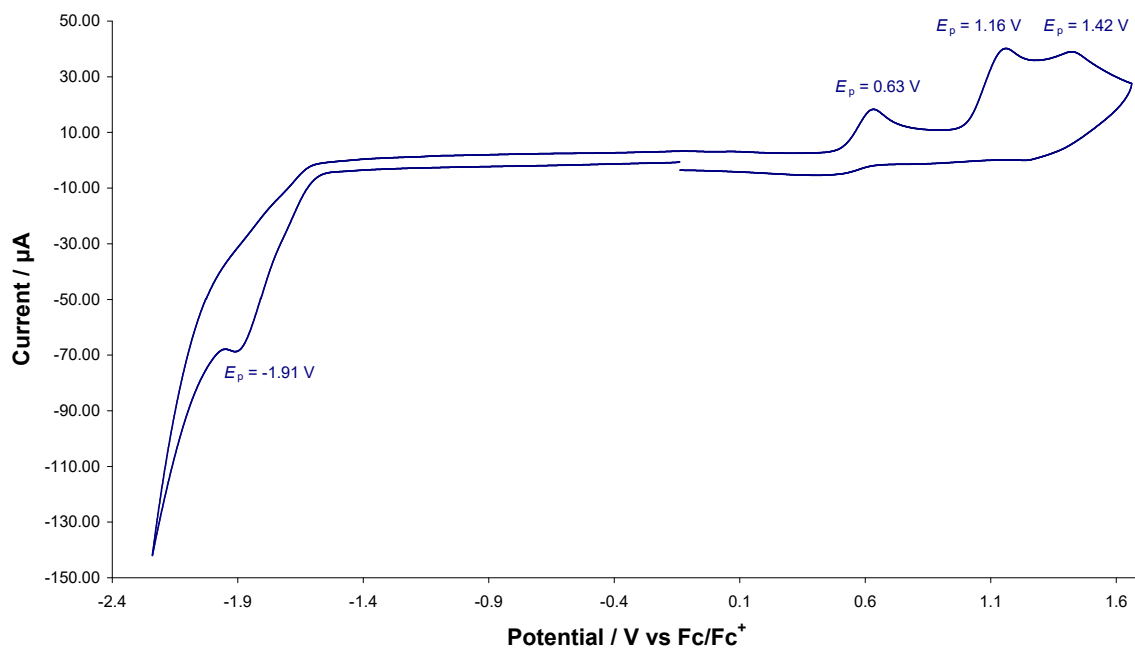

**Fig. S3** CV of **1** in  $\text{CH}_2\text{Cl}_2$  at scan rate 0.1 V/s (1mM solution, supporting electrolyte  $[\text{NBu}_4][\text{PF}_6]$ , glassy carbon electrode, potential vs  $\text{Fc}^+/\text{Fc}$ ).

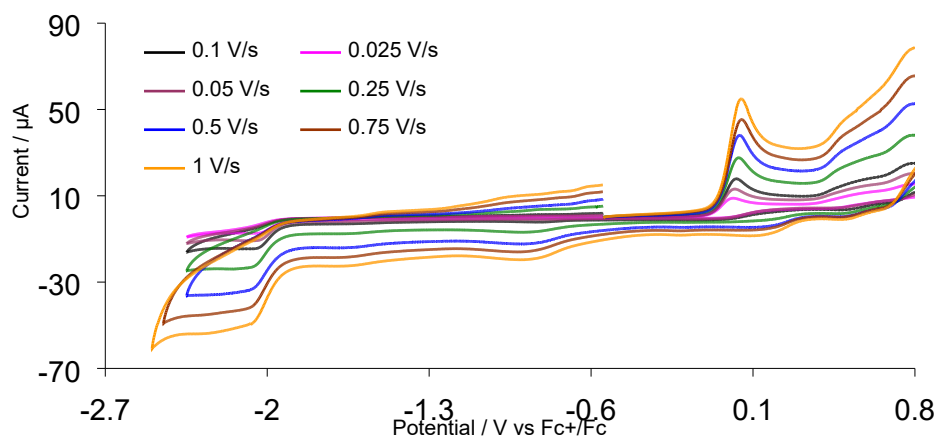

**Fig. S4.** CVs of **4c** in MeCN at various scan rates (1mM solution, supporting electrolyte  $[\text{NBu}_4][\text{PF}_6]$ , glassy carbon electrode, potential vs  $\text{Fc}^+/\text{Fc}$ ).

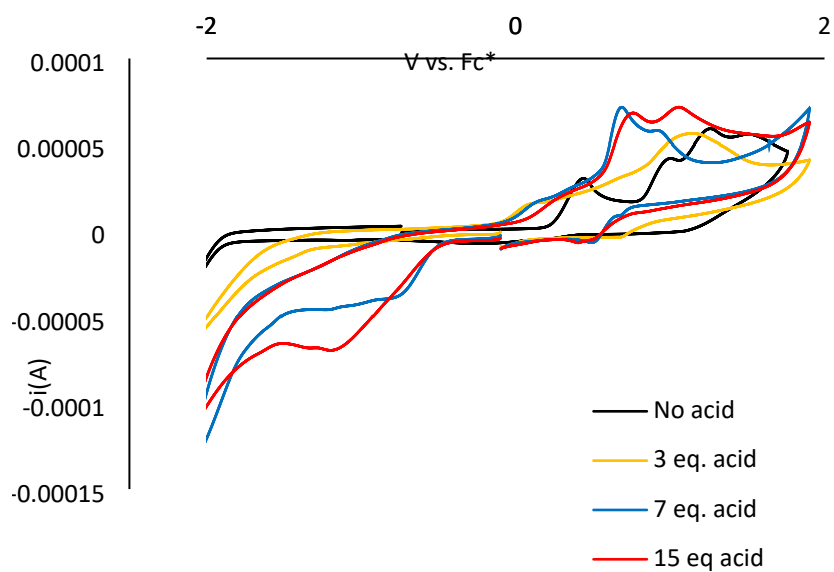

**Fig. S5** CVs of **2** in the absence and presence of varying molar equivalents of  $\text{CF}_3\text{CO}_2\text{H}$  (1 mM solution in  $\text{CH}_2\text{Cl}_2$ , supporting electrolyte  $[\text{NBu}_4][\text{PF}_6]$ , scan rate  $0.1 \text{ V s}^{-1}$ , glassy carbon electrode, potential vs.  $\text{Fc}^{*/0}$ )

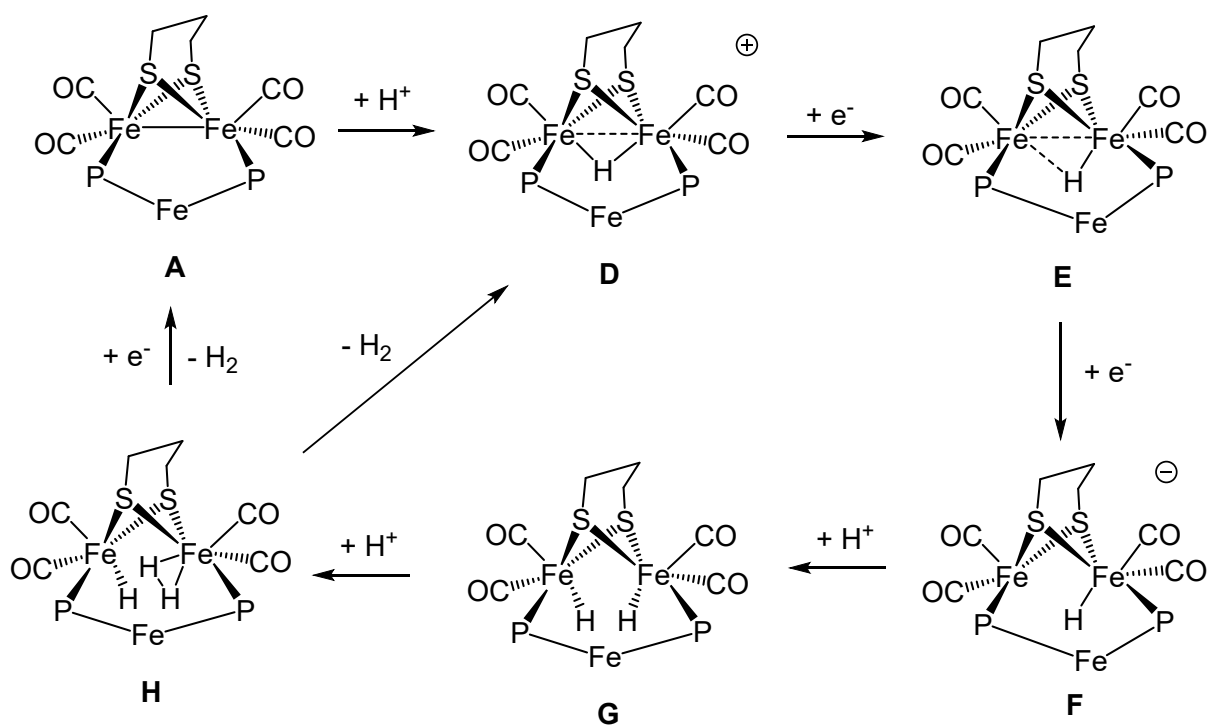

**Fig. S6.** Alternative reaction pathway for proton-reduction catalysis by **1**

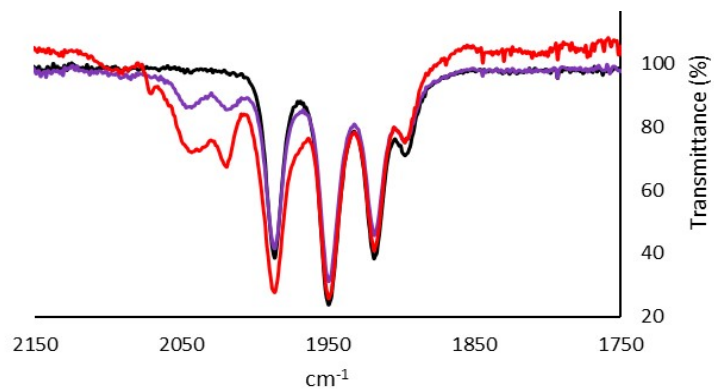

**Fig. S7** spectrum in  $\text{CH}_2\text{Cl}_2$  of **1** (black), after addition of excess  $[\text{TA}][\text{PF}_6]$  (purple), followed by addition of  $\text{H}_2$  (red)

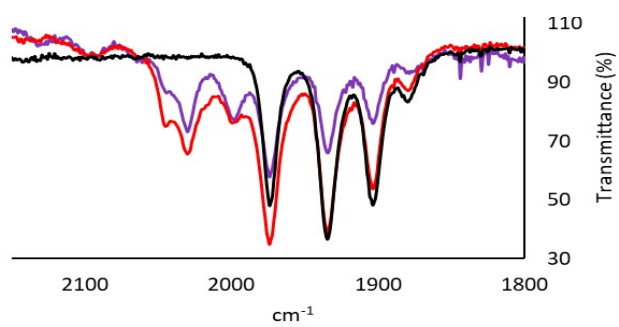

**Fig. S8** IR spectrum in  $\text{CH}_2\text{Cl}_2$  of **2** (black), after addition of excess  $[\text{TA}][\text{PF}_6]$  (purple), followed by addition of  $\text{H}_2$  (red)

## Crystal data and structure refinement for **1**

|                                        |                                                                                                   |                        |  |
|----------------------------------------|---------------------------------------------------------------------------------------------------|------------------------|--|
| Identification code                    | str0562                                                                                           |                        |  |
| Chemical formula                       | C <sub>41.50</sub> H <sub>35</sub> ClFe <sub>3</sub> O <sub>4</sub> P <sub>2</sub> S <sub>2</sub> |                        |  |
| Formula weight                         | 926.75                                                                                            |                        |  |
| Temperature                            | 150(2) K                                                                                          |                        |  |
| Radiation, wavelength                  | MoK $\alpha$ , 0.71073 Å                                                                          |                        |  |
| Crystal system, space group            | triclinic, P1bar                                                                                  |                        |  |
| Unit cell parameters                   | a = 9.7365(19) Å                                                                                  | $\alpha$ = 99.609(3)°  |  |
|                                        | b = 13.149(3) Å                                                                                   | $\beta$ = 94.376(3)°   |  |
|                                        | c = 16.654(3) Å                                                                                   | $\gamma$ = 111.343(3)° |  |
| Cell volume                            | 1936.1(7) Å <sup>3</sup>                                                                          |                        |  |
| Z                                      | 2                                                                                                 |                        |  |
| Calculated density                     | 1.588 g/cm <sup>3</sup>                                                                           |                        |  |
| Absorption coefficient $\mu$           | 1.411 mm <sup>-1</sup>                                                                            |                        |  |
| F(000)                                 | 944                                                                                               |                        |  |
| Crystal colour and size                | red, 0.38 × 0.32 × 0.16 mm <sup>3</sup>                                                           |                        |  |
| Data collection method                 | Bruker SMART APEX diffractometer                                                                  |                        |  |
|                                        | $\omega$ rotation with narrow frames                                                              |                        |  |
| $\theta$ range for data collection     | 2.59 to 28.35°                                                                                    |                        |  |
| Index ranges                           | h -12 to 12, k -17 to 17, l -21 to 21                                                             |                        |  |
| Completeness to $\theta = 26.00^\circ$ | 98.8 %                                                                                            |                        |  |
| Reflections collected                  | 16800                                                                                             |                        |  |
| Independent reflections                | 8886 ( $R_{\text{int}} = 0.0333$ )                                                                |                        |  |
| Reflections with $F^2 > 2\sigma$       | 8134                                                                                              |                        |  |
| Absorption correction                  | semi-empirical from equivalents                                                                   |                        |  |
| Min. and max. transmission             | 0.6161 and 0.8057                                                                                 |                        |  |
| Structure solution                     | Patterson synthesis                                                                               |                        |  |
| Refinement method                      | Full-matrix least-squares on $F^2$                                                                |                        |  |
| Weighting parameters a, b              | 0.0471, 0.7689                                                                                    |                        |  |
| Data / restraints / parameters         | 8886 / 0 / 511                                                                                    |                        |  |
| Final R indices [ $F^2 > 2\sigma$ ]    | R1 = 0.0345, wR2 = 0.0911                                                                         |                        |  |
| R indices (all data)                   | R1 = 0.0374, wR2 = 0.0929                                                                         |                        |  |
| Goodness-of-fit on $F^2$               | 1.049                                                                                             |                        |  |
| Largest and mean shift/su              | 0.000 and 0.000                                                                                   |                        |  |
| Largest diff. peak and hole            | 0.597 and -0.725 e Å <sup>-3</sup>                                                                |                        |  |

Atomic coordinates and equivalent isotropic displacement parameters (Å<sup>2</sup>)  
for str0562.  $U_{\text{eq}}$  is defined as one third of the trace of the orthogonalized  $U^{ij}$  tensor.

|       | x            | y            | z            | $U_{\text{eq}}$ |
|-------|--------------|--------------|--------------|-----------------|
| Fe(1) | 0.11524(3)   | 0.11104(2)   | 0.311588(15) | 0.01639(7)      |
| Fe(2) | 0.26805(3)   | 0.32140(2)   | 0.313764(15) | 0.01615(7)      |
| Fe(3) | 0.48739(3)   | 0.11629(2)   | 0.157848(16) | 0.02020(8)      |
| P(1)  | 0.20980(5)   | -0.01647(4)  | 0.27117(3)   | 0.01656(10)     |
| P(2)  | 0.46943(5)   | 0.36607(4)   | 0.24689(3)   | 0.01692(10)     |
| S(1)  | 0.04314(5)   | 0.25203(4)   | 0.35447(3)   | 0.02003(10)     |
| S(2)  | 0.32936(5)   | 0.21971(4)   | 0.39608(3)   | 0.01760(10)     |
| O(1)  | -0.12940(18) | -0.04843(14) | 0.37222(11)  | 0.0374(4)       |
| O(2)  | -0.04810(17) | 0.07670(14)  | 0.14822(9)   | 0.0313(3)       |
| O(3)  | 0.35984(18)  | 0.53477(13)  | 0.42898(10)  | 0.0315(3)       |
| O(4)  | 0.10390(19)  | 0.35568(16)  | 0.17251(11)  | 0.0403(4)       |
| C(1)  | -0.0279(2)   | 0.01244(17)  | 0.35069(13)  | 0.0243(4)       |

|       |             |              |             |           |
|-------|-------------|--------------|-------------|-----------|
| C(2)  | 0.0187(2)   | 0.09034(16)  | 0.21182(12) | 0.0223(4) |
| C(3)  | 0.3301(2)   | 0.45287(16)  | 0.38174(12) | 0.0212(4) |
| C(4)  | 0.1706(2)   | 0.34277(17)  | 0.22696(12) | 0.0241(4) |
| C(5)  | 0.0580(2)   | 0.28628(18)  | 0.46661(13) | 0.0264(4) |
| C(6)  | 0.1378(2)   | 0.23096(19)  | 0.51444(13) | 0.0266(4) |
| C(7)  | 0.2991(2)   | 0.26117(19)  | 0.50221(12) | 0.0255(4) |
| C(8)  | 0.3415(2)   | 0.17869(17)  | 0.11067(11) | 0.0236(4) |
| C(9)  | 0.4724(2)   | 0.26668(16)  | 0.15803(11) | 0.0210(4) |
| C(10) | 0.5978(2)   | 0.25979(18)  | 0.12045(13) | 0.0277(4) |
| C(11) | 0.5434(3)   | 0.16868(19)  | 0.05136(13) | 0.0331(5) |
| C(12) | 0.3867(3)   | 0.11901(18)  | 0.04522(12) | 0.0300(5) |
| C(13) | 0.6450(2)   | 0.09935(18)  | 0.23902(13) | 0.0264(4) |
| C(14) | 0.5238(2)   | 0.10651(16)  | 0.27831(11) | 0.0208(4) |
| C(15) | 0.3893(2)   | 0.01722(16)  | 0.23561(11) | 0.0187(4) |
| C(16) | 0.4315(2)   | -0.04598(17) | 0.17020(12) | 0.0238(4) |
| C(17) | 0.5883(2)   | 0.00573(19)  | 0.17232(13) | 0.0279(4) |
| C(18) | 0.2443(2)   | -0.09066(16) | 0.34981(12) | 0.0204(4) |
| C(19) | 0.2807(2)   | -0.18371(18) | 0.32642(14) | 0.0281(4) |
| C(20) | 0.3255(3)   | -0.2328(2)   | 0.38578(15) | 0.0350(5) |
| C(21) | 0.3364(2)   | -0.1892(2)   | 0.46843(15) | 0.0332(5) |
| C(22) | 0.2988(2)   | -0.0980(2)   | 0.49268(13) | 0.0311(5) |
| C(23) | 0.2516(2)   | -0.04931(17) | 0.43338(12) | 0.0244(4) |
| C(24) | 0.0825(2)   | -0.12666(16) | 0.18788(12) | 0.0213(4) |
| C(25) | 0.0867(2)   | -0.11364(18) | 0.10648(13) | 0.0273(4) |
| C(26) | -0.0182(3)  | -0.1913(2)   | 0.04279(14) | 0.0374(5) |
| C(27) | -0.1306(3)  | -0.2814(2)   | 0.06056(17) | 0.0465(7) |
| C(28) | -0.1383(3)  | -0.2942(2)   | 0.14075(17) | 0.0416(6) |
| C(29) | -0.0319(2)  | -0.21772(18) | 0.20468(14) | 0.0288(4) |
| C(30) | 0.6614(2)   | 0.41833(16)  | 0.29947(11) | 0.0196(4) |
| C(31) | 0.6957(2)   | 0.39915(16)  | 0.37618(11) | 0.0204(4) |
| C(32) | 0.8438(2)   | 0.43491(18)  | 0.41173(13) | 0.0271(4) |
| C(33) | 0.9576(2)   | 0.49115(19)  | 0.37176(14) | 0.0292(4) |
| C(34) | 0.9251(2)   | 0.51325(19)  | 0.29583(14) | 0.0304(5) |
| C(35) | 0.7780(2)   | 0.47710(18)  | 0.25969(13) | 0.0270(4) |
| C(36) | 0.4801(2)   | 0.48705(16)  | 0.20207(12) | 0.0211(4) |
| C(37) | 0.5239(3)   | 0.59215(18)  | 0.25393(14) | 0.0307(5) |
| C(38) | 0.5261(3)   | 0.6840(2)    | 0.22224(17) | 0.0404(6) |
| C(39) | 0.4844(3)   | 0.6724(2)    | 0.13899(17) | 0.0412(6) |
| C(40) | 0.4420(3)   | 0.5691(2)    | 0.08706(15) | 0.0368(5) |
| C(41) | 0.4406(2)   | 0.47723(19)  | 0.11846(13) | 0.0283(4) |
| Cl(1) | 0.87963(11) | 0.42452(11)  | 0.03311(8)  | 0.0910(4) |
| C(50) | 1.0596(7)   | 0.5307(8)    | 0.0565(5)   | 0.078(3)  |

Bond lengths [Å] and angles [°] for str0562.

|             |            |             |           |
|-------------|------------|-------------|-----------|
| Fe(1)–C(2)  | 1.773(2)   | Fe(1)–C(1)  | 1.775(2)  |
| Fe(1)–P(1)  | 2.2256(6)  | Fe(1)–S(1)  | 2.2410(6) |
| Fe(1)–S(2)  | 2.2540(6)  | Fe(1)–Fe(2) | 2.6133(6) |
| Fe(2)–C(3)  | 1.765(2)   | Fe(2)–C(4)  | 1.786(2)  |
| Fe(2)–S(1)  | 2.2508(6)  | Fe(2)–S(2)  | 2.2565(6) |
| Fe(2)–P(2)  | 2.2679(6)  | Fe(3)–C(10) | 2.030(2)  |
| Fe(3)–C(15) | 2.0330(19) | Fe(3)–C(9)  | 2.035(2)  |
| Fe(3)–C(14) | 2.0440(19) | Fe(3)–C(11) | 2.049(2)  |
| Fe(3)–C(8)  | 2.050(2)   | Fe(3)–C(16) | 2.052(2)  |
| Fe(3)–C(12) | 2.061(2)   | Fe(3)–C(17) | 2.063(2)  |



|                   |            |                   |             |
|-------------------|------------|-------------------|-------------|
| Fe(3)–C(13)       | 2.065(2)   | P(1)–C(15)        | 1.8116(19)  |
| P(1)–C(24)        | 1.822(2)   | P(1)–C(18)        | 1.8378(19)  |
| P(2)–C(9)         | 1.813(2)   | P(2)–C(30)        | 1.8296(19)  |
| P(2)–C(36)        | 1.840(2)   | S(1)–C(5)         | 1.828(2)    |
| S(2)–C(7)         | 1.839(2)   | O(1)–C(1)         | 1.149(3)    |
| O(2)–C(2)         | 1.150(3)   | O(3)–C(3)         | 1.148(2)    |
| O(4)–C(4)         | 1.147(3)   | C(5)–C(6)         | 1.509(3)    |
| C(6)–C(7)         | 1.512(3)   | C(8)–C(12)        | 1.427(3)    |
| C(8)–C(9)         | 1.433(3)   | C(9)–C(10)        | 1.438(3)    |
| C(10)–C(11)       | 1.423(3)   | C(11)–C(12)       | 1.411(3)    |
| C(13)–C(14)       | 1.417(3)   | C(13)–C(17)       | 1.418(3)    |
| C(14)–C(15)       | 1.435(3)   | C(15)–C(16)       | 1.436(3)    |
| C(16)–C(17)       | 1.422(3)   | C(18)–C(23)       | 1.394(3)    |
| C(18)–C(19)       | 1.397(3)   | C(19)–C(20)       | 1.391(3)    |
| C(20)–C(21)       | 1.380(4)   | C(21)–C(22)       | 1.384(3)    |
| C(22)–C(23)       | 1.397(3)   | C(24)–C(29)       | 1.393(3)    |
| C(24)–C(25)       | 1.396(3)   | C(25)–C(26)       | 1.387(3)    |
| C(26)–C(27)       | 1.382(4)   | C(27)–C(28)       | 1.378(4)    |
| C(28)–C(29)       | 1.391(3)   | C(30)–C(31)       | 1.382(3)    |
| C(30)–C(35)       | 1.404(3)   | C(31)–C(32)       | 1.391(3)    |
| C(32)–C(33)       | 1.378(3)   | C(33)–C(34)       | 1.383(3)    |
| C(34)–C(35)       | 1.385(3)   | C(36)–C(41)       | 1.387(3)    |
| C(36)–C(37)       | 1.398(3)   | C(37)–C(38)       | 1.391(3)    |
| C(38)–C(39)       | 1.381(4)   | C(39)–C(40)       | 1.381(4)    |
| C(40)–C(41)       | 1.391(3)   | Cl(1)–C(50A)      | 1.760(6)    |
| Cl(1)–C(50)       | 1.762(8)   | C(50)–Cl(1A)      | 1.760(6)    |
| C(50)–C(50A)      | 2.004(17)  |                   |             |
| C(2)–Fe(1)–C(1)   | 98.41(9)   | C(2)–Fe(1)–P(1)   | 92.92(7)    |
| C(1)–Fe(1)–P(1)   | 90.64(7)   | C(2)–Fe(1)–S(1)   | 89.39(7)    |
| C(1)–Fe(1)–S(1)   | 94.15(7)   | P(1)–Fe(1)–S(1)   | 174.34(2)   |
| C(2)–Fe(1)–S(2)   | 142.40(7)  | C(1)–Fe(1)–S(2)   | 118.96(7)   |
| P(1)–Fe(1)–S(2)   | 90.77(2)   | S(1)–Fe(1)–S(2)   | 84.26(2)    |
| C(2)–Fe(1)–Fe(2)  | 91.95(7)   | C(1)–Fe(1)–Fe(2)  | 147.07(7)   |
| P(1)–Fe(1)–Fe(2)  | 120.10(2)  | S(1)–Fe(1)–Fe(2)  | 54.598(19)  |
| S(2)–Fe(1)–Fe(2)  | 54.638(15) | C(3)–Fe(2)–C(4)   | 102.38(9)   |
| C(3)–Fe(2)–S(1)   | 96.06(6)   | C(4)–Fe(2)–S(1)   | 85.65(7)    |
| C(3)–Fe(2)–S(2)   | 100.69(7)  | C(4)–Fe(2)–S(2)   | 155.55(7)   |
| S(1)–Fe(2)–S(2)   | 83.98(2)   | C(3)–Fe(2)–P(2)   | 94.75(6)    |
| C(4)–Fe(2)–P(2)   | 86.50(7)   | S(1)–Fe(2)–P(2)   | 167.79(2)   |
| S(2)–Fe(2)–P(2)   | 99.59(2)   | C(3)–Fe(2)–Fe(1)  | 139.61(6)   |
| C(4)–Fe(2)–Fe(1)  | 101.73(7)  | S(1)–Fe(2)–Fe(1)  | 54.248(14)  |
| S(2)–Fe(2)–Fe(1)  | 54.549(17) | P(2)–Fe(2)–Fe(1)  | 118.646(17) |
| C(10)–Fe(3)–C(15) | 157.78(8)  | C(10)–Fe(3)–C(9)  | 41.43(8)    |
| C(15)–Fe(3)–C(9)  | 122.57(8)  | C(10)–Fe(3)–C(14) | 120.36(8)   |
| C(15)–Fe(3)–C(14) | 41.22(7)   | C(9)–Fe(3)–C(14)  | 106.80(8)   |
| C(10)–Fe(3)–C(11) | 40.82(9)   | C(15)–Fe(3)–C(11) | 160.82(9)   |
| C(9)–Fe(3)–C(11)  | 69.10(8)   | C(14)–Fe(3)–C(11) | 155.82(9)   |
| C(10)–Fe(3)–C(8)  | 68.95(9)   | C(15)–Fe(3)–C(8)  | 109.36(8)   |
| C(9)–Fe(3)–C(8)   | 41.08(8)   | C(14)–Fe(3)–C(8)  | 125.12(8)   |
| C(11)–Fe(3)–C(8)  | 68.33(9)   | C(10)–Fe(3)–C(16) | 157.92(8)   |
| C(15)–Fe(3)–C(16) | 41.16(7)   | C(9)–Fe(3)–C(16)  | 160.12(8)   |
| C(14)–Fe(3)–C(16) | 68.44(8)   | C(11)–Fe(3)–C(16) | 123.32(8)   |
| C(8)–Fe(3)–C(16)  | 124.77(8)  | C(10)–Fe(3)–C(12) | 68.36(9)    |
| C(15)–Fe(3)–C(12) | 125.73(8)  | C(9)–Fe(3)–C(12)  | 68.84(8)    |

|                   |            |                   |            |
|-------------------|------------|-------------------|------------|
| C(14)–Fe(3)–C(12) | 162.47(9)  | C(11)–Fe(3)–C(12) | 40.17(10)  |
| C(8)–Fe(3)–C(12)  | 40.63(8)   | C(16)–Fe(3)–C(12) | 109.55(9)  |
| C(10)–Fe(3)–C(17) | 120.78(9)  | C(15)–Fe(3)–C(17) | 68.84(8)   |
| C(9)–Fe(3)–C(17)  | 157.48(9)  | C(14)–Fe(3)–C(17) | 67.89(8)   |
| C(11)–Fe(3)–C(17) | 106.30(9)  | C(8)–Fe(3)–C(17)  | 159.50(9)  |
| C(16)–Fe(3)–C(17) | 40.43(8)   | C(12)–Fe(3)–C(17) | 122.69(9)  |
| C(10)–Fe(3)–C(13) | 104.74(9)  | C(15)–Fe(3)–C(13) | 68.87(8)   |
| C(9)–Fe(3)–C(13)  | 121.70(8)  | C(14)–Fe(3)–C(13) | 40.34(8)   |
| C(11)–Fe(3)–C(13) | 120.15(9)  | C(8)–Fe(3)–C(13)  | 159.85(8)  |
| C(16)–Fe(3)–C(13) | 68.00(8)   | C(12)–Fe(3)–C(13) | 156.54(9)  |
| C(17)–Fe(3)–C(13) | 40.16(9)   | C(15)–P(1)–C(24)  | 103.61(9)  |
| C(15)–P(1)–C(18)  | 97.04(9)   | C(24)–P(1)–C(18)  | 104.39(9)  |
| C(15)–P(1)–Fe(1)  | 123.03(6)  | C(24)–P(1)–Fe(1)  | 110.71(7)  |
| C(18)–P(1)–Fe(1)  | 115.75(7)  | C(9)–P(2)–C(30)   | 101.97(9)  |
| C(9)–P(2)–C(36)   | 102.03(9)  | C(30)–P(2)–C(36)  | 98.93(9)   |
| C(9)–P(2)–Fe(2)   | 118.94(7)  | C(30)–P(2)–Fe(2)  | 123.22(6)  |
| C(36)–P(2)–Fe(2)  | 108.16(6)  | C(5)–S(1)–Fe(1)   | 112.16(7)  |
| C(5)–S(1)–Fe(2)   | 111.13(7)  | Fe(1)–S(1)–Fe(2)  | 71.154(19) |
| C(7)–S(2)–Fe(1)   | 112.58(7)  | C(7)–S(2)–Fe(2)   | 110.83(8)  |
| Fe(1)–S(2)–Fe(2)  | 70.81(2)   | O(1)–C(1)–Fe(1)   | 173.81(19) |
| O(2)–C(2)–Fe(1)   | 177.76(18) | O(3)–C(3)–Fe(2)   | 174.21(17) |
| O(4)–C(4)–Fe(2)   | 177.68(18) | C(6)–C(5)–S(1)    | 116.49(15) |
| C(5)–C(6)–C(7)    | 113.54(18) | C(6)–C(7)–S(2)    | 115.34(15) |
| C(12)–C(8)–C(9)   | 108.04(19) | C(12)–C(8)–Fe(3)  | 70.09(13)  |
| C(9)–C(8)–Fe(3)   | 68.88(11)  | C(8)–C(9)–C(10)   | 107.11(17) |
| C(8)–C(9)–P(2)    | 123.85(15) | C(10)–C(9)–P(2)   | 129.03(16) |
| C(8)–C(9)–Fe(3)   | 70.04(11)  | C(10)–C(9)–Fe(3)  | 69.12(12)  |
| P(2)–C(9)–Fe(3)   | 126.82(10) | C(11)–C(10)–C(9)  | 108.11(19) |
| C(11)–C(10)–Fe(3) | 70.30(12)  | C(9)–C(10)–Fe(3)  | 69.44(11)  |
| C(12)–C(11)–C(10) | 108.38(19) | C(12)–C(11)–Fe(3) | 70.37(12)  |
| C(10)–C(11)–Fe(3) | 68.88(12)  | C(11)–C(12)–C(8)  | 108.36(19) |
| C(11)–C(12)–Fe(3) | 69.46(13)  | C(8)–C(12)–Fe(3)  | 69.28(11)  |
| C(14)–C(13)–C(17) | 108.03(18) | C(14)–C(13)–Fe(3) | 69.03(11)  |
| C(17)–C(13)–Fe(3) | 69.85(12)  | C(13)–C(14)–C(15) | 108.69(17) |
| C(13)–C(14)–Fe(3) | 70.63(11)  | C(15)–C(14)–Fe(3) | 68.98(10)  |
| C(14)–C(15)–C(16) | 106.69(16) | C(14)–C(15)–P(1)  | 124.11(14) |
| C(16)–C(15)–P(1)  | 128.53(15) | C(14)–C(15)–Fe(3) | 69.80(11)  |
| C(16)–C(15)–Fe(3) | 70.12(11)  | P(1)–C(15)–Fe(3)  | 132.15(10) |
| C(17)–C(16)–C(15) | 108.24(18) | C(17)–C(16)–Fe(3) | 70.22(12)  |
| C(15)–C(16)–Fe(3) | 68.72(11)  | C(13)–C(17)–C(16) | 108.34(18) |
| C(13)–C(17)–Fe(3) | 69.99(12)  | C(16)–C(17)–Fe(3) | 69.35(12)  |
| C(23)–C(18)–C(19) | 118.76(18) | C(23)–C(18)–P(1)  | 121.55(15) |
| C(19)–C(18)–P(1)  | 119.30(15) | C(20)–C(19)–C(18) | 120.4(2)   |
| C(21)–C(20)–C(19) | 120.4(2)   | C(20)–C(21)–C(22) | 120.0(2)   |
| C(21)–C(22)–C(23) | 119.9(2)   | C(18)–C(23)–C(22) | 120.5(2)   |
| C(29)–C(24)–C(25) | 118.81(18) | C(29)–C(24)–P(1)  | 120.78(16) |
| C(25)–C(24)–P(1)  | 119.91(15) | C(26)–C(25)–C(24) | 121.0(2)   |
| C(27)–C(26)–C(25) | 119.4(2)   | C(28)–C(27)–C(26) | 120.4(2)   |
| C(27)–C(28)–C(29) | 120.5(2)   | C(28)–C(29)–C(24) | 119.9(2)   |
| C(31)–C(30)–C(35) | 118.91(18) | C(31)–C(30)–P(2)  | 122.09(14) |
| C(35)–C(30)–P(2)  | 118.97(15) | C(30)–C(31)–C(32) | 120.08(18) |
| C(33)–C(32)–C(31) | 120.62(19) | C(32)–C(33)–C(34) | 120.01(19) |
| C(33)–C(34)–C(35) | 119.7(2)   | C(34)–C(35)–C(30) | 120.62(19) |
| C(41)–C(36)–C(37) | 118.36(19) | C(41)–C(36)–P(2)  | 122.29(16) |
| C(37)–C(36)–P(2)  | 119.31(15) | C(38)–C(37)–C(36) | 120.5(2)   |

|                     |          |                    |          |
|---------------------|----------|--------------------|----------|
| C(39)–C(38)–C(37)   | 120.3(2) | C(40)–C(39)–C(38)  | 119.6(2) |
| C(39)–C(40)–C(41)   | 120.2(2) | C(36)–C(41)–C(40)  | 120.9(2) |
| C(50A)–Cl(1)–C(50)  | 69.3(5)  | Cl(1A)–C(50)–Cl(1) | 110.7(5) |
| Cl(1A)–C(50)–C(50A) | 55.4(3)  | Cl(1)–C(50)–C(50A) | 55.3(4)  |

Symmetry operations for equivalent atoms

A  $-x+2, -y+1, -z$

Anisotropic displacement parameters ( $\text{\AA}^2$ ) for str0562. The anisotropic displacement factor exponent takes the form:  $-2\pi^2[h^2a^{*2}U^{11} + \dots + 2hka^*b^*U^{12}]$

|       | U <sup>11</sup> | U <sup>22</sup> | U <sup>33</sup> | U <sup>23</sup> | U <sup>13</sup> | U <sup>12</sup> |
|-------|-----------------|-----------------|-----------------|-----------------|-----------------|-----------------|
| Fe(1) | 0.01556(13)     | 0.01632(13)     | 0.01775(13)     | 0.00480(10)     | 0.00340(10)     | 0.00592(10)     |
| Fe(2) | 0.01581(13)     | 0.01663(13)     | 0.01639(13)     | 0.00498(10)     | 0.00302(9)      | 0.00589(10)     |
| Fe(3) | 0.02229(15)     | 0.02053(14)     | 0.01720(14)     | 0.00341(10)     | 0.00709(10)     | 0.00697(11)     |
| P(1)  | 0.0171(2)       | 0.0163(2)       | 0.0164(2)       | 0.00440(17)     | 0.00252(16)     | 0.00610(18)     |
| P(2)  | 0.0168(2)       | 0.0178(2)       | 0.0156(2)       | 0.00536(17)     | 0.00276(16)     | 0.00507(18)     |
| S(1)  | 0.0173(2)       | 0.0196(2)       | 0.0249(2)       | 0.00539(18)     | 0.00598(17)     | 0.00821(18)     |
| S(2)  | 0.0176(2)       | 0.0196(2)       | 0.0162(2)       | 0.00518(16)     | 0.00317(15)     | 0.00718(17)     |
| O(1)  | 0.0304(8)       | 0.0342(9)       | 0.0488(10)      | 0.0190(8)       | 0.0174(7)       | 0.0069(7)       |
| O(2)  | 0.0280(8)       | 0.0406(9)       | 0.0252(7)       | 0.0077(6)       | -0.0016(6)      | 0.0139(7)       |
| O(3)  | 0.0357(9)       | 0.0231(8)       | 0.0315(8)       | 0.0010(6)       | 0.0084(6)       | 0.0079(7)       |
| O(4)  | 0.0330(9)       | 0.0535(11)      | 0.0381(9)       | 0.0242(8)       | -0.0010(7)      | 0.0157(8)       |
| C(1)  | 0.0248(10)      | 0.0241(10)      | 0.0265(10)      | 0.0072(8)       | 0.0062(8)       | 0.0110(8)       |
| C(2)  | 0.0206(9)       | 0.0221(9)       | 0.0261(10)      | 0.0062(8)       | 0.0068(7)       | 0.0093(8)       |
| C(3)  | 0.0190(9)       | 0.0229(10)      | 0.0234(9)       | 0.0086(8)       | 0.0060(7)       | 0.0077(7)       |
| C(4)  | 0.0215(9)       | 0.0258(10)      | 0.0258(10)      | 0.0095(8)       | 0.0055(7)       | 0.0078(8)       |
| C(5)  | 0.0295(11)      | 0.0258(11)      | 0.0263(10)      | 0.0051(8)       | 0.0139(8)       | 0.0115(9)       |
| C(6)  | 0.0301(11)      | 0.0296(11)      | 0.0207(10)      | 0.0061(8)       | 0.0105(8)       | 0.0103(9)       |
| C(7)  | 0.0290(11)      | 0.0301(11)      | 0.0160(9)       | 0.0045(8)       | 0.0034(7)       | 0.0099(9)       |
| C(8)  | 0.0297(10)      | 0.0230(9)       | 0.0166(9)       | 0.0066(7)       | 0.0019(7)       | 0.0076(8)       |
| C(9)  | 0.0262(10)      | 0.0196(9)       | 0.0171(8)       | 0.0062(7)       | 0.0055(7)       | 0.0072(8)       |
| C(10) | 0.0314(11)      | 0.0267(10)      | 0.0269(10)      | 0.0107(8)       | 0.0161(8)       | 0.0086(9)       |
| C(11) | 0.0478(14)      | 0.0311(11)      | 0.0232(10)      | 0.0080(9)       | 0.0184(9)       | 0.0149(10)      |
| C(12) | 0.0462(13)      | 0.0275(11)      | 0.0149(9)       | 0.0051(8)       | 0.0062(8)       | 0.0117(10)      |
| C(13) | 0.0194(9)       | 0.0315(11)      | 0.0291(10)      | 0.0060(8)       | 0.0055(8)       | 0.0105(8)       |
| C(14) | 0.0192(9)       | 0.0238(9)       | 0.0189(9)       | 0.0051(7)       | 0.0030(7)       | 0.0075(7)       |
| C(15) | 0.0199(9)       | 0.0198(9)       | 0.0183(8)       | 0.0053(7)       | 0.0043(7)       | 0.0087(7)       |
| C(16) | 0.0279(10)      | 0.0214(9)       | 0.0236(9)       | 0.0038(8)       | 0.0065(8)       | 0.0111(8)       |
| C(17) | 0.0280(11)      | 0.0318(11)      | 0.0297(10)      | 0.0077(9)       | 0.0116(8)       | 0.0160(9)       |
| C(18) | 0.0178(9)       | 0.0229(9)       | 0.0233(9)       | 0.0108(7)       | 0.0049(7)       | 0.0080(7)       |
| C(19) | 0.0330(11)      | 0.0306(11)      | 0.0289(10)      | 0.0123(9)       | 0.0100(8)       | 0.0178(9)       |
| C(20) | 0.0382(13)      | 0.0387(13)      | 0.0449(13)      | 0.0231(11)      | 0.0152(10)      | 0.0260(11)      |
| C(21) | 0.0278(11)      | 0.0438(13)      | 0.0388(12)      | 0.0278(11)      | 0.0088(9)       | 0.0170(10)      |
| C(22) | 0.0311(11)      | 0.0394(12)      | 0.0251(10)      | 0.0157(9)       | 0.0055(8)       | 0.0119(10)      |
| C(23) | 0.0270(10)      | 0.0249(10)      | 0.0231(9)       | 0.0092(8)       | 0.0054(8)       | 0.0100(8)       |
| C(24) | 0.0206(9)       | 0.0187(9)       | 0.0240(9)       | 0.0033(7)       | 0.0001(7)       | 0.0077(7)       |
| C(25) | 0.0280(10)      | 0.0246(10)      | 0.0248(10)      | 0.0054(8)       | -0.0010(8)      | 0.0059(8)       |
| C(26) | 0.0420(13)      | 0.0352(13)      | 0.0254(11)      | 0.0039(9)       | -0.0071(9)      | 0.0069(10)      |
| C(27) | 0.0413(14)      | 0.0319(13)      | 0.0441(14)      | 0.0013(11)      | -0.0178(11)     | -0.0039(11)     |
| C(28) | 0.0296(12)      | 0.0294(12)      | 0.0511(15)      | 0.0110(11)      | -0.0069(10)     | -0.0044(10)     |
| C(29) | 0.0256(10)      | 0.0251(10)      | 0.0325(11)      | 0.0094(9)       | 0.0008(8)       | 0.0052(8)       |
| C(30) | 0.0172(9)       | 0.0188(9)       | 0.0211(9)       | 0.0039(7)       | 0.0026(7)       | 0.0051(7)       |
| C(31) | 0.0215(9)       | 0.0194(9)       | 0.0196(9)       | 0.0029(7)       | 0.0024(7)       | 0.0079(7)       |

|       |            |            |            |            |            |            |
|-------|------------|------------|------------|------------|------------|------------|
| C(32) | 0.0269(10) | 0.0301(11) | 0.0240(10) | 0.0024(8)  | -0.0023(8) | 0.0133(9)  |
| C(33) | 0.0181(9)  | 0.0311(11) | 0.0339(11) | -0.0008(9) | -0.0023(8) | 0.0086(8)  |
| C(34) | 0.0208(10) | 0.0296(11) | 0.0367(11) | 0.0052(9)  | 0.0086(8)  | 0.0050(8)  |
| C(35) | 0.0225(10) | 0.0299(11) | 0.0264(10) | 0.0096(8)  | 0.0047(8)  | 0.0057(8)  |
| C(36) | 0.0181(9)  | 0.0227(9)  | 0.0249(9)  | 0.0109(8)  | 0.0074(7)  | 0.0070(7)  |
| C(37) | 0.0421(13) | 0.0264(11) | 0.0281(10) | 0.0096(9)  | 0.0156(9)  | 0.0145(10) |
| C(38) | 0.0563(16) | 0.0271(12) | 0.0475(14) | 0.0143(10) | 0.0265(12) | 0.0207(11) |
| C(39) | 0.0488(15) | 0.0389(13) | 0.0542(15) | 0.0290(12) | 0.0216(12) | 0.0267(12) |
| C(40) | 0.0348(12) | 0.0464(14) | 0.0376(12) | 0.0258(11) | 0.0056(10) | 0.0178(11) |
| C(41) | 0.0257(10) | 0.0300(11) | 0.0289(10) | 0.0131(9)  | 0.0025(8)  | 0.0075(9)  |
| Cl(1) | 0.0668(6)  | 0.1258(9)  | 0.1232(9)  | 0.0898(8)  | 0.0510(6)  | 0.0513(6)  |
| C(50) | 0.040(3)   | 0.127(7)   | 0.098(5)   | 0.090(5)   | 0.031(3)   | 0.034(4)   |

Hydrogen coordinates and isotropic displacement parameters ( $\text{\AA}^2$ )  
for str0562.

|        | x         | y        | z          | U        |
|--------|-----------|----------|------------|----------|
| H(8A)  | 0.2368    | 0.1615   | 0.1220     | 0.028    |
| H(10A) | 0.7046    | 0.3103   | 0.1395     | 0.033    |
| H(11A) | 0.6056    | 0.1434   | 0.0140     | 0.040    |
| H(12A) | 0.3192    | 0.0522   | 0.0031     | 0.036    |
| H(13A) | 0.7516    | 0.1519   | 0.2550     | 0.032    |
| H(14A) | 0.5307    | 0.1648   | 0.3272     | 0.025    |
| H(16A) | 0.3624    | -0.1138  | 0.1295     | 0.029    |
| H(17A) | 0.6481    | -0.0191  | 0.1330     | 0.034    |
| H(19A) | 0.2749    | -0.2136  | 0.2697     | 0.034    |
| H(20A) | 0.3487    | -0.2967  | 0.3693     | 0.042    |
| H(21A) | 0.3698    | -0.2218  | 0.5087     | 0.040    |
| H(22A) | 0.3052    | -0.0685  | 0.5496     | 0.037    |
| H(23A) | 0.2242    | 0.0125   | 0.4502     | 0.029    |
| H(25A) | 0.1625    | -0.0507  | 0.0945     | 0.033    |
| H(26A) | -0.0128   | -0.1827  | -0.0125    | 0.045    |
| H(27A) | -0.2030   | -0.3347  | 0.0172     | 0.056    |
| H(28A) | -0.2169   | -0.3557  | 0.1524     | 0.050    |
| H(29A) | -0.0372   | -0.2276  | 0.2597     | 0.035    |
| H(31A) | 0.6180    | 0.3615   | 0.4046     | 0.024    |
| H(32A) | 0.8668    | 0.4204   | 0.4641     | 0.032    |
| H(33A) | 1.0585    | 0.5148   | 0.3964     | 0.035    |
| H(34A) | 1.0033    | 0.5531   | 0.2686     | 0.036    |
| H(35A) | 0.7557    | 0.4922   | 0.2075     | 0.032    |
| H(37A) | 0.5525    | 0.6009   | 0.3113     | 0.037    |
| H(38A) | 0.5563    | 0.7551   | 0.2580     | 0.048    |
| H(39A) | 0.4850    | 0.7351   | 0.1176     | 0.049    |
| H(40A) | 0.4137    | 0.5608   | 0.0297     | 0.044    |
| H(41A) | 0.4123    | 0.4067   | 0.0822     | 0.034    |
| H(1)   | -0.049(3) | 0.261(2) | 0.4793(15) | 0.026(6) |
| H(2)   | 0.103(3)  | 0.363(2) | 0.4787(15) | 0.027(6) |
| H(3)   | 0.080(3)  | 0.150(2) | 0.4998(13) | 0.019(5) |
| H(4)   | 0.127(3)  | 0.249(2) | 0.5717(16) | 0.032(6) |
| H(5)   | 0.344(3)  | 0.223(2) | 0.5353(15) | 0.030(6) |
| H(6)   | 0.355(3)  | 0.340(2) | 0.5198(15) | 0.027(6) |

Torsion angles [ $^\circ$ ] for str0562.

|                       |            |                       |           |
|-----------------------|------------|-----------------------|-----------|
| C(2)–Fe(1)–Fe(2)–C(3) | 137.64(12) | C(1)–Fe(1)–Fe(2)–C(3) | 28.86(16) |
|-----------------------|------------|-----------------------|-----------|

|                        |             |                        |             |
|------------------------|-------------|------------------------|-------------|
| P(1)–Fe(1)–Fe(2)–C(3)  | –127.85(10) | S(1)–Fe(1)–Fe(2)–C(3)  | 49.79(10)   |
| S(2)–Fe(1)–Fe(2)–C(3)  | –60.95(10)  | C(2)–Fe(1)–Fe(2)–C(4)  | 12.04(9)    |
| C(1)–Fe(1)–Fe(2)–C(4)  | –96.74(14)  | P(1)–Fe(1)–Fe(2)–C(4)  | 106.55(7)   |
| S(1)–Fe(1)–Fe(2)–C(4)  | –75.82(7)   | S(2)–Fe(1)–Fe(2)–C(4)  | 173.45(7)   |
| C(2)–Fe(1)–Fe(2)–S(1)  | 87.86(7)    | C(1)–Fe(1)–Fe(2)–S(1)  | –20.92(12)  |
| P(1)–Fe(1)–Fe(2)–S(1)  | –177.64(2)  | S(2)–Fe(1)–Fe(2)–S(1)  | –110.73(3)  |
| C(2)–Fe(1)–Fe(2)–S(2)  | –161.41(6)  | C(1)–Fe(1)–Fe(2)–S(2)  | 89.81(13)   |
| P(1)–Fe(1)–Fe(2)–S(2)  | –66.90(3)   | S(1)–Fe(1)–Fe(2)–S(2)  | 110.73(3)   |
| C(2)–Fe(1)–Fe(2)–P(2)  | –80.39(7)   | C(1)–Fe(1)–Fe(2)–P(2)  | 170.83(12)  |
| P(1)–Fe(1)–Fe(2)–P(2)  | 14.12(3)    | S(1)–Fe(1)–Fe(2)–P(2)  | –168.24(2)  |
| S(2)–Fe(1)–Fe(2)–P(2)  | 81.02(3)    | C(2)–Fe(1)–P(1)–C(15)  | 91.93(10)   |
| C(1)–Fe(1)–P(1)–C(15)  | –169.61(10) | S(1)–Fe(1)–P(1)–C(15)  | –21.9(2)    |
| S(2)–Fe(1)–P(1)–C(15)  | –50.63(8)   | Fe(2)–Fe(1)–P(1)–C(15) | –2.02(8)    |
| C(2)–Fe(1)–P(1)–C(24)  | –31.15(9)   | C(1)–Fe(1)–P(1)–C(24)  | 67.31(10)   |
| S(1)–Fe(1)–P(1)–C(24)  | –145.0(2)   | S(2)–Fe(1)–P(1)–C(24)  | –173.71(7)  |
| Fe(2)–Fe(1)–P(1)–C(24) | –125.10(7)  | C(2)–Fe(1)–P(1)–C(18)  | –149.66(9)  |
| C(1)–Fe(1)–P(1)–C(18)  | –51.20(10)  | S(1)–Fe(1)–P(1)–C(18)  | 96.5(2)     |
| S(2)–Fe(1)–P(1)–C(18)  | 67.78(7)    | Fe(2)–Fe(1)–P(1)–C(18) | 116.39(7)   |
| C(3)–Fe(2)–P(2)–C(9)   | –174.77(10) | C(4)–Fe(2)–P(2)–C(9)   | –72.61(10)  |
| S(1)–Fe(2)–P(2)–C(9)   | –22.58(13)  | S(2)–Fe(2)–P(2)–C(9)   | 83.54(8)    |
| Fe(1)–Fe(2)–P(2)–C(9)  | 28.85(8)    | C(3)–Fe(2)–P(2)–C(30)  | 55.04(10)   |
| C(4)–Fe(2)–P(2)–C(30)  | 157.19(10)  | S(1)–Fe(2)–P(2)–C(30)  | –152.78(11) |
| S(2)–Fe(2)–P(2)–C(30)  | –46.66(8)   | Fe(1)–Fe(2)–P(2)–C(30) | –101.35(8)  |
| C(3)–Fe(2)–P(2)–C(36)  | –59.17(9)   | C(4)–Fe(2)–P(2)–C(36)  | 42.98(10)   |
| S(1)–Fe(2)–P(2)–C(36)  | 93.02(12)   | S(2)–Fe(2)–P(2)–C(36)  | –160.87(7)  |
| Fe(1)–Fe(2)–P(2)–C(36) | 144.45(7)   | C(2)–Fe(1)–S(1)–C(5)   | 161.36(10)  |
| C(1)–Fe(1)–S(1)–C(5)   | 62.97(10)   | P(1)–Fe(1)–S(1)–C(5)   | –84.6(2)    |
| S(2)–Fe(1)–S(1)–C(5)   | –55.76(8)   | Fe(2)–Fe(1)–S(1)–C(5)  | –105.81(8)  |
| C(2)–Fe(1)–S(1)–Fe(2)  | –92.83(7)   | C(1)–Fe(1)–S(1)–Fe(2)  | 168.77(7)   |
| P(1)–Fe(1)–S(1)–Fe(2)  | 21.2(2)     | S(2)–Fe(1)–S(1)–Fe(2)  | 50.045(19)  |
| C(3)–Fe(2)–S(1)–C(5)   | –42.98(10)  | C(4)–Fe(2)–S(1)–C(5)   | –145.00(10) |
| S(2)–Fe(2)–S(1)–C(5)   | 57.17(8)    | P(2)–Fe(2)–S(1)–C(5)   | 164.90(11)  |
| Fe(1)–Fe(2)–S(1)–C(5)  | 107.18(8)   | C(3)–Fe(2)–S(1)–Fe(1)  | –150.16(6)  |
| C(4)–Fe(2)–S(1)–Fe(1)  | 107.82(7)   | S(2)–Fe(2)–S(1)–Fe(1)  | –50.004(19) |
| P(2)–Fe(2)–S(1)–Fe(1)  | 57.72(10)   | C(2)–Fe(1)–S(2)–C(7)   | 136.73(13)  |
| C(1)–Fe(1)–S(2)–C(7)   | –36.33(11)  | P(1)–Fe(1)–S(2)–C(7)   | –127.49(8)  |
| S(1)–Fe(1)–S(2)–C(7)   | 55.24(8)    | Fe(2)–Fe(1)–S(2)–C(7)  | 105.25(8)   |
| C(2)–Fe(1)–S(2)–Fe(2)  | 31.47(11)   | C(1)–Fe(1)–S(2)–Fe(2)  | –141.58(8)  |
| P(1)–Fe(1)–S(2)–Fe(2)  | 127.26(2)   | S(1)–Fe(1)–S(2)–Fe(2)  | –50.010(19) |
| C(3)–Fe(2)–S(2)–C(7)   | 37.19(10)   | C(4)–Fe(2)–S(2)–C(7)   | –123.26(18) |
| S(1)–Fe(2)–S(2)–C(7)   | –57.86(8)   | P(2)–Fe(2)–S(2)–C(7)   | 133.93(8)   |
| Fe(1)–Fe(2)–S(2)–C(7)  | –107.61(8)  | C(3)–Fe(2)–S(2)–Fe(1)  | 144.80(6)   |
| C(4)–Fe(2)–S(2)–Fe(1)  | –15.65(16)  | S(1)–Fe(2)–S(2)–Fe(1)  | 49.748(18)  |
| P(2)–Fe(2)–S(2)–Fe(1)  | –118.46(2)  | C(2)–Fe(1)–C(1)–O(1)   | –38.2(18)   |
| P(1)–Fe(1)–C(1)–O(1)   | –131.2(18)  | S(1)–Fe(1)–C(1)–O(1)   | 51.8(18)    |
| S(2)–Fe(1)–C(1)–O(1)   | 137.5(18)   | Fe(2)–Fe(1)–C(1)–O(1)  | 68.8(19)    |
| C(1)–Fe(1)–C(2)–O(2)   | 41(5)       | P(1)–Fe(1)–C(2)–O(2)   | 132(5)      |
| S(1)–Fe(1)–C(2)–O(2)   | –53(5)      | S(2)–Fe(1)–C(2)–O(2)   | –133(5)     |
| Fe(2)–Fe(1)–C(2)–O(2)  | –108(5)     | C(4)–Fe(2)–C(3)–O(3)   | 95.3(18)    |
| S(1)–Fe(2)–C(3)–O(3)   | 8.4(18)     | S(2)–Fe(2)–C(3)–O(3)   | –76.6(18)   |
| P(2)–Fe(2)–C(3)–O(3)   | –177.3(18)  | Fe(1)–Fe(2)–C(3)–O(3)  | –30.1(18)   |
| C(3)–Fe(2)–C(4)–O(4)   | –85(5)      | S(1)–Fe(2)–C(4)–O(4)   | 11(5)       |

|                         |             |                         |             |
|-------------------------|-------------|-------------------------|-------------|
| S(2)–Fe(2)–C(4)–O(4)    | 76(5)       | P(2)–Fe(2)–C(4)–O(4)    | –179(100)   |
| Fe(1)–Fe(2)–C(4)–O(4)   | 63(5)       | Fe(1)–S(1)–C(5)–C(6)    | 9.66(19)    |
| Fe(2)–S(1)–C(5)–C(6)    | –67.84(17)  | S(1)–C(5)–C(6)–C(7)     | 61.7(2)     |
| C(5)–C(6)–C(7)–S(2)     | –62.0(2)    | Fe(1)–S(2)–C(7)–C(6)    | –8.14(19)   |
| Fe(2)–S(2)–C(7)–C(6)    | 69.00(17)   | C(10)–Fe(3)–C(8)–C(12)  | 80.89(13)   |
| C(15)–Fe(3)–C(8)–C(12)  | –122.75(13) | C(9)–Fe(3)–C(8)–C(12)   | 119.54(17)  |
| C(14)–Fe(3)–C(8)–C(12)  | –166.07(12) | C(11)–Fe(3)–C(8)–C(12)  | 36.91(13)   |
| C(16)–Fe(3)–C(8)–C(12)  | –79.42(14)  | C(17)–Fe(3)–C(8)–C(12)  | –41.5(3)    |
| C(13)–Fe(3)–C(8)–C(12)  | 156.0(2)    | C(10)–Fe(3)–C(8)–C(9)   | –38.65(11)  |
| C(15)–Fe(3)–C(8)–C(9)   | 117.72(11)  | C(14)–Fe(3)–C(8)–C(9)   | 74.39(13)   |
| C(11)–Fe(3)–C(8)–C(9)   | –82.63(13)  | C(16)–Fe(3)–C(8)–C(9)   | 161.04(11)  |
| C(12)–Fe(3)–C(8)–C(9)   | –119.54(17) | C(17)–Fe(3)–C(8)–C(9)   | –161.1(2)   |
| C(13)–Fe(3)–C(8)–C(9)   | 36.4(3)     | C(12)–C(8)–C(9)–C(10)   | 0.1(2)      |
| Fe(3)–C(8)–C(9)–C(10)   | 59.44(14)   | C(12)–C(8)–C(9)–P(2)    | 179.04(14)  |
| Fe(3)–C(8)–C(9)–P(2)    | –121.61(15) | C(12)–C(8)–C(9)–Fe(3)   | –59.35(14)  |
| C(30)–P(2)–C(9)–C(8)    | 160.07(16)  | C(36)–P(2)–C(9)–C(8)    | –97.96(17)  |
| Fe(2)–P(2)–C(9)–C(8)    | 20.85(19)   | C(30)–P(2)–C(9)–C(10)   | –21.2(2)    |
| C(36)–P(2)–C(9)–C(10)   | 80.76(19)   | Fe(2)–P(2)–C(9)–C(10)   | –160.43(16) |
| C(30)–P(2)–C(9)–Fe(3)   | 70.72(14)   | C(36)–P(2)–C(9)–Fe(3)   | 172.69(12)  |
| Fe(2)–P(2)–C(9)–Fe(3)   | –68.49(14)  | C(10)–Fe(3)–C(9)–C(8)   | 118.26(16)  |
| C(15)–Fe(3)–C(9)–C(8)   | –82.31(13)  | C(14)–Fe(3)–C(9)–C(8)   | –124.62(11) |
| C(11)–Fe(3)–C(9)–C(8)   | 80.58(13)   | C(16)–Fe(3)–C(9)–C(8)   | –51.7(3)    |
| C(12)–Fe(3)–C(9)–C(8)   | 37.41(12)   | C(17)–Fe(3)–C(9)–C(8)   | 162.74(19)  |
| C(13)–Fe(3)–C(9)–C(8)   | –166.09(11) | C(15)–Fe(3)–C(9)–C(10)  | 159.43(12)  |
| C(14)–Fe(3)–C(9)–C(10)  | 117.11(12)  | C(11)–Fe(3)–C(9)–C(10)  | –37.68(13)  |
| C(8)–Fe(3)–C(9)–C(10)   | –118.26(16) | C(16)–Fe(3)–C(9)–C(10)  | –170.0(2)   |
| C(12)–Fe(3)–C(9)–C(10)  | –80.85(13)  | C(17)–Fe(3)–C(9)–C(10)  | 44.5(3)     |
| C(13)–Fe(3)–C(9)–C(10)  | 75.65(14)   | C(10)–Fe(3)–C(9)–P(2)   | –123.81(19) |
| C(15)–Fe(3)–C(9)–P(2)   | 35.62(17)   | C(14)–Fe(3)–C(9)–P(2)   | –6.69(15)   |
| C(11)–Fe(3)–C(9)–P(2)   | –161.49(16) | C(8)–Fe(3)–C(9)–P(2)    | 117.93(18)  |
| C(16)–Fe(3)–C(9)–P(2)   | 66.2(3)     | C(12)–Fe(3)–C(9)–P(2)   | 155.34(16)  |
| C(17)–Fe(3)–C(9)–P(2)   | –79.3(2)    | C(13)–Fe(3)–C(9)–P(2)   | –48.16(16)  |
| C(8)–C(9)–C(10)–C(11)   | –0.1(2)     | P(2)–C(9)–C(10)–C(11)   | –179.00(16) |
| Fe(3)–C(9)–C(10)–C(11)  | 59.91(15)   | C(8)–C(9)–C(10)–Fe(3)   | –60.02(13)  |
| P(2)–C(9)–C(10)–Fe(3)   | 121.09(17)  | C(15)–Fe(3)–C(10)–C(11) | –170.7(2)   |
| C(9)–Fe(3)–C(10)–C(11)  | –119.13(19) | C(14)–Fe(3)–C(10)–C(11) | 159.92(13)  |
| C(8)–Fe(3)–C(10)–C(11)  | –80.80(15)  | C(16)–Fe(3)–C(10)–C(11) | 51.8(3)     |
| C(12)–Fe(3)–C(10)–C(11) | –37.03(14)  | C(17)–Fe(3)–C(10)–C(11) | 79.07(16)   |
| C(13)–Fe(3)–C(10)–C(11) | 119.33(14)  | C(15)–Fe(3)–C(10)–C(9)  | –51.5(3)    |
| C(14)–Fe(3)–C(10)–C(9)  | –80.94(14)  | C(11)–Fe(3)–C(10)–C(9)  | 119.13(19)  |
| C(8)–Fe(3)–C(10)–C(9)   | 38.33(11)   | C(16)–Fe(3)–C(10)–C(9)  | 170.9(2)    |
| C(12)–Fe(3)–C(10)–C(9)  | 82.10(13)   | C(17)–Fe(3)–C(10)–C(9)  | –161.80(12) |
| C(13)–Fe(3)–C(10)–C(9)  | –121.53(12) | C(9)–C(10)–C(11)–C(12)  | 0.1(2)      |
| Fe(3)–C(10)–C(11)–C(12) | 59.48(15)   | C(9)–C(10)–C(11)–Fe(3)  | –59.37(14)  |
| C(10)–Fe(3)–C(11)–C(12) | –119.79(19) | C(15)–Fe(3)–C(11)–C(12) | 49.4(3)     |
| C(9)–Fe(3)–C(11)–C(12)  | –81.56(14)  | C(14)–Fe(3)–C(11)–C(12) | –166.10(19) |
| C(8)–Fe(3)–C(11)–C(12)  | –37.32(13)  | C(16)–Fe(3)–C(11)–C(12) | 80.92(15)   |
| C(17)–Fe(3)–C(11)–C(12) | 121.73(13)  | C(13)–Fe(3)–C(11)–C(12) | 163.06(13)  |
| C(15)–Fe(3)–C(11)–C(10) | 169.2(2)    | C(9)–Fe(3)–C(11)–C(10)  | 38.23(13)   |
| C(14)–Fe(3)–C(11)–C(10) | –46.3(3)    | C(8)–Fe(3)–C(11)–C(10)  | 82.46(14)   |
| C(16)–Fe(3)–C(11)–C(10) | –159.30(13) | C(12)–Fe(3)–C(11)–C(10) | 119.79(19)  |
| C(17)–Fe(3)–C(11)–C(10) | –118.49(14) | C(13)–Fe(3)–C(11)–C(10) | –77.16(16)  |

|                         |             |                         |             |
|-------------------------|-------------|-------------------------|-------------|
| C(10)–C(11)–C(12)–C(8)  | –0.1(2)     | Fe(3)–C(11)–C(12)–C(8)  | 58.50(14)   |
| C(10)–C(11)–C(12)–Fe(3) | –58.55(15)  | C(9)–C(8)–C(12)–C(11)   | 0.0(2)      |
| Fe(3)–C(8)–C(12)–C(11)  | –58.62(15)  | C(9)–C(8)–C(12)–Fe(3)   | 58.60(14)   |
| C(10)–Fe(3)–C(12)–C(11) | 37.62(13)   | C(15)–Fe(3)–C(12)–C(11) | –162.09(12) |
| C(9)–Fe(3)–C(12)–C(11)  | 82.28(14)   | C(14)–Fe(3)–C(12)–C(11) | 160.9(3)    |
| C(8)–Fe(3)–C(12)–C(11)  | 120.09(18)  | C(16)–Fe(3)–C(12)–C(11) | –118.88(13) |
| C(17)–Fe(3)–C(12)–C(11) | –75.93(15)  | C(13)–Fe(3)–C(12)–C(11) | –39.3(3)    |
| C(10)–Fe(3)–C(12)–C(8)  | –82.47(13)  | C(15)–Fe(3)–C(12)–C(8)  | 77.81(14)   |
| C(9)–Fe(3)–C(12)–C(8)   | –37.81(12)  | C(14)–Fe(3)–C(12)–C(8)  | 40.8(3)     |
| C(11)–Fe(3)–C(12)–C(8)  | –120.09(18) | C(16)–Fe(3)–C(12)–C(8)  | 121.03(12)  |
| C(17)–Fe(3)–C(12)–C(8)  | 163.98(12)  | C(13)–Fe(3)–C(12)–C(8)  | –159.37(19) |
| C(10)–Fe(3)–C(13)–C(14) | 119.85(12)  | C(15)–Fe(3)–C(13)–C(14) | –37.75(12)  |
| C(9)–Fe(3)–C(13)–C(14)  | 78.32(14)   | C(11)–Fe(3)–C(13)–C(14) | 161.07(12)  |
| C(8)–Fe(3)–C(13)–C(14)  | 51.0(3)     | C(16)–Fe(3)–C(13)–C(14) | –82.16(13)  |
| C(12)–Fe(3)–C(13)–C(14) | –170.75(19) | C(17)–Fe(3)–C(13)–C(14) | –119.58(18) |
| C(10)–Fe(3)–C(13)–C(17) | –120.57(13) | C(15)–Fe(3)–C(13)–C(17) | 81.83(13)   |
| C(9)–Fe(3)–C(13)–C(17)  | –162.10(12) | C(14)–Fe(3)–C(13)–C(17) | 119.58(18)  |
| C(11)–Fe(3)–C(13)–C(17) | –79.35(15)  | C(8)–Fe(3)–C(13)–C(17)  | 170.6(2)    |
| C(16)–Fe(3)–C(13)–C(17) | 37.42(12)   | C(12)–Fe(3)–C(13)–C(17) | –51.2(3)    |
| C(17)–C(13)–C(14)–C(15) | –0.5(2)     | Fe(3)–C(13)–C(14)–C(15) | 58.65(14)   |
| C(17)–C(13)–C(14)–Fe(3) | –59.16(15)  | C(10)–Fe(3)–C(14)–C(13) | –76.45(14)  |
| C(15)–Fe(3)–C(14)–C(13) | 119.93(17)  | C(9)–Fe(3)–C(14)–C(13)  | –119.50(13) |
| C(11)–Fe(3)–C(14)–C(13) | –43.2(3)    | C(8)–Fe(3)–C(14)–C(13)  | –160.89(12) |
| C(16)–Fe(3)–C(14)–C(13) | 80.96(13)   | C(12)–Fe(3)–C(14)–C(13) | 167.7(3)    |
| C(17)–Fe(3)–C(14)–C(13) | 37.26(13)   | C(10)–Fe(3)–C(14)–C(15) | 163.62(11)  |
| C(9)–Fe(3)–C(14)–C(15)  | 120.57(11)  | C(11)–Fe(3)–C(14)–C(15) | –163.15(19) |
| C(8)–Fe(3)–C(14)–C(15)  | 79.18(13)   | C(16)–Fe(3)–C(14)–C(15) | –38.97(11)  |
| C(12)–Fe(3)–C(14)–C(15) | 47.8(3)     | C(17)–Fe(3)–C(14)–C(15) | –82.67(12)  |
| C(13)–Fe(3)–C(14)–C(15) | –119.93(17) | C(13)–C(14)–C(15)–C(16) | 1.1(2)      |
| Fe(3)–C(14)–C(15)–C(16) | 60.75(13)   | C(13)–C(14)–C(15)–P(1)  | 172.42(14)  |
| Fe(3)–C(14)–C(15)–P(1)  | –127.91(15) | C(13)–C(14)–C(15)–Fe(3) | –59.67(14)  |
| C(24)–P(1)–C(15)–C(14)  | 174.97(16)  | C(18)–P(1)–C(15)–C(14)  | –78.32(18)  |
| Fe(1)–P(1)–C(15)–C(14)  | 48.72(19)   | C(24)–P(1)–C(15)–C(16)  | –15.7(2)    |
| C(18)–P(1)–C(15)–C(16)  | 91.05(19)   | Fe(1)–P(1)–C(15)–C(16)  | –141.91(15) |
| C(24)–P(1)–C(15)–Fe(3)  | 82.08(14)   | C(18)–P(1)–C(15)–Fe(3)  | –171.22(13) |
| Fe(1)–P(1)–C(15)–Fe(3)  | –44.17(16)  | C(10)–Fe(3)–C(15)–C(14) | –40.0(3)    |
| C(9)–Fe(3)–C(15)–C(14)  | –77.96(13)  | C(11)–Fe(3)–C(15)–C(14) | 158.8(3)    |
| C(8)–Fe(3)–C(15)–C(14)  | –121.62(12) | C(16)–Fe(3)–C(15)–C(14) | 117.29(16)  |
| C(12)–Fe(3)–C(15)–C(14) | –164.05(12) | C(17)–Fe(3)–C(15)–C(14) | 80.17(12)   |
| C(13)–Fe(3)–C(15)–C(14) | 36.97(11)   | C(10)–Fe(3)–C(15)–C(16) | –157.3(2)   |
| C(9)–Fe(3)–C(15)–C(16)  | 164.75(12)  | C(14)–Fe(3)–C(15)–C(16) | –117.29(16) |
| C(11)–Fe(3)–C(15)–C(16) | 41.5(3)     | C(8)–Fe(3)–C(15)–C(16)  | 121.09(12)  |
| C(12)–Fe(3)–C(15)–C(16) | 78.66(14)   | C(17)–Fe(3)–C(15)–C(16) | –37.12(12)  |
| C(13)–Fe(3)–C(15)–C(16) | –80.32(12)  | C(10)–Fe(3)–C(15)–P(1)  | 78.2(3)     |
| C(9)–Fe(3)–C(15)–P(1)   | 40.26(17)   | C(14)–Fe(3)–C(15)–P(1)  | 118.22(19)  |
| C(11)–Fe(3)–C(15)–P(1)  | –83.0(3)    | C(8)–Fe(3)–C(15)–P(1)   | –3.39(16)   |
| C(16)–Fe(3)–C(15)–P(1)  | –124.49(19) | C(12)–Fe(3)–C(15)–P(1)  | –45.83(18)  |
| C(17)–Fe(3)–C(15)–P(1)  | –161.60(16) | C(13)–Fe(3)–C(15)–P(1)  | 155.19(16)  |
| C(14)–C(15)–C(16)–C(17) | –1.3(2)     | P(1)–C(15)–C(16)–C(17)  | –172.08(15) |
| Fe(3)–C(15)–C(16)–C(17) | 59.29(14)   | C(14)–C(15)–C(16)–Fe(3) | –60.54(13)  |
| P(1)–C(15)–C(16)–Fe(3)  | 128.63(16)  | C(10)–Fe(3)–C(16)–C(17) | 37.4(3)     |
| C(15)–Fe(3)–C(16)–C(17) | –119.80(17) | C(9)–Fe(3)–C(16)–C(17)  | –160.5(2)   |

|                         |             |                           |             |
|-------------------------|-------------|---------------------------|-------------|
| C(14)–Fe(3)–C(16)–C(17) | –80.77(13)  | C(11)–Fe(3)–C(16)–C(17)   | 75.31(15)   |
| C(8)–Fe(3)–C(16)–C(17)  | 160.63(12)  | C(12)–Fe(3)–C(16)–C(17)   | 117.84(13)  |
| C(13)–Fe(3)–C(16)–C(17) | –37.18(12)  | C(10)–Fe(3)–C(16)–C(15)   | 157.2(2)    |
| C(9)–Fe(3)–C(16)–C(15)  | –40.7(3)    | C(14)–Fe(3)–C(16)–C(15)   | 39.03(11)   |
| C(11)–Fe(3)–C(16)–C(15) | –164.89(12) | C(8)–Fe(3)–C(16)–C(15)    | –79.58(13)  |
| C(12)–Fe(3)–C(16)–C(15) | –122.37(12) | C(17)–Fe(3)–C(16)–C(15)   | 119.80(17)  |
| C(13)–Fe(3)–C(16)–C(15) | 82.61(12)   | C(14)–C(13)–C(17)–C(16)   | –0.3(2)     |
| Fe(3)–C(13)–C(17)–C(16) | –58.93(15)  | C(14)–C(13)–C(17)–Fe(3)   | 58.65(14)   |
| C(15)–C(16)–C(17)–C(13) | 1.0(2)      | Fe(3)–C(16)–C(17)–C(13)   | 59.32(15)   |
| C(15)–C(16)–C(17)–Fe(3) | –58.36(14)  | C(10)–Fe(3)–C(17)–C(13)   | 75.72(14)   |
| C(15)–Fe(3)–C(17)–C(13) | –81.91(13)  | C(9)–Fe(3)–C(17)–C(13)    | 43.1(3)     |
| C(14)–Fe(3)–C(17)–C(13) | –37.42(12)  | C(11)–Fe(3)–C(17)–C(13)   | 117.69(13)  |
| C(8)–Fe(3)–C(17)–C(13)  | –170.8(2)   | C(16)–Fe(3)–C(17)–C(13)   | –119.68(17) |
| C(12)–Fe(3)–C(17)–C(13) | 158.38(12)  | C(10)–Fe(3)–C(17)–C(16)   | –164.60(12) |
| C(15)–Fe(3)–C(17)–C(16) | 37.77(11)   | C(9)–Fe(3)–C(17)–C(16)    | 162.74(18)  |
| C(14)–Fe(3)–C(17)–C(16) | 82.26(12)   | C(11)–Fe(3)–C(17)–C(16)   | –122.63(13) |
| C(8)–Fe(3)–C(17)–C(16)  | –51.1(3)    | C(12)–Fe(3)–C(17)–C(16)   | –81.94(14)  |
| C(13)–Fe(3)–C(17)–C(16) | 119.68(17)  | C(15)–P(1)–C(18)–C(23)    | 114.53(17)  |
| C(24)–P(1)–C(18)–C(23)  | –139.42(16) | Fe(1)–P(1)–C(18)–C(23)    | –17.48(18)  |
| C(15)–P(1)–C(18)–C(19)  | –58.13(17)  | C(24)–P(1)–C(18)–C(19)    | 47.92(18)   |
| Fe(1)–P(1)–C(18)–C(19)  | 169.86(14)  | C(23)–C(18)–C(19)–C(20)   | –0.9(3)     |
| P(1)–C(18)–C(19)–C(20)  | 171.92(18)  | C(18)–C(19)–C(20)–C(21)   | –0.9(4)     |
| C(19)–C(20)–C(21)–C(22) | 1.8(4)      | C(20)–C(21)–C(22)–C(23)   | –0.8(3)     |
| C(19)–C(18)–C(23)–C(22) | 1.9(3)      | P(1)–C(18)–C(23)–C(22)    | –170.75(16) |
| C(21)–C(22)–C(23)–C(18) | –1.1(3)     | C(15)–P(1)–C(24)–C(29)    | 140.41(17)  |
| C(18)–P(1)–C(24)–C(29)  | 39.32(19)   | Fe(1)–P(1)–C(24)–C(29)    | –85.88(17)  |
| C(15)–P(1)–C(24)–C(25)  | –47.81(19)  | C(18)–P(1)–C(24)–C(25)    | –148.89(17) |
| Fe(1)–P(1)–C(24)–C(25)  | 85.90(17)   | C(29)–C(24)–C(25)–C(26)   | –1.8(3)     |
| P(1)–C(24)–C(25)–C(26)  | –173.79(18) | C(24)–C(25)–C(26)–C(27)   | 1.6(4)      |
| C(25)–C(26)–C(27)–C(28) | –0.2(4)     | C(26)–C(27)–C(28)–C(29)   | –1.0(4)     |
| C(27)–C(28)–C(29)–C(24) | 0.8(4)      | C(25)–C(24)–C(29)–C(28)   | 0.6(3)      |
| P(1)–C(24)–C(29)–C(28)  | 172.50(19)  | C(9)–P(2)–C(30)–C(31)     | –114.53(17) |
| C(36)–P(2)–C(30)–C(31)  | 141.05(17)  | Fe(2)–P(2)–C(30)–C(31)    | 22.37(19)   |
| C(9)–P(2)–C(30)–C(35)   | 63.66(18)   | C(36)–P(2)–C(30)–C(35)    | –40.76(18)  |
| Fe(2)–P(2)–C(30)–C(35)  | –159.44(14) | C(35)–C(30)–C(31)–C(32)   | –1.9(3)     |
| P(2)–C(30)–C(31)–C(32)  | 176.28(15)  | C(30)–C(31)–C(32)–C(33)   | 1.0(3)      |
| C(31)–C(32)–C(33)–C(34) | 0.5(3)      | C(32)–C(33)–C(34)–C(35)   | –1.0(3)     |
| C(33)–C(34)–C(35)–C(30) | 0.1(3)      | C(31)–C(30)–C(35)–C(34)   | 1.4(3)      |
| P(2)–C(30)–C(35)–C(34)  | –176.89(17) | C(9)–P(2)–C(36)–C(41)     | 21.04(19)   |
| C(30)–P(2)–C(36)–C(41)  | 125.41(17)  | Fe(2)–P(2)–C(36)–C(41)    | –105.16(16) |
| C(9)–P(2)–C(36)–C(37)   | –161.40(17) | C(30)–P(2)–C(36)–C(37)    | –57.04(18)  |
| Fe(2)–P(2)–C(36)–C(37)  | 72.40(17)   | C(41)–C(36)–C(37)–C(38)   | 0.7(3)      |
| P(2)–C(36)–C(37)–C(38)  | –176.91(18) | C(36)–C(37)–C(38)–C(39)   | 0.2(4)      |
| C(37)–C(38)–C(39)–C(40) | –0.7(4)     | C(38)–C(39)–C(40)–C(41)   | 0.2(4)      |
| C(37)–C(36)–C(41)–C(40) | –1.2(3)     | P(2)–C(36)–C(41)–C(40)    | 176.42(17)  |
| C(39)–C(40)–C(41)–C(36) | 0.7(4)      | C(50A)–Cl(1)–C(50)–Cl(1A) | 0.0         |

Symmetry operations for equivalent atoms

A  $-x+2, -y+1, -z$



### Crystal data and structure refinement for 3

|                                             |                                                                                              |
|---------------------------------------------|----------------------------------------------------------------------------------------------|
| Identification code                         | 2021NCS0348r1                                                                                |
| Empirical formula                           | C <sub>40</sub> H <sub>32</sub> Fe <sub>3</sub> O <sub>4</sub> P <sub>2</sub> S <sub>2</sub> |
| Formula weight                              | 870.26                                                                                       |
| Temperature/K                               | 100.00(11)                                                                                   |
| Crystal system                              | monoclinic                                                                                   |
| Space group                                 | P2 <sub>1</sub> /n                                                                           |
| a/Å                                         | 15.4691(8)                                                                                   |
| b/Å                                         | 11.0407(4)                                                                                   |
| c/Å                                         | 22.8109(10)                                                                                  |
| α/°                                         | 90                                                                                           |
| β/°                                         | 106.043(4)                                                                                   |
| γ/°                                         | 90                                                                                           |
| Volume/Å <sup>3</sup>                       | 3744.1(3)                                                                                    |
| Z                                           | 4                                                                                            |
| ρ <sub>calc</sub> /g/cm <sup>3</sup>        | 1.544                                                                                        |
| μ/mm <sup>-1</sup>                          | 11.381                                                                                       |
| F(000)                                      | 1776.0                                                                                       |
| Crystal size/mm <sup>3</sup>                | 0.152 × 0.081 × 0.023                                                                        |
| Radiation                                   | Cu Kα (λ = 1.54184)                                                                          |
| 2θ range for data collection/°              | 6.192 to 140.546                                                                             |
| Index ranges                                | -18 ≤ h ≤ 17, -13 ≤ k ≤ 13, -22 ≤ l ≤ 27                                                     |
| Reflections collected                       | 21109                                                                                        |
| Independent reflections                     | 6780 [R <sub>int</sub> = 0.0755, R <sub>sigma</sub> = 0.0756]                                |
| Data/restraints/parameters                  | 6780/0/460                                                                                   |
| Goodness-of-fit on F <sup>2</sup>           | 1.029                                                                                        |
| Final R indexes [I ≥ 2σ (I)]                | R <sub>1</sub> = 0.0722, wR <sub>2</sub> = 0.1740                                            |
| Final R indexes [all data]                  | R <sub>1</sub> = 0.0941, wR <sub>2</sub> = 0.1864                                            |
| Largest diff. peak/hole / e Å <sup>-3</sup> | 1.35/-0.73                                                                                   |

**Fractional Atomic Coordinates (×10<sup>4</sup>) and Equivalent Isotropic Displacement Parameters (Å<sup>2</sup>×10<sup>3</sup>) for 2021NCS0348r1. U<sub>eq</sub> is defined as 1/3 of the trace of the orthogonalised U<sub>ij</sub> tensor.**

| Atom | x           | y           | z          | U(eq)     |
|------|-------------|-------------|------------|-----------|
| Fe1  | 2265.5 (6)  | 1320.6 (8)  | 6362.9 (4) | 20.5 (2)  |
| Fe2  | 3969.5 (6)  | 1879.3 (8)  | 6830.0 (4) | 22.3 (2)  |
| Fe3  | 2854.9 (7)  | 4983.9 (8)  | 5574.8 (4) | 27.7 (3)  |
| S1   | 3231.8 (11) | 362.3 (13)  | 7134.3 (7) | 28.5 (4)  |
| S2   | 3388.6 (11) | 946.8 (13)  | 5938.0 (6) | 25.3 (3)  |
| P1   | 1433.7 (10) | 2690.5 (13) | 5712.9 (6) | 20.7 (3)  |
| P2   | 4643.5 (11) | 3219.1 (14) | 6350.0 (7) | 25.8 (4)  |
| O1   | 1078 (4)    | -697 (4)    | 5828 (2)   | 42.3 (13) |
| O2   | 1396 (3)    | 2054 (5)    | 7291 (2)   | 41.0 (12) |

|     |           |          |             |           |
|-----|-----------|----------|-------------|-----------|
| O3  | 3525 (3)  | 3364 (4) | 7767.5 (19) | 33.9 (11) |
| O4  | 5669 (3)  | 820 (5)  | 7538 (2)    | 46.1 (13) |
| C1  | 1546 (5)  | 100 (6)  | 6041 (3)    | 30.0 (15) |
| C2  | 1744 (4)  | 1811 (6) | 6927 (3)    | 27.4 (14) |
| C3  | 3715 (4)  | 2834 (6) | 7393 (3)    | 25.3 (13) |
| C4  | 5030 (5)  | 1280 (6) | 7247 (3)    | 34.0 (16) |
| C5  | 3543 (6)  | -964 (6) | 6765 (3)    | 41.6 (18) |
| C6  | 3667 (5)  | -644 (6) | 6142 (3)    | 36.9 (16) |
| C7  | 313 (4)   | 2816 (5) | 5842 (3)    | 23.3 (12) |
| C8  | 124 (5)   | 3743 (5) | 6203 (3)    | 29.0 (14) |
| C9  | -717 (5)  | 3802 (6) | 6315 (3)    | 35.6 (16) |
| C10 | -1366 (5) | 2945 (7) | 6063 (3)    | 37.1 (16) |
| C11 | -1178 (5) | 2020 (6) | 5710 (3)    | 34.5 (16) |
| C12 | -344 (4)  | 1946 (6) | 5604 (3)    | 29.6 (14) |
| C13 | 1117 (4)  | 2397 (5) | 4887 (3)    | 22.4 (12) |
| C14 | 453 (4)   | 3071 (5) | 4491 (3)    | 25.4 (13) |
| C15 | 237 (4)   | 2872 (6) | 3865 (3)    | 29.2 (14) |
| C16 | 672 (5)   | 1993 (6) | 3633 (3)    | 32.8 (15) |
| C17 | 1316 (5)  | 1285 (6) | 4021 (3)    | 31.5 (15) |
| C18 | 1548 (4)  | 1496 (5) | 4646 (3)    | 27.4 (14) |
| C19 | 1788 (4)  | 4260 (5) | 5792 (2)    | 21.6 (12) |
| C20 | 1513 (5)  | 5264 (5) | 5380 (3)    | 29.5 (14) |
| C21 | 1969 (5)  | 6318 (6) | 5663 (3)    | 36.7 (17) |
| C22 | 2535 (5)  | 5990 (6) | 6251 (3)    | 33.4 (16) |
| C23 | 2420 (4)  | 4733 (5) | 6335 (3)    | 26.9 (14) |
| C24 | 4037 (4)  | 4070 (6) | 5688 (3)    | 27.6 (13) |
| C25 | 3367 (5)  | 3617 (6) | 5172 (3)    | 31.2 (15) |
| C26 | 3055 (5)  | 4577 (7) | 4747 (3)    | 37.9 (17) |
| C27 | 3542 (6)  | 5646 (7) | 4997 (3)    | 46 (2)    |
| C28 | 4145 (5)  | 5341 (6) | 5569 (3)    | 39.2 (17) |
| C29 | 5446 (5)  | 2358 (6) | 6045 (3)    | 31.5 (14) |
| C30 | 6251 (5)  | 1946 (7) | 6430 (4)    | 43.3 (18) |
| C31 | 6787 (5)  | 1150 (8) | 6222 (4)    | 49 (2)    |
| C32 | 6513 (6)  | 724 (8)  | 5632 (4)    | 50 (2)    |
| C33 | 5742 (5)  | 1136 (7) | 5248 (4)    | 45.5 (19) |
| C34 | 5201 (5)  | 1941 (6) | 5445 (3)    | 35.5 (16) |
| C35 | 5337 (5)  | 4443 (6) | 6785 (3)    | 33.1 (15) |
| C36 | 6105 (6)  | 4838 (8) | 6645 (4)    | 57 (2)    |
| C37 | 6599 (7)  | 5858 (9) | 6939 (5)    | 67 (3)    |
| C38 | 6289 (6)  | 6474 (8) | 7369 (4)    | 53 (2)    |
| C39 | 5530 (5)  | 6095 (7) | 7515 (3)    | 43.1 (18) |
| C40 | 5041 (5)  | 5085 (6) | 7217 (3)    | 32.8 (15) |

**Anisotropic Displacement Parameters ( $\text{\AA}^2 \times 10^3$ ) for 2021NCS0348r1. The Anisotropic displacement factor exponent takes the form:  $-2\pi^2[h^2a^{*2}U_{11}+2hka^*b^*U_{12}+\dots]$ .**

| Atom | $U_{11}$ | $U_{22}$ | $U_{33}$ | $U_{23}$ | $U_{13}$ | $U_{12}$ |
|------|----------|----------|----------|----------|----------|----------|
| Fe1  | 29.7 (5) | 14.1 (4) | 16.2 (4) | 0.8 (3)  | 3.8 (4)  | -2.1 (4) |
| Fe2  | 30.5 (5) | 19.3 (5) | 15.6 (4) | 0.4 (3)  | 3.7 (4)  | -0.3 (4) |
| Fe3  | 40.5 (6) | 15.0 (5) | 22.6 (5) | 2.8 (4)  | 0.2 (4)  | -7.0 (4) |
| S1   | 40.4 (9) | 20.3 (7) | 23.4 (7) | 6.0 (6)  | 6.6 (6)  | -0.5 (6) |
| S2   | 35.4 (8) | 20.1 (7) | 19.8 (7) | -1.9 (5) | 6.8 (6)  | -2.1 (6) |
| P1   | 31.7 (8) | 13.6 (7) | 15.3 (7) | -1.2 (5) | 3.9 (6)  | -2.3 (6) |
| P2   | 33.8 (9) | 21.0 (8) | 20.9 (7) | -4.1 (6) | 4.7 (6)  | -4.4 (6) |
| O1   | 62 (3)   | 22 (2)   | 34 (3)   | 1 (2)    | -1 (2)   | -15 (2)  |
| O2   | 47 (3)   | 54 (3)   | 24 (2)   | -2 (2)   | 13 (2)   | 7 (2)    |
| O3   | 42 (3)   | 35 (3)   | 22 (2)   | -7 (2)   | 4 (2)    | 3 (2)    |
| O4   | 42 (3)   | 52 (3)   | 42 (3)   | 15 (3)   | 6 (2)    | 19 (3)   |
| C1   | 45 (4)   | 19 (3)   | 19 (3)   | 6 (2)    | -3 (3)   | -3 (3)   |
| C2   | 26 (3)   | 25 (3)   | 28 (3)   | 7 (3)    | 3 (3)    | 3 (3)    |
| C3   | 28 (3)   | 24 (3)   | 21 (3)   | 4 (3)    | 0 (2)    | -2 (2)   |
| C4   | 49 (4)   | 19 (3)   | 38 (4)   | 5 (3)    | 19 (3)   | 2 (3)    |
| C5   | 61 (5)   | 18 (3)   | 42 (4)   | 6 (3)    | 8 (3)    | 10 (3)   |
| C6   | 56 (5)   | 15 (3)   | 43 (4)   | 0 (3)    | 19 (3)   | 9 (3)    |
| C7   | 27 (3)   | 20 (3)   | 24 (3)   | 3 (2)    | 8 (2)    | 1 (2)    |
| C8   | 46 (4)   | 18 (3)   | 20 (3)   | -1 (2)   | 6 (3)    | 2 (3)    |
| C9   | 54 (5)   | 25 (3)   | 30 (3)   | 3 (3)    | 15 (3)   | 12 (3)   |
| C10  | 38 (4)   | 38 (4)   | 38 (4)   | 16 (3)   | 15 (3)   | 7 (3)    |
| C11  | 39 (4)   | 25 (3)   | 35 (4)   | 3 (3)    | 3 (3)    | -1 (3)   |
| C12  | 41 (4)   | 22 (3)   | 23 (3)   | 3 (2)    | 4 (3)    | 0 (3)    |
| C13  | 31 (3)   | 14 (3)   | 20 (3)   | -1 (2)   | 4 (2)    | -4 (2)   |
| C14  | 35 (3)   | 16 (3)   | 25 (3)   | -6 (2)   | 6 (3)    | 0 (3)    |
| C15  | 33 (3)   | 22 (3)   | 26 (3)   | 1 (2)    | -3 (3)   | 2 (3)    |
| C16  | 48 (4)   | 30 (3)   | 15 (3)   | -4 (3)   | -1 (3)   | -4 (3)   |
| C17  | 48 (4)   | 20 (3)   | 21 (3)   | -5 (2)   | 2 (3)    | 7 (3)    |
| C18  | 38 (4)   | 20 (3)   | 18 (3)   | -1 (2)   | -1 (3)   | 5 (3)    |
| C19  | 27 (3)   | 18 (3)   | 20 (3)   | -4 (2)   | 7 (2)    | -7 (2)   |
| C20  | 39 (4)   | 17 (3)   | 27 (3)   | 0 (2)    | 1 (3)    | -1 (3)   |
| C21  | 55 (5)   | 12 (3)   | 35 (4)   | 2 (3)    | -1 (3)   | 2 (3)    |
| C22  | 47 (4)   | 16 (3)   | 29 (3)   | -9 (3)   | -4 (3)   | -7 (3)   |
| C23  | 43 (4)   | 18 (3)   | 18 (3)   | 2 (2)    | 5 (3)    | 5 (3)    |
| C24  | 27 (3)   | 28 (3)   | 29 (3)   | 4 (3)    | 11 (3)   | -6 (3)   |
| C25  | 47 (4)   | 25 (3)   | 22 (3)   | 1 (3)    | 11 (3)   | -8 (3)   |
| C26  | 54 (5)   | 38 (4)   | 21 (3)   | 10 (3)   | 9 (3)    | -3 (3)   |
| C27  | 68 (5)   | 30 (4)   | 38 (4)   | 19 (3)   | 12 (4)   | -13 (4)  |
| C28  | 50 (4)   | 28 (4)   | 38 (4)   | 5 (3)    | 10 (3)   | -17 (3)  |
| C29  | 41 (4)   | 25 (3)   | 33 (3)   | -6 (3)   | 17 (3)   | -3 (3)   |
| C30  | 42 (4)   | 45 (4)   | 45 (4)   | -6 (3)   | 15 (3)   | -4 (4)   |
| C31  | 40 (4)   | 54 (5)   | 54 (5)   | -7 (4)   | 16 (4)   | 3 (4)    |

**Anisotropic Displacement Parameters ( $\text{\AA}^2 \times 10^3$ ) for 2021NCS0348r1. The Anisotropic displacement factor exponent takes the form:  $-2\pi^2[h^2a^{*2}U_{11}+2hka^*b^*U_{12}+\dots]$ .**

| Atom | $U_{11}$ | $U_{22}$ | $U_{33}$ | $U_{23}$ | $U_{13}$ | $U_{12}$ |
|------|----------|----------|----------|----------|----------|----------|
| C32  | 46 (5)   | 44 (5)   | 65 (5)   | -12 (4)  | 21 (4)   | 0 (4)    |
| C33  | 53 (5)   | 42 (4)   | 48 (4)   | -18 (4)  | 25 (4)   | -15 (4)  |
| C34  | 40 (4)   | 35 (4)   | 37 (4)   | -6 (3)   | 19 (3)   | -11 (3)  |
| C35  | 36 (4)   | 31 (4)   | 30 (3)   | -7 (3)   | 4 (3)    | -7 (3)   |
| C36  | 71 (6)   | 50 (5)   | 53 (5)   | -22 (4)  | 24 (4)   | -24 (4)  |
| C37  | 73 (6)   | 60 (6)   | 75 (6)   | -23 (5)  | 34 (5)   | -37 (5)  |
| C38  | 63 (6)   | 39 (4)   | 49 (5)   | -16 (4)  | 3 (4)    | -18 (4)  |
| C39  | 56 (5)   | 32 (4)   | 37 (4)   | -15 (3)  | 7 (3)    | -5 (4)   |
| C40  | 39 (4)   | 26 (3)   | 31 (3)   | -4 (3)   | 6 (3)    | -3 (3)   |

**Bond Lengths for 2021NCS0348r1.**

| Atom | Atom | Length/ $\text{\AA}$ | Atom | Atom | Length/ $\text{\AA}$ |
|------|------|----------------------|------|------|----------------------|
| Fe1  | Fe2  | 2.6289 (13)          | C7   | C8   | 1.394 (9)            |
| Fe1  | S1   | 2.2353 (17)          | C7   | C12  | 1.394 (8)            |
| Fe1  | S2   | 2.2491 (19)          | C8   | C9   | 1.394 (10)           |
| Fe1  | P1   | 2.2556 (17)          | C9   | C10  | 1.384 (10)           |
| Fe1  | C1   | 1.772 (6)            | C10  | C11  | 1.381 (10)           |
| Fe1  | C2   | 1.780 (7)            | C11  | C12  | 1.379 (10)           |
| Fe2  | S1   | 2.2421 (18)          | C13  | C14  | 1.383 (8)            |
| Fe2  | S2   | 2.2354 (16)          | C13  | C18  | 1.393 (9)            |
| Fe2  | P2   | 2.2595 (19)          | C14  | C15  | 1.392 (8)            |
| Fe2  | C3   | 1.788 (7)            | C15  | C16  | 1.368 (9)            |
| Fe2  | C4   | 1.781 (7)            | C16  | C17  | 1.378 (9)            |
| Fe3  | C19  | 2.014 (6)            | C17  | C18  | 1.390 (8)            |
| Fe3  | C20  | 2.023 (7)            | C19  | C20  | 1.439 (8)            |
| Fe3  | C21  | 2.059 (7)            | C19  | C23  | 1.447 (8)            |
| Fe3  | C22  | 2.070 (7)            | C20  | C21  | 1.419 (9)            |
| Fe3  | C23  | 2.046 (6)            | C21  | C22  | 1.432 (9)            |
| Fe3  | C24  | 2.042 (7)            | C22  | C23  | 1.419 (9)            |
| Fe3  | C25  | 2.037 (7)            | C24  | C25  | 1.427 (9)            |
| Fe3  | C26  | 2.045 (7)            | C24  | C28  | 1.448 (9)            |
| Fe3  | C27  | 2.042 (7)            | C25  | C26  | 1.427 (9)            |
| Fe3  | C28  | 2.037 (8)            | C26  | C27  | 1.431 (10)           |
| S1   | C5   | 1.820 (7)            | C27  | C28  | 1.419 (10)           |
| S2   | C6   | 1.838 (6)            | C29  | C30  | 1.387 (10)           |
| P1   | C7   | 1.843 (6)            | C29  | C34  | 1.393 (9)            |
| P1   | C13  | 1.839 (6)            | C30  | C31  | 1.379 (11)           |
| P1   | C19  | 1.812 (6)            | C31  | C32  | 1.378 (11)           |
| P2   | C24  | 1.805 (6)            | C32  | C33  | 1.348 (12)           |
| P2   | C29  | 1.845 (7)            | C33  | C34  | 1.380 (10)           |

**Bond Lengths for 2021NCS0348r1.**

| Atom | Atom | Length/Å   | Atom | Atom | Length/Å   |
|------|------|------------|------|------|------------|
| P2   | C35  | 1.837 (7)  | C35  | C36  | 1.383 (11) |
| O1   | C1   | 1.158 (8)  | C35  | C40  | 1.390 (10) |
| O2   | C2   | 1.140 (8)  | C36  | C37  | 1.421 (11) |
| O3   | C3   | 1.138 (8)  | C37  | C38  | 1.383 (13) |
| O4   | C4   | 1.146 (8)  | C38  | C39  | 1.371 (12) |
| C5   | C6   | 1.526 (10) | C39  | C40  | 1.412 (9)  |

**Bond Angles for 2021NCS0348r1.**

| Atom | Atom | Atom | Angle/°    | Atom | Atom | Atom | Angle/°     |
|------|------|------|------------|------|------|------|-------------|
| S1   | Fe1  | Fe2  | 54.16 (5)  | C19  | P1   | Fe1  | 118.29 (19) |
| S1   | Fe1  | S2   | 79.88 (6)  | C19  | P1   | C7   | 100.6 (3)   |
| S1   | Fe1  | P1   | 166.12 (7) | C19  | P1   | C13  | 105.0 (3)   |
| S2   | Fe1  | Fe2  | 53.87 (5)  | C24  | P2   | Fe2  | 122.9 (2)   |
| S2   | Fe1  | P1   | 102.01 (6) | C24  | P2   | C29  | 101.6 (3)   |
| P1   | Fe1  | Fe2  | 115.79 (6) | C24  | P2   | C35  | 99.2 (3)    |
| C1   | Fe1  | Fe2  | 142.2 (2)  | C29  | P2   | Fe2  | 107.1 (2)   |
| C1   | Fe1  | S1   | 99.96 (19) | C35  | P2   | Fe2  | 119.9 (2)   |
| C1   | Fe1  | S2   | 98.8 (2)   | C35  | P2   | C29  | 103.2 (3)   |
| C1   | Fe1  | P1   | 93.4 (2)   | O1   | C1   | Fe1  | 179.6 (7)   |
| C1   | Fe1  | C2   | 99.9 (3)   | O2   | C2   | Fe1  | 175.8 (6)   |
| C2   | Fe1  | Fe2  | 103.8 (2)  | O3   | C3   | Fe2  | 174.6 (6)   |
| C2   | Fe1  | S1   | 85.01 (19) | O4   | C4   | Fe2  | 173.7 (6)   |
| C2   | Fe1  | S2   | 157.7 (2)  | C6   | C5   | S1   | 111.3 (4)   |
| C2   | Fe1  | P1   | 88.91 (19) | C5   | C6   | S2   | 112.1 (5)   |
| S1   | Fe2  | Fe1  | 53.92 (5)  | C8   | C7   | P1   | 120.7 (5)   |
| S1   | Fe2  | P2   | 168.99 (7) | C12  | C7   | P1   | 120.1 (5)   |
| S2   | Fe2  | Fe1  | 54.35 (5)  | C12  | C7   | C8   | 119.1 (6)   |
| S2   | Fe2  | S1   | 80.03 (6)  | C9   | C8   | C7   | 120.1 (6)   |
| S2   | Fe2  | P2   | 89.06 (6)  | C10  | C9   | C8   | 119.9 (6)   |
| P2   | Fe2  | Fe1  | 120.16 (6) | C11  | C10  | C9   | 120.1 (7)   |
| C3   | Fe2  | Fe1  | 92.00 (19) | C12  | C11  | C10  | 120.3 (6)   |
| C3   | Fe2  | S1   | 89.2 (2)   | C11  | C12  | C7   | 120.5 (6)   |
| C3   | Fe2  | S2   | 144.4 (2)  | C14  | C13  | P1   | 120.9 (5)   |
| C3   | Fe2  | P2   | 100.6 (2)  | C14  | C13  | C18  | 118.5 (5)   |
| C4   | Fe2  | Fe1  | 143.3 (2)  | C18  | C13  | P1   | 120.6 (4)   |
| C4   | Fe2  | S1   | 91.7 (2)   | C13  | C14  | C15  | 120.6 (6)   |
| C4   | Fe2  | S2   | 113.2 (2)  | C16  | C15  | C14  | 120.4 (6)   |
| C4   | Fe2  | P2   | 91.2 (2)   | C15  | C16  | C17  | 119.9 (6)   |
| C4   | Fe2  | C3   | 100.9 (3)  | C16  | C17  | C18  | 120.0 (6)   |
| C19  | Fe3  | C20  | 41.8 (2)   | C17  | C18  | C13  | 120.6 (6)   |
| C19  | Fe3  | C21  | 69.3 (3)   | P1   | C19  | Fe3  | 126.9 (3)   |

### Bond Angles for 2021NCS0348r1.

| Atom | Atom | Atom | Angle/°   | Atom | Atom | Atom | Angle/°   |
|------|------|------|-----------|------|------|------|-----------|
| C19  | Fe3  | C22  | 69.4 (2)  | C20  | C19  | Fe3  | 69.4 (4)  |
| C19  | Fe3  | C23  | 41.8 (2)  | C20  | C19  | P1   | 130.2 (4) |
| C19  | Fe3  | C24  | 122.6 (2) | C20  | C19  | C23  | 106.8 (5) |
| C19  | Fe3  | C25  | 105.3 (3) | C23  | C19  | Fe3  | 70.3 (3)  |
| C19  | Fe3  | C26  | 118.9 (3) | C23  | C19  | P1   | 123.0 (4) |
| C19  | Fe3  | C27  | 155.2 (3) | C19  | C20  | Fe3  | 68.8 (4)  |
| C19  | Fe3  | C28  | 161.5 (3) | C21  | C20  | Fe3  | 71.0 (4)  |
| C20  | Fe3  | C21  | 40.7 (2)  | C21  | C20  | C19  | 108.3 (5) |
| C20  | Fe3  | C22  | 68.8 (3)  | C20  | C21  | Fe3  | 68.3 (4)  |
| C20  | Fe3  | C23  | 69.4 (3)  | C20  | C21  | C22  | 108.5 (5) |
| C20  | Fe3  | C24  | 158.8 (3) | C22  | C21  | Fe3  | 70.1 (4)  |
| C20  | Fe3  | C25  | 121.2 (3) | C21  | C22  | Fe3  | 69.3 (4)  |
| C20  | Fe3  | C26  | 103.8 (3) | C23  | C22  | Fe3  | 68.9 (4)  |
| C20  | Fe3  | C27  | 119.3 (3) | C23  | C22  | C21  | 107.9 (5) |
| C20  | Fe3  | C28  | 156.4 (3) | C19  | C23  | Fe3  | 68.0 (3)  |
| C21  | Fe3  | C22  | 40.6 (3)  | C22  | C23  | Fe3  | 70.8 (4)  |
| C23  | Fe3  | C21  | 68.3 (3)  | C22  | C23  | C19  | 108.5 (5) |
| C23  | Fe3  | C22  | 40.3 (2)  | P2   | C24  | Fe3  | 127.1 (3) |
| C24  | Fe3  | C21  | 159.8 (3) | C25  | C24  | Fe3  | 69.4 (4)  |
| C24  | Fe3  | C22  | 124.1 (3) | C25  | C24  | P2   | 126.8 (5) |
| C24  | Fe3  | C23  | 108.6 (2) | C25  | C24  | C28  | 106.3 (6) |
| C24  | Fe3  | C26  | 69.5 (3)  | C28  | C24  | Fe3  | 69.0 (4)  |
| C24  | Fe3  | C27  | 69.6 (3)  | C28  | C24  | P2   | 127.0 (5) |
| C25  | Fe3  | C21  | 157.8 (3) | C24  | C25  | Fe3  | 69.7 (4)  |
| C25  | Fe3  | C22  | 159.5 (3) | C24  | C25  | C26  | 109.4 (6) |
| C25  | Fe3  | C23  | 122.8 (2) | C26  | C25  | Fe3  | 69.8 (4)  |
| C25  | Fe3  | C24  | 40.9 (3)  | C25  | C26  | Fe3  | 69.2 (4)  |
| C25  | Fe3  | C26  | 40.9 (3)  | C25  | C26  | C27  | 107.4 (6) |
| C25  | Fe3  | C27  | 68.8 (3)  | C27  | C26  | Fe3  | 69.4 (4)  |
| C26  | Fe3  | C21  | 121.4 (3) | C26  | C27  | Fe3  | 69.6 (4)  |
| C26  | Fe3  | C22  | 159.2 (3) | C28  | C27  | Fe3  | 69.4 (4)  |
| C26  | Fe3  | C23  | 157.2 (3) | C28  | C27  | C26  | 108.1 (6) |
| C27  | Fe3  | C21  | 106.6 (3) | C24  | C28  | Fe3  | 69.4 (4)  |
| C27  | Fe3  | C22  | 124.3 (3) | C27  | C28  | Fe3  | 69.9 (4)  |
| C27  | Fe3  | C23  | 161.3 (3) | C27  | C28  | C24  | 108.8 (6) |
| C27  | Fe3  | C26  | 41.0 (3)  | C30  | C29  | P2   | 120.6 (5) |
| C28  | Fe3  | C21  | 122.8 (3) | C30  | C29  | C34  | 117.8 (7) |
| C28  | Fe3  | C22  | 109.7 (3) | C34  | C29  | P2   | 120.8 (5) |
| C28  | Fe3  | C23  | 125.7 (3) | C31  | C30  | C29  | 120.7 (7) |
| C28  | Fe3  | C24  | 41.6 (3)  | C32  | C31  | C30  | 120.1 (8) |
| C28  | Fe3  | C25  | 68.7 (3)  | C33  | C32  | C31  | 119.8 (8) |
| C28  | Fe3  | C26  | 68.8 (3)  | C32  | C33  | C34  | 120.9 (7) |
| C28  | Fe3  | C27  | 40.7 (3)  | C33  | C34  | C29  | 120.5 (7) |

**Bond Angles for 2021NCS0348r1.**

| Atom | Atom | Atom | Angle/°     | Atom | Atom | Atom | Angle/°   |
|------|------|------|-------------|------|------|------|-----------|
| Fe1  | S1   | Fe2  | 71.91 (5)   | C36  | C35  | P2   | 121.2 (6) |
| C5   | S1   | Fe1  | 102.8 (2)   | C36  | C35  | C40  | 118.4 (6) |
| C5   | S1   | Fe2  | 103.6 (3)   | C40  | C35  | P2   | 120.0 (5) |
| Fe2  | S2   | Fe1  | 71.78 (5)   | C35  | C36  | C37  | 121.6 (8) |
| C6   | S2   | Fe1  | 102.8 (2)   | C38  | C37  | C36  | 118.5 (8) |
| C6   | S2   | Fe2  | 101.7 (2)   | C39  | C38  | C37  | 120.7 (7) |
| C7   | P1   | Fe1  | 109.65 (19) | C38  | C39  | C40  | 120.3 (7) |
| C13  | P1   | Fe1  | 119.8 (2)   | C35  | C40  | C39  | 120.4 (7) |
| C13  | P1   | C7   | 100.4 (3)   |      |      |      |           |

**Torsion Angles for 2021NCS0348r1.**

| A   | B   | C   | D   | Angle/°   | A   | B   | C   | D   | Angle/°    |
|-----|-----|-----|-----|-----------|-----|-----|-----|-----|------------|
| Fe1 | S1  | C5  | C6  | 40.2 (6)  | C13 | P1  | C19 | C20 | 28.9 (7)   |
| Fe1 | S2  | C6  | C5  | -33.6 (6) | C13 | P1  | C19 | C23 | -153.6 (5) |
| Fe1 | P1  | C7  | C8  | 97.6 (5)  | C13 | C14 | C15 | C16 | 0.9 (10)   |
| Fe1 | P1  | C7  | C12 | -79.2 (5) | C14 | C13 | C18 | C17 | 0.2 (9)    |
| Fe1 | P1  | C13 | C14 | 165.5 (4) | C14 | C15 | C16 | C17 | 1.2 (10)   |
| Fe1 | P1  | C13 | C18 | -15.1 (6) | C15 | C16 | C17 | C18 | -2.5 (10)  |
| Fe1 | P1  | C19 | Fe3 | 72.3 (4)  | C16 | C17 | C18 | C13 | 1.8 (10)   |
| Fe1 | P1  | C19 | C20 | 165.7 (5) | C18 | C13 | C14 | C15 | -1.5 (9)   |
| Fe1 | P1  | C19 | C23 | -16.9 (6) | C19 | P1  | C7  | C8  | -27.8 (5)  |
| Fe2 | S1  | C5  | C6  | -33.9 (6) | C19 | P1  | C7  | C12 | 155.4 (5)  |
| Fe2 | S2  | C6  | C5  | 40.1 (6)  | C19 | P1  | C13 | C14 | -58.5 (6)  |
| Fe2 | P2  | C24 | Fe3 | 46.6 (5)  | C19 | P1  | C13 | C18 | 120.8 (5)  |
| Fe2 | P2  | C24 | C25 | -44.2 (7) | C19 | C20 | C21 | Fe3 | 58.9 (5)   |
| Fe2 | P2  | C24 | C28 | 137.0 (6) | C19 | C20 | C21 | C22 | 0.2 (8)    |
| Fe2 | P2  | C29 | C30 | -74.6 (6) | C20 | C19 | C23 | Fe3 | -60.1 (4)  |
| Fe2 | P2  | C29 | C34 | 95.1 (6)  | C20 | C19 | C23 | C22 | -0.8 (7)   |
| Fe2 | P2  | C35 | C36 | 144.1 (6) | C20 | C21 | C22 | Fe3 | 57.6 (5)   |
| Fe2 | P2  | C35 | C40 | -43.4 (6) | C20 | C21 | C22 | C23 | -0.7 (9)   |
| Fe3 | C19 | C20 | C21 | -60.3 (5) | C21 | C22 | C23 | Fe3 | 58.5 (5)   |
| Fe3 | C19 | C23 | C22 | 59.3 (5)  | C21 | C22 | C23 | C19 | 0.9 (8)    |
| Fe3 | C20 | C21 | C22 | -58.7 (5) | C23 | C19 | C20 | Fe3 | 60.7 (4)   |
| Fe3 | C21 | C22 | C23 | -58.3 (5) | C23 | C19 | C20 | C21 | 0.4 (8)    |
| Fe3 | C22 | C23 | C19 | -57.6 (4) | C24 | P2  | C29 | C30 | 155.3 (6)  |
| Fe3 | C24 | C25 | C26 | 58.7 (5)  | C24 | P2  | C29 | C34 | -35.0 (6)  |
| Fe3 | C24 | C28 | C27 | -58.9 (6) | C24 | P2  | C35 | C36 | -79.1 (7)  |
| Fe3 | C25 | C26 | C27 | 59.1 (5)  | C24 | P2  | C35 | C40 | 93.3 (6)   |
| Fe3 | C26 | C27 | C28 | 59.0 (6)  | C24 | C25 | C26 | Fe3 | -58.6 (5)  |
| Fe3 | C27 | C28 | C24 | 58.6 (5)  | C24 | C25 | C26 | C27 | 0.5 (8)    |
| S1  | C5  | C6  | S2  | -3.9 (8)  | C25 | C24 | C28 | Fe3 | 59.7 (5)   |

**Torsion Angles for 2021NCS0348r1.**

| A   | B   | C   | D   | Angle/°    | A   | B   | C   | D   | Angle/°    |
|-----|-----|-----|-----|------------|-----|-----|-----|-----|------------|
| P1  | C7  | C8  | C9  | -177.7 (5) | C25 | C24 | C28 | C27 | 0.8 (8)    |
| P1  | C7  | C12 | C11 | 178.6 (5)  | C25 | C26 | C27 | Fe3 | -59.0 (5)  |
| P1  | C13 | C14 | C15 | 177.8 (5)  | C25 | C26 | C27 | C28 | 0.0 (9)    |
| P1  | C13 | C18 | C17 | -179.2 (5) | C26 | C27 | C28 | Fe3 | -59.1 (6)  |
| P1  | C19 | C20 | Fe3 | -121.6 (6) | C26 | C27 | C28 | C24 | -0.5 (9)   |
| P1  | C19 | C20 | C21 | 178.2 (5)  | C28 | C24 | C25 | Fe3 | -59.4 (5)  |
| P1  | C19 | C23 | Fe3 | 121.9 (5)  | C28 | C24 | C25 | C26 | -0.8 (8)   |
| P1  | C19 | C23 | C22 | -178.8 (5) | C29 | P2  | C24 | Fe3 | 165.9 (4)  |
| P2  | C24 | C25 | Fe3 | 121.6 (5)  | C29 | P2  | C24 | C25 | 75.2 (6)   |
| P2  | C24 | C25 | C26 | -179.8 (5) | C29 | P2  | C24 | C28 | -103.6 (7) |
| P2  | C24 | C28 | Fe3 | -121.4 (6) | C29 | P2  | C35 | C36 | 25.2 (7)   |
| P2  | C24 | C28 | C27 | 179.8 (6)  | C29 | P2  | C35 | C40 | -162.3 (5) |
| P2  | C29 | C30 | C31 | 170.0 (6)  | C29 | C30 | C31 | C32 | -2.1 (13)  |
| P2  | C29 | C34 | C33 | -169.4 (6) | C30 | C29 | C34 | C33 | 0.6 (10)   |
| P2  | C35 | C36 | C37 | 173.9 (8)  | C30 | C31 | C32 | C33 | 3.5 (13)   |
| P2  | C35 | C40 | C39 | -174.4 (5) | C31 | C32 | C33 | C34 | -2.9 (13)  |
| C7  | P1  | C13 | C14 | 45.6 (5)   | C32 | C33 | C34 | C29 | 0.9 (12)   |
| C7  | P1  | C13 | C18 | -135.1 (5) | C34 | C29 | C30 | C31 | 0.0 (11)   |
| C7  | P1  | C19 | Fe3 | -168.4 (4) | C35 | P2  | C24 | Fe3 | -88.4 (4)  |
| C7  | P1  | C19 | C20 | -75.0 (6)  | C35 | P2  | C24 | C25 | -179.1 (6) |
| C7  | P1  | C19 | C23 | 102.5 (5)  | C35 | P2  | C24 | C28 | 2.1 (7)    |
| C7  | C8  | C9  | C10 | -0.6 (9)   | C35 | P2  | C29 | C30 | 52.8 (7)   |
| C8  | C7  | C12 | C11 | 1.7 (9)    | C35 | P2  | C29 | C34 | -137.5 (6) |
| C8  | C9  | C10 | C11 | 1.2 (10)   | C35 | C36 | C37 | C38 | -1.0 (15)  |
| C9  | C10 | C11 | C12 | -0.4 (10)  | C36 | C35 | C40 | C39 | -1.8 (11)  |
| C10 | C11 | C12 | C7  | -1.1 (9)   | C36 | C37 | C38 | C39 | 1.0 (15)   |
| C12 | C7  | C8  | C9  | -0.9 (9)   | C37 | C38 | C39 | C40 | -1.5 (13)  |
| C13 | P1  | C7  | C8  | -135.4 (5) | C38 | C39 | C40 | C35 | 1.9 (11)   |
| C13 | P1  | C7  | C12 | 47.8 (5)   | C40 | C35 | C36 | C37 | 1.3 (13)   |
| C13 | P1  | C19 | Fe3 | -64.5 (4)  |     |     |     |     |            |

**Hydrogen Atom Coordinates ( $\text{\AA}\times 10^4$ ) and Isotropic Displacement Parameters ( $\text{\AA}^2\times 10^3$ ) for 2021NCS0348r1.**

| Atom | x        | y        | z       | U(eq) |
|------|----------|----------|---------|-------|
| H5A  | 4110.63  | -1306.09 | 7026.65 | 50    |
| H5B  | 3069.19  | -1588.02 | 6713.97 | 50    |
| H6A  | 3277.94  | -1174.81 | 5828.28 | 44    |
| H6B  | 4299.5   | -798.7   | 6146.52 | 44    |
| H8   | 568.02   | 4334.36  | 6373.37 | 35    |
| H9   | -843.7   | 4429.3   | 6564.24 | 43    |
| H10  | -1943.13 | 2994.32  | 6132.45 | 45    |



**Hydrogen Atom Coordinates ( $\text{\AA}\times 10^4$ ) and Isotropic Displacement Parameters ( $\text{\AA}^2\times 10^3$ )  
for 2021NCS0348r1.**

| <b>Atom</b> | <b>x</b> | <b>y</b> | <b>z</b> | <b>U(eq)</b> |
|-------------|----------|----------|----------|--------------|
| H11         | -1624.41 | 1430.95  | 5539.67  | 41           |
| H12         | -215.59  | 1298.66  | 5366.67  | 35           |
| H14         | 141.15   | 3676.33  | 4648.34  | 31           |
| H15         | -214.67  | 3348.49  | 3597.14  | 35           |
| H16         | 530.19   | 1869.9   | 3204.37  | 39           |
| H17         | 1601.52  | 653.64   | 3861.53  | 38           |
| H18         | 2005.27  | 1021.81  | 4910.88  | 33           |
| H20         | 1096.94  | 5228.22  | 4986.61  | 35           |
| H21         | 1908.36  | 7107.35  | 5490.43  | 44           |
| H22         | 2918.76  | 6520.28  | 6535.25  | 40           |
| H23         | 2709.44  | 4278.61  | 6688.76  | 32           |
| H25         | 3160.96  | 2802.78  | 5119.94  | 37           |
| H26         | 2606.21  | 4516.65  | 4368.18  | 45           |
| H27         | 3473.1   | 6424.13  | 4812.46  | 55           |
| H28         | 4551.63  | 5882.24  | 5831.36  | 47           |
| H30         | 6434.57  | 2215.23  | 6841.82  | 52           |
| H31         | 7345.71  | 895.31   | 6486.7   | 59           |
| H32         | 6866.24  | 141.65   | 5495.95  | 61           |
| H33         | 5570.32  | 868.16   | 4836.4   | 55           |
| H34         | 4655.8   | 2213.41  | 5169.99  | 43           |
| H36         | 6307.29  | 4416.53  | 6344.35  | 68           |
| H37         | 7130.86  | 6111.8   | 6842.72  | 80           |
| H38         | 6605.42  | 7165.84  | 7565.25  | 64           |
| H39         | 5332.74  | 6514.55  | 7817.71  | 52           |
| H40         | 4505.56  | 4843.78  | 7311.42  | 39           |

## Crystal data and structure refinement for 4a

|                                             |                                                                                              |
|---------------------------------------------|----------------------------------------------------------------------------------------------|
| Identification code                         | xstr0167                                                                                     |
| Empirical formula                           | C <sub>50</sub> H <sub>38</sub> Fe <sub>3</sub> O <sub>4</sub> P <sub>2</sub> S <sub>2</sub> |
| Formula weight                              | 996.41                                                                                       |
| Temperature/K                               | 150.0(1)                                                                                     |
| Crystal system                              | triclinic                                                                                    |
| Space group                                 | P-1                                                                                          |
| a/Å                                         | 11.7727(4)                                                                                   |
| b/Å                                         | 12.3881(3)                                                                                   |
| c/Å                                         | 18.5833(3)                                                                                   |
| α/°                                         | 76.2386(18)                                                                                  |
| β/°                                         | 79.887(2)                                                                                    |
| γ/°                                         | 82.837(3)                                                                                    |
| Volume/Å <sup>3</sup>                       | 2581.75(12)                                                                                  |
| Z                                           | 2                                                                                            |
| ρ <sub>calc</sub> /cm <sup>3</sup>          | 1.282                                                                                        |
| μ/mm <sup>-1</sup>                          | 1.013                                                                                        |
| F(000)                                      | 1020.0                                                                                       |
| Crystal size/mm <sup>3</sup>                | 0.2326 × 0.1938 × 0.1221                                                                     |
| Radiation                                   | MoKα (λ = 0.71073)                                                                           |
| 2θ range for data collection/°              | 5.57 to 51.994                                                                               |
| Index ranges                                | -14 ≤ h ≤ 12, -15 ≤ k ≤ 11, -22 ≤ l ≤ 17                                                     |
| Reflections collected                       | 16058                                                                                        |
| Independent reflections                     | 10055 [R <sub>int</sub> = 0.0238, R <sub>sigma</sub> = 0.0463]                               |
| Data/restraints/parameters                  | 10055/0/550                                                                                  |
| Goodness-of-fit on F <sup>2</sup>           | 1.053                                                                                        |
| Final R indexes [I ≥ 2σ (I)]                | R <sub>1</sub> = 0.0759, wR <sub>2</sub> = 0.2279                                            |
| Final R indexes [all data]                  | R <sub>1</sub> = 0.0883, wR <sub>2</sub> = 0.2472                                            |
| Largest diff. peak/hole / e Å <sup>-3</sup> | 4.31/-0.55                                                                                   |

### Fractional Atomic Coordinates (×10<sup>4</sup>) and Equivalent Isotropic Displacement Parameters (Å<sup>2</sup>×10<sup>3</sup>) for xstr0167. U<sub>eq</sub> is defined as 1/3 of of the trace of the orthogonalised U<sub>ij</sub> tensor.

| Atom | x           | y           | z          | U(eq)    |
|------|-------------|-------------|------------|----------|
| Fe1  | 6959.7 (6)  | 7036.2 (6)  | 8538.5 (4) | 15.3 (2) |
| Fe2  | 6626.8 (6)  | 9020.7 (6)  | 7671.0 (4) | 15.2 (2) |
| Fe3  | 9445.2 (7)  | 7046.3 (6)  | 6346.1 (4) | 19.3 (2) |
| S1   | 5836.2 (11) | 8490.6 (10) | 8892.6 (7) | 16.8 (3) |
| S2   | 5773.2 (11) | 7472.2 (10) | 7662.3 (7) | 16.3 (3) |
| P1   | 7870.2 (12) | 5636.9 (11) | 8024.3 (7) | 18.2 (3) |
| P2   | 7597.4 (12) | 9366.2 (11) | 6489.2 (7) | 17.4 (3) |
| O1   | 9025 (4)    | 7665 (4)    | 8954 (2)   | 30.8 (9) |

|      |           |           |           |           |
|------|-----------|-----------|-----------|-----------|
| O2   | 6343 (4)  | 5460 (4)  | 9960 (2)  | 36.8 (11) |
| O3   | 8438 (4)  | 10120 (4) | 8043 (2)  | 31.8 (10) |
| O4   | 4814 (4)  | 10835 (3) | 7360 (2)  | 30.5 (9)  |
| C0AA | 8227 (5)  | 7406 (5)  | 8770 (3)  | 21.3 (11) |
| C2   | 6552 (5)  | 6054 (5)  | 9385 (3)  | 22.7 (11) |
| C3   | 7733 (5)  | 9687 (5)  | 7897 (3)  | 21.3 (11) |
| C4   | 5538 (5)  | 10143 (4) | 7457 (3)  | 21.0 (11) |
| C5   | 6394 (5)  | 9091 (5)  | 9527 (3)  | 20.5 (11) |
| C6   | 6724 (6)  | 8409 (5)  | 10178 (3) | 31.2 (13) |
| C7   | 7026 (7)  | 8904 (7)  | 10717 (4) | 45.8 (18) |
| C8   | 6983 (7)  | 10034 (7) | 10605 (4) | 46.0 (18) |
| C9   | 6660 (6)  | 10703 (6) | 9964 (4)  | 36.1 (15) |
| C10  | 6357 (5)  | 10231 (5) | 9422 (3)  | 28.0 (12) |
| C11  | 4262 (5)  | 7665 (4)  | 8026 (3)  | 20.2 (11) |
| C12  | 3786 (5)  | 7048 (5)  | 8721 (3)  | 24.3 (12) |
| C13  | 2594 (5)  | 7174 (6)  | 8950 (3)  | 31.6 (13) |
| C14  | 1881 (5)  | 7915 (6)  | 8506 (4)  | 37.0 (15) |
| C15  | 2367 (5)  | 8530 (6)  | 7815 (4)  | 33.9 (14) |
| C16  | 3540 (5)  | 8393 (5)  | 7581 (3)  | 24.0 (11) |
| C17  | 8521 (5)  | 5815 (4)  | 7047 (3)  | 19.8 (10) |
| C18  | 9633 (5)  | 5358 (5)  | 6735 (3)  | 25.3 (12) |
| C19  | 9711 (6)  | 5622 (5)  | 5939 (3)  | 28.6 (13) |
| C20  | 8665 (5)  | 6222 (5)  | 5755 (3)  | 26.2 (12) |
| C21  | 7928 (5)  | 6346 (4)  | 6425 (3)  | 20.8 (11) |
| C22  | 9044 (5)  | 8695 (4)  | 6341 (3)  | 19.4 (10) |
| C23  | 9720 (5)  | 8178 (5)  | 6929 (3)  | 21.4 (11) |
| C24  | 10785 (5) | 7737 (5)  | 6605 (4)  | 27.6 (12) |
| C25  | 10815 (5) | 7953 (5)  | 5820 (3)  | 27.4 (12) |
| C26  | 9758 (5)  | 8541 (5)  | 5647 (3)  | 22.4 (11) |
| C27  | 6981 (5)  | 9249 (4)  | 5670 (3)  | 20.8 (11) |
| C28  | 6043 (5)  | 8639 (5)  | 5741 (3)  | 23.6 (11) |
| C29  | 5635 (6)  | 8524 (6)  | 5105 (3)  | 33.3 (14) |
| C30  | 6171 (6)  | 9016 (6)  | 4402 (4)  | 37.7 (15) |
| C31  | 7082 (6)  | 9638 (6)  | 4324 (3)  | 34.7 (15) |
| C32  | 7489 (6)  | 9772 (5)  | 4952 (3)  | 27.8 (12) |
| C33  | 7865 (5)  | 10849 (4) | 6217 (3)  | 23.5 (12) |
| C34  | 8905 (6)  | 11224 (5) | 6288 (3)  | 30.5 (13) |
| C35  | 9034 (7)  | 12370 (6) | 6113 (4)  | 44.0 (19) |
| C36  | 8133 (8)  | 13137 (6) | 5887 (4)  | 46 (2)    |
| C37  | 7117 (7)  | 12778 (5) | 5813 (4)  | 42.7 (18) |
| C38  | 6966 (6)  | 11650 (5) | 5976 (3)  | 30.9 (13) |
| C39  | 9061 (5)  | 4914 (5)  | 8512 (3)  | 27.1 (12) |
| C40  | 8955 (7)  | 3878 (6)  | 9023 (4)  | 44.4 (18) |
| C41  | 9831 (8)  | 3406 (8)  | 9419 (4)  | 58 (2)    |
| C42  | 10861 (7) | 3912 (8)  | 9313 (4)  | 58 (2)    |

|     |           |          |          |           |
|-----|-----------|----------|----------|-----------|
| C43 | 10994 (7) | 4919 (7) | 8799 (4) | 45.1 (18) |
| C44 | 10091 (6) | 5418 (6) | 8406 (4) | 33.4 (14) |
| C45 | 6945 (5)  | 4517 (4) | 8068 (3) | 22.8 (11) |
| C46 | 5794 (6)  | 4561 (5) | 8408 (4) | 30.9 (13) |
| C47 | 5107 (6)  | 3720 (5) | 8431 (4) | 37.0 (15) |
| C48 | 5552 (7)  | 2835 (5) | 8096 (4) | 38.6 (16) |
| C49 | 6677 (7)  | 2788 (5) | 7758 (4) | 41.4 (17) |
| C50 | 7391 (6)  | 3622 (5) | 7739 (4) | 34.1 (14) |

**Anisotropic Displacement Parameters ( $\text{\AA}^2 \times 10^3$ ) for xstr0167. The Anisotropic displacement factor exponent takes the form:  $-2\pi^2[h^2a^{*2}U_{11}+2hka^*b^*U_{12}+\dots]$ .**

| Atom | $U_{11}$ | $U_{22}$ | $U_{33}$ | $U_{23}$   | $U_{13}$  | $U_{12}$  |
|------|----------|----------|----------|------------|-----------|-----------|
| Fe1  | 16.5 (4) | 15.8 (4) | 13.1 (4) | -3.3 (3)   | -0.7 (3)  | -0.8 (3)  |
| Fe2  | 17.0 (4) | 15.5 (4) | 13.1 (4) | -3.6 (3)   | -0.7 (3)  | -2.4 (3)  |
| Fe3  | 21.0 (4) | 19.7 (4) | 16.6 (4) | -5.8 (3)   | 2.4 (3)   | -3.7 (3)  |
| S1   | 18.4 (6) | 18.1 (6) | 14.1 (6) | -5.3 (5)   | -0.2 (5)  | -1.7 (5)  |
| S2   | 17.6 (6) | 16.9 (6) | 14.5 (6) | -4.0 (4)   | -1.1 (5)  | -3.0 (5)  |
| P1   | 20.3 (7) | 16.5 (6) | 16.1 (6) | -3.1 (5)   | -0.7 (5)  | 1.6 (5)   |
| P2   | 21.9 (7) | 15.7 (6) | 14.3 (6) | -3.1 (5)   | 0.1 (5)   | -5.2 (5)  |
| O1   | 22 (2)   | 42 (3)   | 32 (2)   | -11.0 (19) | -7.6 (17) | -6.4 (18) |
| O2   | 52 (3)   | 29 (2)   | 23 (2)   | 2.7 (18)   | 3 (2)     | -9 (2)    |
| O3   | 31 (2)   | 42 (3)   | 29 (2)   | -14.5 (19) | -2.6 (18) | -17 (2)   |
| O4   | 29 (2)   | 27 (2)   | 36 (2)   | -9.3 (18)  | 10.7 (18) | 6.6 (18)  |
| C0AA | 21 (3)   | 25 (3)   | 16 (2)   | -6 (2)     | 1 (2)     | 2 (2)     |
| C2   | 27 (3)   | 22 (3)   | 19 (3)   | -5 (2)     | -3 (2)    | 0 (2)     |
| C3   | 22 (3)   | 26 (3)   | 13 (2)   | -2 (2)     | 1 (2)     | -3 (2)    |
| C4   | 24 (3)   | 19 (3)   | 20 (3)   | -5 (2)     | -1 (2)    | -3 (2)    |
| C5   | 18 (3)   | 26 (3)   | 19 (3)   | -13 (2)    | 3 (2)     | -1 (2)    |
| C6   | 41 (4)   | 32 (3)   | 24 (3)   | -13 (2)    | -8 (3)    | 1 (3)     |
| C7   | 51 (5)   | 61 (5)   | 36 (4)   | -23 (3)    | -23 (3)   | 1 (4)     |
| C8   | 45 (4)   | 64 (5)   | 44 (4)   | -38 (4)    | -8 (3)    | -8 (4)    |
| C9   | 37 (4)   | 38 (4)   | 39 (4)   | -24 (3)    | 5 (3)     | -6 (3)    |
| C10  | 31 (3)   | 26 (3)   | 28 (3)   | -12 (2)    | -2 (2)    | -3 (2)    |
| C11  | 21 (3)   | 23 (3)   | 18 (3)   | -7 (2)     | 1 (2)     | -7 (2)    |
| C12  | 23 (3)   | 26 (3)   | 23 (3)   | -4 (2)     | 0 (2)     | -6 (2)    |
| C13  | 25 (3)   | 42 (4)   | 26 (3)   | -7 (3)     | 6 (2)     | -11 (3)   |
| C14  | 18 (3)   | 56 (4)   | 39 (4)   | -16 (3)    | 1 (3)     | -10 (3)   |
| C15  | 18 (3)   | 49 (4)   | 38 (3)   | -11 (3)    | -12 (2)   | -1 (3)    |
| C16  | 24 (3)   | 30 (3)   | 20 (3)   | -6 (2)     | -5 (2)    | -3 (2)    |
| C17  | 24 (3)   | 16 (2)   | 18 (3)   | -5.0 (19)  | 0 (2)     | 0 (2)     |
| C18  | 27 (3)   | 20 (3)   | 26 (3)   | -7 (2)     | 3 (2)     | 2 (2)     |
| C19  | 35 (3)   | 25 (3)   | 26 (3)   | -12 (2)    | 7 (2)     | -6 (2)    |
| C20  | 37 (3)   | 26 (3)   | 18 (3)   | -7 (2)     | -1 (2)    | -12 (2)   |
| C21  | 25 (3)   | 21 (3)   | 16 (2)   | -3 (2)     | 0 (2)     | -5 (2)    |

|     |        |        |        |           |         |         |
|-----|--------|--------|--------|-----------|---------|---------|
| C22 | 23 (3) | 18 (2) | 18 (2) | -6.3 (19) | 2 (2)   | -7 (2)  |
| C23 | 22 (3) | 23 (3) | 19 (3) | -6 (2)    | -1 (2)  | -6 (2)  |
| C24 | 21 (3) | 28 (3) | 37 (3) | -14 (2)   | 0 (2)   | -6 (2)  |
| C25 | 25 (3) | 28 (3) | 28 (3) | -9 (2)    | 8 (2)   | -11 (2) |
| C26 | 27 (3) | 22 (3) | 17 (3) | -5 (2)    | 5 (2)   | -8 (2)  |
| C27 | 26 (3) | 16 (2) | 19 (3) | -3 (2)    | -3 (2)  | 1 (2)   |
| C28 | 27 (3) | 28 (3) | 16 (3) | -2 (2)    | -6 (2)  | -3 (2)  |
| C29 | 37 (4) | 39 (3) | 29 (3) | -8 (3)    | -17 (3) | -5 (3)  |
| C30 | 44 (4) | 47 (4) | 25 (3) | -11 (3)   | -13 (3) | 4 (3)   |
| C31 | 48 (4) | 38 (3) | 14 (3) | -2 (2)    | -4 (2)  | 4 (3)   |
| C32 | 34 (3) | 26 (3) | 22 (3) | -3 (2)    | -4 (2)  | -4 (2)  |
| C33 | 35 (3) | 17 (3) | 16 (3) | -4 (2)    | 6 (2)   | -9 (2)  |
| C34 | 39 (4) | 32 (3) | 22 (3) | -9 (2)    | 5 (2)   | -15 (3) |
| C35 | 64 (5) | 45 (4) | 29 (3) | -15 (3)   | 11 (3)  | -38 (4) |
| C36 | 80 (6) | 20 (3) | 35 (4) | -9 (3)    | 16 (4)  | -19 (3) |
| C37 | 64 (5) | 17 (3) | 37 (4) | -4 (3)    | 14 (3)  | -1 (3)  |
| C38 | 41 (4) | 21 (3) | 27 (3) | -4 (2)    | 4 (3)   | -3 (2)  |
| C39 | 27 (3) | 33 (3) | 17 (3) | -5 (2)    | -3 (2)  | 11 (2)  |
| C40 | 38 (4) | 48 (4) | 34 (4) | 10 (3)    | -1 (3)  | 4 (3)   |
| C41 | 51 (5) | 64 (5) | 38 (4) | 15 (4)    | -5 (4)  | 15 (4)  |
| C42 | 43 (5) | 82 (6) | 38 (4) | -1 (4)    | -13 (3) | 28 (4)  |
| C43 | 35 (4) | 59 (5) | 43 (4) | -15 (3)   | -15 (3) | 12 (3)  |
| C44 | 31 (3) | 37 (3) | 31 (3) | -7 (3)    | -9 (3)  | 6 (3)   |
| C45 | 31 (3) | 14 (2) | 20 (3) | 0 (2)     | 0 (2)   | -1 (2)  |
| C46 | 36 (3) | 22 (3) | 35 (3) | -10 (2)   | 2 (3)   | -5 (2)  |
| C47 | 37 (4) | 29 (3) | 44 (4) | -10 (3)   | 4 (3)   | -10 (3) |
| C48 | 59 (5) | 26 (3) | 34 (3) | -9 (3)    | 3 (3)   | -22 (3) |
| C49 | 64 (5) | 20 (3) | 38 (4) | -13 (3)   | 10 (3)  | -9 (3)  |
| C50 | 46 (4) | 24 (3) | 29 (3) | -8 (2)    | 9 (3)   | -7 (3)  |

#### Bond Lengths for xstr0167.

| Atom | Atom | Length/Å    | Atom | Atom | Length/Å   |
|------|------|-------------|------|------|------------|
| Fe1  | Fe2  | 2.6253 (10) | C11  | C16  | 1.386 (8)  |
| Fe1  | S1   | 2.2568 (14) | C12  | C13  | 1.393 (8)  |
| Fe1  | S2   | 2.2552 (14) | C13  | C14  | 1.386 (10) |
| Fe1  | P1   | 2.2431 (15) | C14  | C15  | 1.393 (10) |
| Fe1  | C0AA | 1.764 (6)   | C15  | C16  | 1.375 (8)  |
| Fe1  | C2   | 1.777 (5)   | C17  | C18  | 1.440 (8)  |
| Fe2  | S1   | 2.2700 (14) | C17  | C21  | 1.437 (8)  |
| Fe2  | S2   | 2.2783 (14) | C18  | C19  | 1.426 (8)  |
| Fe2  | P2   | 2.2595 (14) | C19  | C20  | 1.409 (9)  |
| Fe2  | C3   | 1.782 (6)   | C20  | C21  | 1.416 (8)  |
| Fe2  | C4   | 1.790 (6)   | C22  | C23  | 1.443 (8)  |
| Fe3  | C17  | 2.044 (5)   | C22  | C26  | 1.450 (7)  |
| Fe3  | C18  | 2.042 (6)   | C23  | C24  | 1.398 (8)  |

|     |      |            |     |     |            |
|-----|------|------------|-----|-----|------------|
| Fe3 | C19  | 2.048 (6)  | C24 | C25 | 1.415 (9)  |
| Fe3 | C20  | 2.053 (6)  | C25 | C26 | 1.409 (9)  |
| Fe3 | C21  | 2.049 (6)  | C27 | C28 | 1.385 (8)  |
| Fe3 | C22  | 2.036 (5)  | C27 | C32 | 1.401 (8)  |
| Fe3 | C23  | 2.050 (5)  | C28 | C29 | 1.395 (8)  |
| Fe3 | C24  | 2.062 (6)  | C29 | C30 | 1.380 (10) |
| Fe3 | C25  | 2.048 (6)  | C30 | C31 | 1.365 (10) |
| Fe3 | C26  | 2.027 (5)  | C31 | C32 | 1.387 (9)  |
| S1  | C5   | 1.784 (5)  | C33 | C34 | 1.399 (9)  |
| S2  | C11  | 1.796 (6)  | C33 | C38 | 1.413 (9)  |
| P1  | C17  | 1.816 (5)  | C34 | C35 | 1.400 (9)  |
| P1  | C39  | 1.826 (6)  | C35 | C36 | 1.386 (12) |
| P1  | C45  | 1.846 (6)  | C36 | C37 | 1.366 (12) |
| P2  | C22  | 1.805 (6)  | C37 | C38 | 1.384 (9)  |
| P2  | C27  | 1.840 (6)  | C39 | C40 | 1.408 (9)  |
| P2  | C33  | 1.838 (5)  | C39 | C44 | 1.395 (9)  |
| O1  | C0AA | 1.158 (7)  | C40 | C41 | 1.363 (11) |
| O2  | C2   | 1.150 (7)  | C41 | C42 | 1.396 (14) |
| O3  | C3   | 1.144 (7)  | C42 | C43 | 1.386 (12) |
| O4  | C4   | 1.137 (7)  | C43 | C44 | 1.392 (9)  |
| C5  | C6   | 1.388 (8)  | C45 | C46 | 1.391 (9)  |
| C5  | C10  | 1.375 (8)  | C45 | C50 | 1.394 (8)  |
| C6  | C7   | 1.406 (9)  | C46 | C47 | 1.385 (9)  |
| C7  | C8   | 1.360 (12) | C47 | C48 | 1.389 (10) |
| C8  | C9   | 1.366 (11) | C48 | C49 | 1.363 (11) |
| C9  | C10  | 1.392 (9)  | C49 | C50 | 1.401 (9)  |
| C11 | C12  | 1.395 (8)  |     |     |            |

#### Bond Angles for xstr0167.

| Atom | Atom | Atom | Angle/°     | Atom | Atom | Atom | Angle/°     |
|------|------|------|-------------|------|------|------|-------------|
| S1   | Fe1  | Fe2  | 54.79 (4)   | C33  | P2   | Fe2  | 108.24 (17) |
| S2   | Fe1  | Fe2  | 55.03 (4)   | C33  | P2   | C27  | 99.6 (3)    |
| S2   | Fe1  | S1   | 79.25 (5)   | O1   | C0AA | Fe1  | 176.6 (5)   |
| P1   | Fe1  | Fe2  | 119.05 (5)  | O2   | C2   | Fe1  | 174.4 (5)   |
| P1   | Fe1  | S1   | 169.55 (6)  | O3   | C3   | Fe2  | 179.6 (5)   |
| P1   | Fe1  | S2   | 90.31 (5)   | O4   | C4   | Fe2  | 176.2 (5)   |
| C0AA | Fe1  | Fe2  | 91.16 (18)  | C6   | C5   | S1   | 119.4 (4)   |
| C0AA | Fe1  | S1   | 93.96 (18)  | C10  | C5   | S1   | 120.2 (4)   |
| C0AA | Fe1  | S2   | 142.87 (18) | C10  | C5   | C6   | 119.8 (5)   |
| C0AA | Fe1  | P1   | 94.63 (18)  | C5   | C6   | C7   | 118.9 (6)   |
| C0AA | Fe1  | C2   | 97.8 (3)    | C8   | C7   | C6   | 120.6 (7)   |
| C2   | Fe1  | Fe2  | 149.35 (18) | C7   | C8   | C9   | 120.4 (6)   |
| C2   | Fe1  | S1   | 95.22 (18)  | C8   | C9   | C10  | 120.0 (6)   |

|     |     |     |             |     |     |     |           |
|-----|-----|-----|-------------|-----|-----|-----|-----------|
| C2  | Fe1 | S2  | 119.04 (19) | C5  | C10 | C9  | 120.3 (6) |
| C2  | Fe1 | P1  | 89.49 (18)  | C12 | C11 | S2  | 121.8 (4) |
| S1  | Fe2 | Fe1 | 54.32 (4)   | C16 | C11 | S2  | 118.8 (4) |
| S1  | Fe2 | S2  | 78.49 (5)   | C16 | C11 | C12 | 119.3 (5) |
| S2  | Fe2 | Fe1 | 54.20 (4)   | C13 | C12 | C11 | 119.3 (5) |
| P2  | Fe2 | Fe1 | 118.75 (5)  | C14 | C13 | C12 | 121.1 (6) |
| P2  | Fe2 | S1  | 172.49 (6)  | C13 | C14 | C15 | 119.1 (6) |
| P2  | Fe2 | S2  | 99.80 (5)   | C16 | C15 | C14 | 120.0 (6) |
| C3  | Fe2 | Fe1 | 99.00 (17)  | C15 | C16 | C11 | 121.2 (5) |
| C3  | Fe2 | S1  | 92.45 (17)  | P1  | C17 | Fe3 | 131.5 (3) |
| C3  | Fe2 | S2  | 151.99 (18) | C18 | C17 | Fe3 | 69.3 (3)  |
| C3  | Fe2 | P2  | 85.72 (17)  | C18 | C17 | P1  | 128.5 (4) |
| C3  | Fe2 | C4  | 103.0 (3)   | C21 | C17 | Fe3 | 69.7 (3)  |
| C4  | Fe2 | Fe1 | 142.43 (18) | C21 | C17 | P1  | 124.4 (4) |
| C4  | Fe2 | S1  | 94.40 (17)  | C21 | C17 | C18 | 106.6 (5) |
| C4  | Fe2 | S2  | 104.07 (18) | C17 | C18 | Fe3 | 69.4 (3)  |
| C4  | Fe2 | P2  | 93.11 (18)  | C19 | C18 | Fe3 | 69.8 (3)  |
| C17 | Fe3 | C19 | 69.2 (2)    | C19 | C18 | C17 | 108.2 (5) |
| C17 | Fe3 | C20 | 68.8 (2)    | C18 | C19 | Fe3 | 69.4 (3)  |
| C17 | Fe3 | C21 | 41.1 (2)    | C20 | C19 | Fe3 | 70.1 (3)  |
| C17 | Fe3 | C23 | 109.9 (2)   | C20 | C19 | C18 | 108.0 (5) |
| C17 | Fe3 | C24 | 125.6 (2)   | C19 | C20 | Fe3 | 69.7 (3)  |
| C17 | Fe3 | C25 | 160.4 (2)   | C19 | C20 | C21 | 108.8 (5) |
| C18 | Fe3 | C17 | 41.3 (2)    | C21 | C20 | Fe3 | 69.7 (3)  |
| C18 | Fe3 | C19 | 40.8 (2)    | C17 | C21 | Fe3 | 69.2 (3)  |
| C18 | Fe3 | C20 | 68.1 (2)    | C20 | C21 | Fe3 | 70.0 (3)  |
| C18 | Fe3 | C21 | 68.6 (2)    | C20 | C21 | C17 | 108.3 (5) |
| C18 | Fe3 | C23 | 124.0 (2)   | P2  | C22 | Fe3 | 125.4 (3) |
| C18 | Fe3 | C24 | 108.8 (3)   | C23 | C22 | Fe3 | 69.8 (3)  |
| C18 | Fe3 | C25 | 122.4 (2)   | C23 | C22 | P2  | 124.7 (4) |
| C19 | Fe3 | C20 | 40.2 (3)    | C23 | C22 | C26 | 106.0 (5) |
| C19 | Fe3 | C21 | 68.2 (2)    | C26 | C22 | Fe3 | 68.8 (3)  |
| C19 | Fe3 | C23 | 158.2 (3)   | C26 | C22 | P2  | 129.3 (4) |
| C19 | Fe3 | C24 | 121.9 (3)   | C22 | C23 | Fe3 | 68.8 (3)  |
| C19 | Fe3 | C25 | 105.3 (2)   | C24 | C23 | Fe3 | 70.6 (3)  |
| C20 | Fe3 | C24 | 156.2 (2)   | C24 | C23 | C22 | 108.6 (5) |
| C21 | Fe3 | C20 | 40.4 (2)    | C23 | C24 | Fe3 | 69.7 (3)  |
| C21 | Fe3 | C23 | 126.3 (2)   | C23 | C24 | C25 | 108.9 (5) |
| C21 | Fe3 | C24 | 162.6 (2)   | C25 | C24 | Fe3 | 69.3 (3)  |
| C22 | Fe3 | C17 | 123.1 (2)   | C24 | C25 | Fe3 | 70.4 (3)  |
| C22 | Fe3 | C18 | 160.1 (2)   | C26 | C25 | Fe3 | 69.0 (3)  |
| C22 | Fe3 | C19 | 157.8 (2)   | C26 | C25 | C24 | 108.3 (5) |
| C22 | Fe3 | C20 | 122.6 (2)   | C22 | C26 | Fe3 | 69.4 (3)  |
| C22 | Fe3 | C21 | 107.7 (2)   | C25 | C26 | Fe3 | 70.6 (3)  |
| C22 | Fe3 | C23 | 41.4 (2)    | C25 | C26 | C22 | 108.2 (5) |

|     |     |     |             |     |     |     |           |
|-----|-----|-----|-------------|-----|-----|-----|-----------|
| C22 | Fe3 | C24 | 68.5 (2)    | C28 | C27 | P2  | 121.9 (4) |
| C22 | Fe3 | C25 | 69.1 (2)    | C28 | C27 | C32 | 118.9 (5) |
| C23 | Fe3 | C20 | 161.3 (2)   | C32 | C27 | P2  | 119.2 (4) |
| C23 | Fe3 | C24 | 39.7 (2)    | C27 | C28 | C29 | 120.2 (5) |
| C25 | Fe3 | C20 | 119.9 (2)   | C30 | C29 | C28 | 119.9 (6) |
| C25 | Fe3 | C21 | 156.0 (2)   | C31 | C30 | C29 | 120.4 (6) |
| C25 | Fe3 | C23 | 67.9 (2)    | C30 | C31 | C32 | 120.4 (6) |
| C25 | Fe3 | C24 | 40.3 (2)    | C31 | C32 | C27 | 120.1 (6) |
| C26 | Fe3 | C17 | 158.7 (2)   | C34 | C33 | P2  | 122.2 (5) |
| C26 | Fe3 | C18 | 157.2 (2)   | C34 | C33 | C38 | 118.5 (5) |
| C26 | Fe3 | C19 | 120.2 (2)   | C38 | C33 | P2  | 119.2 (5) |
| C26 | Fe3 | C20 | 105.2 (2)   | C33 | C34 | C35 | 119.6 (7) |
| C26 | Fe3 | C21 | 121.3 (2)   | C36 | C35 | C34 | 120.6 (7) |
| C26 | Fe3 | C22 | 41.8 (2)    | C37 | C36 | C35 | 120.0 (6) |
| C26 | Fe3 | C23 | 69.0 (2)    | C36 | C37 | C38 | 120.7 (7) |
| C26 | Fe3 | C24 | 68.1 (2)    | C37 | C38 | C33 | 120.5 (7) |
| C26 | Fe3 | C25 | 40.5 (2)    | C40 | C39 | P1  | 121.9 (5) |
| Fe1 | S1  | Fe2 | 70.89 (4)   | C44 | C39 | P1  | 119.6 (5) |
| C5  | S1  | Fe1 | 114.91 (18) | C44 | C39 | C40 | 118.4 (6) |
| C5  | S1  | Fe2 | 115.17 (18) | C41 | C40 | C39 | 120.2 (8) |
| Fe1 | S2  | Fe2 | 70.77 (4)   | C40 | C41 | C42 | 121.3 (7) |
| C11 | S2  | Fe1 | 114.63 (18) | C43 | C42 | C41 | 119.4 (7) |
| C11 | S2  | Fe2 | 108.39 (18) | C42 | C43 | C44 | 119.5 (8) |
| C17 | P1  | Fe1 | 123.80 (18) | C43 | C44 | C39 | 121.2 (7) |
| C17 | P1  | C39 | 102.3 (3)   | C46 | C45 | P1  | 121.3 (4) |
| C17 | P1  | C45 | 98.4 (2)    | C46 | C45 | C50 | 118.9 (5) |
| C39 | P1  | Fe1 | 111.97 (19) | C50 | C45 | P1  | 119.9 (5) |
| C39 | P1  | C45 | 103.7 (3)   | C47 | C46 | C45 | 120.6 (6) |
| C45 | P1  | Fe1 | 114.06 (19) | C46 | C47 | C48 | 120.3 (6) |
| C22 | P2  | Fe2 | 117.15 (18) | C49 | C48 | C47 | 119.5 (6) |
| C22 | P2  | C27 | 103.2 (2)   | C48 | C49 | C50 | 121.0 (6) |
| C22 | P2  | C33 | 101.9 (3)   | C45 | C50 | C49 | 119.7 (6) |
| C27 | P2  | Fe2 | 123.40 (19) |     |     |     |           |

**Hydrogen Atom Coordinates ( $\text{\AA}\times 10^4$ ) and Isotropic Displacement Parameters ( $\text{\AA}^2\times 10^3$ ) for xstr0167.**

| Atom | x       | y        | z        | U(eq) |
|------|---------|----------|----------|-------|
| H6   | 6745.1  | 7637.27  | 10256.45 | 37    |
| H7   | 7257.83 | 8456.25  | 11152.64 | 55    |
| H8   | 7174.63 | 10351.88 | 10968.94 | 55    |
| H9   | 6641.66 | 11474.46 | 9888.07  | 43    |
| H10  | 6129.5  | 10688.87 | 8987.87  | 34    |
| H12  | 4258.86 | 6558.09  | 9027.04  | 29    |



|     |          |          |         |    |
|-----|----------|----------|---------|----|
| H13 | 2272.43  | 6753.81  | 9407.95 | 38 |
| H14 | 1087.6   | 8001.53  | 8666.79 | 44 |
| H15 | 1898.83  | 9032.97  | 7512.96 | 41 |
| H16 | 3855.3   | 8796.6   | 7114.92 | 29 |
| H18 | 10201.98 | 4958.22  | 7006.59 | 30 |
| H19 | 10342.38 | 5432.56  | 5601.25 | 34 |
| H20 | 8488.31  | 6492.01  | 5272.08 | 31 |
| H21 | 7185.98  | 6709.58  | 6456.52 | 25 |
| H23 | 9486.18  | 8144.7   | 7438.09 | 26 |
| H24 | 11377.87 | 7361.48  | 6864.29 | 33 |
| H25 | 11427.53 | 7743.81  | 5476.43 | 33 |
| H26 | 9553.03  | 8788.02  | 5170.26 | 27 |
| H28 | 5682.94  | 8305.33  | 6214.89 | 28 |
| H29 | 5003.28  | 8115.53  | 5154.39 | 40 |
| H30 | 5909.31  | 8923.34  | 3978.02 | 45 |
| H31 | 7430.86  | 9974.61  | 3848.18 | 42 |
| H32 | 8099.9   | 10208.88 | 4895.44 | 33 |
| H34 | 9507.62  | 10714.1  | 6449.57 | 37 |
| H35 | 9731.76  | 12618.26 | 6147.83 | 53 |
| H36 | 8218.83  | 13896.92 | 5786.21 | 55 |
| H37 | 6520.96  | 13295.83 | 5651.61 | 51 |
| H38 | 6268.29  | 11417.92 | 5926.26 | 37 |
| H40 | 8285.21  | 3516.06  | 9091.89 | 53 |
| H41 | 9741.52  | 2732.59  | 9765.62 | 69 |
| H42 | 11452.9  | 3576.78  | 9584.39 | 70 |
| H43 | 11680.48 | 5258.36  | 8717    | 54 |
| H44 | 10176.26 | 6099.47  | 8067.81 | 40 |
| H46 | 5483.04  | 5159.51  | 8622.72 | 37 |
| H47 | 4344.13  | 3748.47  | 8670.21 | 44 |
| H48 | 5086.57  | 2277.5   | 8103.55 | 46 |
| H49 | 6975.97  | 2193.88  | 7535.9  | 50 |
| H50 | 8157.68  | 3579.12  | 7508.73 | 41 |

## Crystal data and structure refinement for 4c

|                                             |                                                                                                             |
|---------------------------------------------|-------------------------------------------------------------------------------------------------------------|
| Identification code                         | xstr0193                                                                                                    |
| Empirical formula                           | C <sub>50</sub> H <sub>40</sub> Fe <sub>3</sub> N <sub>2</sub> O <sub>4</sub> P <sub>2</sub> S <sub>2</sub> |
| Formula weight                              | 1026.45                                                                                                     |
| Temperature/K                               | 132(2)                                                                                                      |
| Crystal system                              | triclinic                                                                                                   |
| Space group                                 | P-1                                                                                                         |
| a/Å                                         | 12.2873(6)                                                                                                  |
| b/Å                                         | 12.6980(6)                                                                                                  |
| c/Å                                         | 18.6853(9)                                                                                                  |
| α/°                                         | 79.137(4)                                                                                                   |
| β/°                                         | 74.698(4)                                                                                                   |
| γ/°                                         | 83.481(4)                                                                                                   |
| Volume/Å <sup>3</sup>                       | 2755.3(2)                                                                                                   |
| Z                                           | 2                                                                                                           |
| ρ <sub>calc</sub> /g/cm <sup>3</sup>        | 1.237                                                                                                       |
| μ/mm <sup>-1</sup>                          | 0.953                                                                                                       |
| F(000)                                      | 1052.0                                                                                                      |
| Crystal size/mm <sup>3</sup>                | 0.2165 × 0.1939 × 0.1504                                                                                    |
| Radiation                                   | MoKα (λ = 0.71073)                                                                                          |
| 2Θ range for data collection/°              | 6.7 to 51.998                                                                                               |
| Index ranges                                | -14 ≤ h ≤ 15, -12 ≤ k ≤ 15, -23 ≤ l ≤ 21                                                                    |
| Reflections collected                       | 16932                                                                                                       |
| Independent reflections                     | 10695 [R <sub>int</sub> = 0.0330, R <sub>sigma</sub> = 0.0620]                                              |
| Data/restraints/parameters                  | 10695/0/570                                                                                                 |
| Goodness-of-fit on F <sup>2</sup>           | 1.080                                                                                                       |
| Final R indexes [I >= 2σ (I)]               | R <sub>1</sub> = 0.0677, wR <sub>2</sub> = 0.1939                                                           |
| Final R indexes [all data]                  | R <sub>1</sub> = 0.0857, wR <sub>2</sub> = 0.2132                                                           |
| Largest diff. peak/hole / e Å <sup>-3</sup> | 2.09/-0.53                                                                                                  |

## Fractional Atomic Coordinates (×10<sup>4</sup>) and Equivalent Isotropic Displacement Parameters (Å<sup>2</sup>×10<sup>3</sup>) for xstr0193. U<sub>eq</sub> is defined as 1/3 of the trace of the orthogonalised U<sub>ij</sub> tensor.

| Atom | x           | y           | z          | U(eq)      |
|------|-------------|-------------|------------|------------|
| Fe1  | 1055.0 (6)  | 3411.7 (5)  | 2399.0 (4) | 16.81 (18) |
| Fe2  | 3076.4 (6)  | 3136.8 (5)  | 1508.8 (4) | 16.36 (18) |
| Fe3  | 2990.5 (6)  | 682.0 (5)   | 3657.8 (4) | 20.16 (19) |
| S1   | 2639.1 (10) | 4165.0 (9)  | 2416.6 (6) | 17.5 (3)   |
| S2   | 1631.7 (10) | 4202.2 (9)  | 1175.8 (6) | 17.9 (3)   |
| P1   | 679.1 (10)  | 2439.0 (10) | 3571.6 (7) | 18.7 (3)   |
| P2   | 4480.5 (10) | 2280.5 (10) | 2002.5 (7) | 18.7 (3)   |
| O1   | -732 (3)    | 5112 (3)    | 2749 (2)   | 30.8 (9)   |
| O2   | -131 (3)    | 1819 (3)    | 2002 (2)   | 31.2 (9)   |

|     |           |          |           |           |
|-----|-----------|----------|-----------|-----------|
| O3  | 4643 (3)  | 3803 (3) | 57 (2)    | 37.2 (9)  |
| O4  | 2462 (3)  | 1264 (3) | 1054 (2)  | 29.7 (8)  |
| N1  | 2542 (5)  | 8962 (4) | 1524 (3)  | 35.8 (11) |
| N2  | -393 (6)  | 3049 (4) | -1133 (3) | 50.1 (15) |
| C1  | -49 (4)   | 4419 (4) | 2641 (3)  | 21.7 (10) |
| C2  | 338 (4)   | 2432 (4) | 2154 (3)  | 22.5 (10) |
| C3  | 4074 (4)  | 3564 (4) | 649 (3)   | 23.4 (10) |
| C4  | 2709 (4)  | 1985 (4) | 1251 (3)  | 20.6 (10) |
| C5  | 2539 (4)  | 5584 (4) | 2094 (3)  | 18.2 (9)  |
| C6  | 3200 (4)  | 6072 (4) | 1410 (3)  | 22.8 (10) |
| C7  | 3193 (5)  | 7177 (4) | 1217 (3)  | 26.3 (11) |
| C8  | 2512 (5)  | 7854 (4) | 1696 (3)  | 26.9 (11) |
| C9  | 1831 (5)  | 7362 (4) | 2375 (3)  | 28.5 (12) |
| C10 | 1844 (4)  | 6245 (4) | 2572 (3)  | 23.8 (11) |
| C11 | 1036 (4)  | 3714 (4) | 537 (3)   | 19.6 (10) |
| C12 | 1721 (5)  | 3371 (4) | -106 (3)  | 26.3 (11) |
| C13 | 1244 (5)  | 3158 (5) | -660 (3)  | 32.8 (13) |
| C14 | 93 (5)    | 3269 (4) | -575 (3)  | 30.7 (12) |
| C15 | -603 (5)  | 3576 (4) | 91 (3)    | 30.2 (12) |
| C16 | -132 (5)  | 3816 (4) | 632 (3)   | 25.7 (11) |
| C17 | 1337 (4)  | 1079 (4) | 3685 (3)  | 20.0 (10) |
| C18 | 1445 (4)  | 345 (4)  | 4357 (3)  | 24.3 (11) |
| C19 | 2035 (5)  | -608 (4) | 4147 (3)  | 27.4 (11) |
| C20 | 2287 (5)  | -506 (4) | 3345 (3)  | 25.4 (11) |
| C21 | 1857 (4)  | 524 (4)  | 3063 (3)  | 22.1 (10) |
| C22 | 4261 (4)  | 1578 (4) | 2970 (3)  | 21.5 (10) |
| C23 | 4704 (4)  | 523 (4)  | 3251 (3)  | 25.3 (11) |
| C24 | 4431 (4)  | 388 (4)  | 4043 (3)  | 26.6 (11) |
| C25 | 3819 (5)  | 1336 (4) | 4271 (3)  | 29.0 (12) |
| C26 | 3726 (4)  | 2074 (4) | 3617 (3)  | 22.6 (10) |
| C27 | -837 (4)  | 2176 (4) | 3868 (3)  | 23.1 (10) |
| C28 | -1230 (5) | 1251 (5) | 3774 (3)  | 31.2 (12) |
| C29 | -2379 (5) | 1109 (5) | 3952 (3)  | 39.8 (15) |
| C30 | -3159 (5) | 1933 (6) | 4213 (3)  | 46.6 (17) |
| C31 | -2780 (5) | 2864 (6) | 4313 (3)  | 39.9 (14) |
| C32 | -1630 (5) | 2992 (5) | 4142 (3)  | 33.7 (13) |
| C33 | 809 (4)   | 2968 (4) | 4397 (3)  | 24.6 (11) |
| C34 | 308 (5)   | 2455 (5) | 5123 (3)  | 31.1 (12) |
| C35 | 436 (6)   | 2830 (6) | 5747 (3)  | 44.3 (16) |
| C36 | 1034 (6)  | 3721 (6) | 5654 (3)  | 47.0 (17) |
| C37 | 1497 (6)  | 4256 (5) | 4943 (3)  | 41.0 (15) |
| C38 | 1399 (5)  | 3874 (5) | 4317 (3)  | 30.0 (12) |
| C39 | 5282 (4)  | 1266 (4) | 1459 (3)  | 25.1 (11) |
| C40 | 6322 (5)  | 1465 (5) | 946 (3)   | 34.4 (13) |
| C41 | 6901 (6)  | 699 (6)  | 520 (4)   | 48.7 (18) |

|     |          |          |          |           |
|-----|----------|----------|----------|-----------|
| C42 | 6436 (6) | -283 (6) | 600 (4)  | 49.5 (18) |
| C43 | 5411 (6) | -479 (5) | 1095 (3) | 40.9 (15) |
| C44 | 4823 (5) | 285 (4)  | 1520 (3) | 32.9 (13) |
| C45 | 5584 (4) | 3155 (4) | 1997 (3) | 24.0 (11) |
| C46 | 5580 (5) | 4217 (5) | 1640 (3) | 31.9 (12) |
| C47 | 6415 (5) | 4876 (5) | 1642 (3) | 36.7 (13) |
| C48 | 7248 (5) | 4475 (5) | 2006 (3) | 35.7 (13) |
| C49 | 7264 (5) | 3415 (5) | 2359 (3) | 37.4 (14) |
| C50 | 6444 (5) | 2758 (5) | 2352 (3) | 30.3 (12) |

**Anisotropic Displacement Parameters ( $\text{\AA}^2 \times 10^3$ ) for xstr0193. The Anisotropic displacement factor exponent takes the form:  $-2\pi^2[h^2a^2U_{11}+2hka^*b^*U_{12}+\dots]$ .**

| Atom | $U_{11}$ | $U_{22}$  | $U_{33}$ | $U_{23}$   | $U_{13}$   | $U_{12}$   |
|------|----------|-----------|----------|------------|------------|------------|
| Fe1  | 17.7 (4) | 17.0 (3)  | 16.1 (3) | -4.4 (3)   | -3.9 (3)   | -0.4 (3)   |
| Fe2  | 17.4 (4) | 16.5 (3)  | 15.1 (3) | -4.0 (3)   | -3.5 (3)   | 0.3 (3)    |
| Fe3  | 21.5 (4) | 20.6 (4)  | 18.3 (4) | -0.7 (3)   | -6.3 (3)   | -2.4 (3)   |
| S1   | 19.3 (6) | 17.8 (6)  | 16.1 (5) | -5.0 (4)   | -3.8 (4)   | -1.2 (4)   |
| S2   | 20.2 (6) | 16.8 (6)  | 17.2 (6) | -4.0 (4)   | -5.3 (5)   | 0.6 (4)    |
| P1   | 18.0 (6) | 22.0 (6)  | 16.6 (6) | -4.4 (5)   | -4.0 (5)   | -2.6 (5)   |
| P2   | 18.4 (6) | 19.4 (6)  | 17.6 (6) | -3.5 (5)   | -4.3 (5)   | 1.5 (5)    |
| O1   | 25 (2)   | 29 (2)    | 42 (2)   | -17.3 (17) | -10.2 (17) | 10.7 (16)  |
| O2   | 39 (2)   | 31 (2)    | 29 (2)   | -6.6 (16)  | -12.4 (17) | -12.9 (18) |
| O3   | 33 (2)   | 45 (2)    | 25 (2)   | -1.7 (17)  | 5.5 (17)   | -6.4 (18)  |
| O4   | 42 (2)   | 18.9 (18) | 31 (2)   | -9.0 (15)  | -11.7 (17) | 0.0 (16)   |
| N1   | 51 (3)   | 20 (2)    | 37 (3)   | -7.3 (19)  | -9 (2)     | -4 (2)     |
| N2   | 71 (4)   | 40 (3)    | 57 (4)   | -19 (3)    | -42 (3)    | 4 (3)      |
| C1   | 26 (3)   | 22 (2)    | 20 (2)   | -5.5 (19)  | -8 (2)     | -6 (2)     |
| C2   | 27 (3)   | 23 (3)    | 16 (2)   | 1.5 (19)   | -6 (2)     | 1 (2)      |
| C3   | 24 (3)   | 22 (2)    | 23 (3)   | -3 (2)     | -5 (2)     | 2 (2)      |
| C4   | 18 (2)   | 24 (3)    | 19 (2)   | -3.4 (19)  | -5.1 (19)  | 2.3 (19)   |
| C5   | 21 (2)   | 17 (2)    | 19 (2)   | -6.6 (18)  | -6.3 (19)  | 0.7 (18)   |
| C6   | 24 (3)   | 23 (3)    | 21 (2)   | -6 (2)     | -3 (2)     | -2 (2)     |
| C7   | 30 (3)   | 26 (3)    | 21 (2)   | -5 (2)     | -1 (2)     | -5 (2)     |
| C8   | 34 (3)   | 20 (2)    | 31 (3)   | -5 (2)     | -13 (2)    | -3 (2)     |
| C9   | 36 (3)   | 23 (3)    | 28 (3)   | -14 (2)    | -5 (2)     | 4 (2)      |
| C10  | 28 (3)   | 22 (2)    | 21 (2)   | -7 (2)     | -1 (2)     | -6 (2)     |
| C11  | 25 (3)   | 15 (2)    | 21 (2)   | -0.2 (18)  | -9 (2)     | -3.7 (19)  |
| C12  | 32 (3)   | 26 (3)    | 23 (3)   | -7 (2)     | -8 (2)     | 1 (2)      |
| C13  | 39 (3)   | 35 (3)    | 28 (3)   | -14 (2)    | -12 (2)    | 6 (3)      |
| C14  | 46 (3)   | 20 (3)    | 34 (3)   | -4 (2)     | -25 (3)    | 0 (2)      |
| C15  | 29 (3)   | 28 (3)    | 39 (3)   | 3 (2)      | -21 (3)    | -6 (2)     |
| C16  | 31 (3)   | 25 (3)    | 21 (3)   | 0 (2)      | -10 (2)    | -3 (2)     |
| C17  | 21 (2)   | 23 (2)    | 18 (2)   | -2.0 (19)  | -6.9 (19)  | -6.3 (19)  |

|     |        |        |        |           |           |         |
|-----|--------|--------|--------|-----------|-----------|---------|
| C18 | 24 (3) | 29 (3) | 19 (2) | -1 (2)    | -5 (2)    | -3 (2)  |
| C19 | 28 (3) | 25 (3) | 30 (3) | 4 (2)     | -13 (2)   | -8 (2)  |
| C20 | 28 (3) | 19 (2) | 31 (3) | -3 (2)    | -11 (2)   | -5 (2)  |
| C21 | 24 (3) | 22 (2) | 22 (2) | -3.7 (19) | -9 (2)    | -2 (2)  |
| C22 | 21 (2) | 23 (2) | 21 (2) | -2.5 (19) | -5 (2)    | -4 (2)  |
| C23 | 17 (2) | 26 (3) | 30 (3) | -1 (2)    | -5 (2)    | 0 (2)   |
| C24 | 22 (3) | 30 (3) | 30 (3) | 4 (2)     | -15 (2)   | -3 (2)  |
| C25 | 30 (3) | 39 (3) | 21 (3) | -3 (2)    | -10 (2)   | -10 (2) |
| C26 | 19 (2) | 23 (3) | 27 (3) | -4 (2)    | -5 (2)    | -6 (2)  |
| C27 | 16 (2) | 34 (3) | 17 (2) | -1 (2)    | -0.6 (19) | -8 (2)  |
| C28 | 29 (3) | 41 (3) | 25 (3) | -1 (2)    | -10 (2)   | -11 (2) |
| C29 | 37 (3) | 54 (4) | 31 (3) | 8 (3)     | -15 (3)   | -26 (3) |
| C30 | 20 (3) | 82 (5) | 32 (3) | 14 (3)    | -9 (2)    | -14 (3) |
| C31 | 22 (3) | 57 (4) | 34 (3) | 2 (3)     | -2 (2)    | -2 (3)  |
| C32 | 24 (3) | 38 (3) | 33 (3) | 0 (2)     | -1 (2)    | 1 (2)   |
| C33 | 22 (3) | 34 (3) | 19 (2) | -11 (2)   | -4 (2)    | 1 (2)   |
| C34 | 27 (3) | 42 (3) | 23 (3) | -7 (2)    | -2 (2)    | -4 (2)  |
| C35 | 46 (4) | 65 (4) | 18 (3) | -14 (3)   | 2 (3)     | -6 (3)  |
| C36 | 50 (4) | 67 (5) | 29 (3) | -27 (3)   | -5 (3)    | -7 (3)  |
| C37 | 46 (4) | 50 (4) | 32 (3) | -25 (3)   | -3 (3)    | -10 (3) |
| C38 | 30 (3) | 36 (3) | 26 (3) | -13 (2)   | -4 (2)    | -3 (2)  |
| C39 | 25 (3) | 30 (3) | 20 (2) | -5 (2)    | -8 (2)    | 10 (2)  |
| C40 | 32 (3) | 43 (3) | 27 (3) | -8 (2)    | -6 (2)    | 5 (3)   |
| C41 | 41 (4) | 68 (5) | 32 (3) | -19 (3)   | 0 (3)     | 17 (3)  |
| C42 | 52 (4) | 57 (4) | 40 (4) | -30 (3)   | -8 (3)    | 25 (3)  |
| C43 | 47 (4) | 38 (3) | 41 (3) | -19 (3)   | -17 (3)   | 15 (3)  |
| C44 | 34 (3) | 30 (3) | 33 (3) | -14 (2)   | -6 (2)    | 10 (2)  |
| C45 | 19 (2) | 32 (3) | 21 (2) | -6 (2)    | -1 (2)    | -4 (2)  |
| C46 | 22 (3) | 34 (3) | 40 (3) | 0 (2)     | -11 (2)   | -8 (2)  |
| C47 | 38 (3) | 30 (3) | 43 (3) | 4 (3)     | -14 (3)   | -12 (3) |
| C48 | 24 (3) | 45 (3) | 41 (3) | -5 (3)    | -11 (3)   | -12 (3) |
| C49 | 23 (3) | 54 (4) | 36 (3) | 1 (3)     | -13 (2)   | -7 (3)  |
| C50 | 26 (3) | 37 (3) | 28 (3) | 1 (2)     | -11 (2)   | -4 (2)  |

### Bond Lengths for xstr0193.

| Atom | Atom | Length/Å    | Atom | Atom | Length/Å  |
|------|------|-------------|------|------|-----------|
| Fe1  | Fe2  | 2.6266 (9)  | C11  | C12  | 1.386 (7) |
| Fe1  | S1   | 2.2745 (13) | C11  | C16  | 1.393 (7) |
| Fe1  | S2   | 2.2750 (13) | C12  | C13  | 1.395 (7) |
| Fe1  | P1   | 2.2616 (14) | C13  | C14  | 1.375 (8) |
| Fe1  | C1   | 1.784 (5)   | C14  | C15  | 1.407 (8) |
| Fe1  | C2   | 1.792 (5)   | C15  | C16  | 1.382 (7) |
| Fe2  | S1   | 2.2506 (12) | C17  | C18  | 1.444 (7) |

|     |     |             |     |     |            |
|-----|-----|-------------|-----|-----|------------|
| Fe2 | S2  | 2.2558 (13) | C17 | C21 | 1.438 (7)  |
| Fe2 | P2  | 2.2463 (13) | C18 | C19 | 1.404 (7)  |
| Fe2 | C3  | 1.778 (5)   | C19 | C20 | 1.432 (7)  |
| Fe2 | C4  | 1.762 (5)   | C20 | C21 | 1.413 (7)  |
| Fe3 | C17 | 2.027 (5)   | C22 | C23 | 1.445 (7)  |
| Fe3 | C18 | 2.040 (5)   | C22 | C26 | 1.438 (7)  |
| Fe3 | C19 | 2.050 (5)   | C23 | C24 | 1.411 (7)  |
| Fe3 | C20 | 2.064 (5)   | C24 | C25 | 1.418 (8)  |
| Fe3 | C21 | 2.044 (5)   | C25 | C26 | 1.415 (7)  |
| Fe3 | C22 | 2.044 (5)   | C27 | C28 | 1.377 (8)  |
| Fe3 | C23 | 2.042 (5)   | C27 | C32 | 1.411 (8)  |
| Fe3 | C24 | 2.052 (5)   | C28 | C29 | 1.388 (8)  |
| Fe3 | C25 | 2.050 (5)   | C29 | C30 | 1.403 (10) |
| Fe3 | C26 | 2.055 (5)   | C30 | C31 | 1.380 (10) |
| S1  | C5  | 1.790 (5)   | C31 | C32 | 1.385 (8)  |
| S2  | C11 | 1.786 (5)   | C33 | C34 | 1.400 (7)  |
| P1  | C17 | 1.821 (5)   | C33 | C38 | 1.393 (8)  |
| P1  | C27 | 1.848 (5)   | C34 | C35 | 1.392 (8)  |
| P1  | C33 | 1.844 (5)   | C35 | C36 | 1.377 (9)  |
| P2  | C22 | 1.823 (5)   | C36 | C37 | 1.378 (9)  |
| P2  | C39 | 1.827 (5)   | C37 | C38 | 1.384 (7)  |
| P2  | C45 | 1.845 (5)   | C39 | C40 | 1.398 (8)  |
| O1  | C1  | 1.153 (6)   | C39 | C44 | 1.398 (8)  |
| O2  | C2  | 1.136 (6)   | C40 | C41 | 1.386 (8)  |
| O3  | C3  | 1.148 (6)   | C41 | C42 | 1.396 (11) |
| O4  | C4  | 1.147 (6)   | C42 | C43 | 1.368 (10) |
| N1  | C8  | 1.385 (7)   | C43 | C44 | 1.387 (8)  |
| N2  | C14 | 1.412 (7)   | C45 | C46 | 1.387 (8)  |
| C5  | C6  | 1.395 (7)   | C45 | C50 | 1.391 (7)  |
| C5  | C10 | 1.395 (6)   | C46 | C47 | 1.396 (8)  |
| C6  | C7  | 1.380 (7)   | C47 | C48 | 1.375 (8)  |
| C7  | C8  | 1.405 (7)   | C48 | C49 | 1.384 (9)  |
| C8  | C9  | 1.400 (8)   | C49 | C50 | 1.383 (8)  |
| C9  | C10 | 1.396 (7)   |     |     |            |

### Bond Angles for xstr0193.

| Atom | Atom | Atom | Angle/°    | Atom | Atom | Atom | Angle/°   |
|------|------|------|------------|------|------|------|-----------|
| S1   | Fe1  | Fe2  | 54.09 (3)  | O1   | C1   | Fe1  | 175.2 (5) |
| S1   | Fe1  | S2   | 78.98 (5)  | O2   | C2   | Fe1  | 178.9 (5) |
| S2   | Fe1  | Fe2  | 54.23 (3)  | O3   | C3   | Fe2  | 172.7 (5) |
| P1   | Fe1  | Fe2  | 118.22 (4) | O4   | C4   | Fe2  | 176.9 (4) |
| P1   | Fe1  | S1   | 99.20 (5)  | C6   | C5   | S1   | 122.8 (4) |
| P1   | Fe1  | S2   | 171.76 (5) | C6   | C5   | C10  | 118.0 (4) |

|     |     |     |             |     |     |     |           |
|-----|-----|-----|-------------|-----|-----|-----|-----------|
| C1  | Fe1 | Fe2 | 142.03 (16) | C10 | C5  | S1  | 118.9 (4) |
| C1  | Fe1 | S1  | 103.64 (16) | C7  | C6  | C5  | 121.2 (5) |
| C1  | Fe1 | S2  | 94.62 (16)  | C6  | C7  | C8  | 121.5 (5) |
| C1  | Fe1 | P1  | 93.62 (16)  | N1  | C8  | C7  | 121.9 (5) |
| C1  | Fe1 | C2  | 102.6 (2)   | N1  | C8  | C9  | 120.9 (5) |
| C2  | Fe1 | Fe2 | 99.79 (16)  | C9  | C8  | C7  | 117.2 (5) |
| C2  | Fe1 | S1  | 152.75 (17) | C10 | C9  | C8  | 121.2 (5) |
| C2  | Fe1 | S2  | 91.84 (15)  | C5  | C10 | C9  | 120.8 (5) |
| C2  | Fe1 | P1  | 86.21 (15)  | C12 | C11 | S2  | 120.9 (4) |
| S1  | Fe2 | Fe1 | 54.94 (4)   | C12 | C11 | C16 | 119.2 (4) |
| S1  | Fe2 | S2  | 79.88 (5)   | C16 | C11 | S2  | 119.3 (4) |
| S2  | Fe2 | Fe1 | 54.91 (4)   | C11 | C12 | C13 | 120.2 (5) |
| P2  | Fe2 | Fe1 | 119.25 (4)  | C14 | C13 | C12 | 121.0 (5) |
| P2  | Fe2 | S1  | 89.31 (5)   | C13 | C14 | N2  | 121.1 (6) |
| P2  | Fe2 | S2  | 169.12 (5)  | C13 | C14 | C15 | 118.7 (5) |
| C3  | Fe2 | Fe1 | 148.39 (16) | C15 | C14 | N2  | 120.2 (6) |
| C3  | Fe2 | S1  | 119.51 (17) | C16 | C15 | C14 | 120.4 (5) |
| C3  | Fe2 | S2  | 94.10 (16)  | C15 | C16 | C11 | 120.4 (5) |
| C3  | Fe2 | P2  | 90.14 (16)  | P1  | C17 | Fe3 | 125.8 (3) |
| C4  | Fe2 | Fe1 | 92.09 (16)  | C18 | C17 | Fe3 | 69.7 (3)  |
| C4  | Fe2 | S1  | 143.35 (16) | C18 | C17 | P1  | 130.3 (4) |
| C4  | Fe2 | S2  | 94.39 (15)  | C21 | C17 | Fe3 | 70.0 (3)  |
| C4  | Fe2 | P2  | 95.04 (15)  | C21 | C17 | P1  | 123.3 (4) |
| C4  | Fe2 | C3  | 96.9 (2)    | C21 | C17 | C18 | 106.4 (4) |
| C17 | Fe3 | C18 | 41.60 (19)  | C17 | C18 | Fe3 | 68.7 (3)  |
| C17 | Fe3 | C19 | 69.1 (2)    | C19 | C18 | Fe3 | 70.3 (3)  |
| C17 | Fe3 | C20 | 69.0 (2)    | C19 | C18 | C17 | 108.6 (4) |
| C17 | Fe3 | C21 | 41.37 (19)  | C18 | C19 | Fe3 | 69.5 (3)  |
| C17 | Fe3 | C22 | 122.68 (19) | C18 | C19 | C20 | 108.4 (4) |
| C17 | Fe3 | C23 | 160.0 (2)   | C20 | C19 | Fe3 | 70.1 (3)  |
| C17 | Fe3 | C24 | 158.1 (2)   | C19 | C20 | Fe3 | 69.1 (3)  |
| C17 | Fe3 | C25 | 122.1 (2)   | C21 | C20 | Fe3 | 69.1 (3)  |
| C17 | Fe3 | C26 | 107.3 (2)   | C21 | C20 | C19 | 107.8 (5) |
| C18 | Fe3 | C19 | 40.2 (2)    | C17 | C21 | Fe3 | 68.7 (3)  |
| C18 | Fe3 | C20 | 68.2 (2)    | C20 | C21 | Fe3 | 70.6 (3)  |
| C18 | Fe3 | C21 | 68.8 (2)    | C20 | C21 | C17 | 108.8 (4) |
| C18 | Fe3 | C22 | 158.8 (2)   | P2  | C22 | Fe3 | 132.4 (3) |
| C18 | Fe3 | C23 | 157.4 (2)   | C23 | C22 | Fe3 | 69.2 (3)  |
| C18 | Fe3 | C24 | 121.2 (2)   | C23 | C22 | P2  | 129.1 (4) |
| C18 | Fe3 | C25 | 105.7 (2)   | C26 | C22 | Fe3 | 69.9 (3)  |
| C18 | Fe3 | C26 | 121.8 (2)   | C26 | C22 | P2  | 123.9 (4) |
| C19 | Fe3 | C20 | 40.7 (2)    | C26 | C22 | C23 | 106.5 (4) |
| C19 | Fe3 | C24 | 106.1 (2)   | C22 | C23 | Fe3 | 69.4 (3)  |
| C19 | Fe3 | C25 | 120.4 (2)   | C24 | C23 | Fe3 | 70.2 (3)  |
| C19 | Fe3 | C26 | 156.4 (2)   | C24 | C23 | C22 | 108.3 (4) |

|     |     |     |            |     |     |     |          |
|-----|-----|-----|------------|-----|-----|-----|----------|
| C21 | Fe3 | C19 | 68.3(2)    | C23 | C24 | Fe3 | 69.4(3)  |
| C21 | Fe3 | C20 | 40.23(19)  | C23 | C24 | C25 | 108.5(4) |
| C21 | Fe3 | C24 | 158.5(2)   | C25 | C24 | Fe3 | 69.7(3)  |
| C21 | Fe3 | C25 | 160.4(2)   | C24 | C25 | Fe3 | 69.9(3)  |
| C21 | Fe3 | C26 | 125.4(2)   | C26 | C25 | Fe3 | 70.0(3)  |
| C22 | Fe3 | C19 | 160.4(2)   | C26 | C25 | C24 | 108.2(5) |
| C22 | Fe3 | C20 | 124.7(2)   | C22 | C26 | Fe3 | 69.1(3)  |
| C22 | Fe3 | C21 | 109.1(2)   | C25 | C26 | Fe3 | 69.6(3)  |
| C22 | Fe3 | C24 | 68.8(2)    | C25 | C26 | C22 | 108.5(4) |
| C22 | Fe3 | C25 | 68.9(2)    | C28 | C27 | P1  | 122.4(4) |
| C22 | Fe3 | C26 | 41.06(19)  | C28 | C27 | C32 | 118.6(5) |
| C23 | Fe3 | C19 | 122.6(2)   | C32 | C27 | P1  | 118.8(4) |
| C23 | Fe3 | C20 | 108.3(2)   | C27 | C28 | C29 | 121.2(6) |
| C23 | Fe3 | C21 | 123.9(2)   | C28 | C29 | C30 | 119.6(6) |
| C23 | Fe3 | C22 | 41.42(19)  | C31 | C30 | C29 | 119.9(5) |
| C23 | Fe3 | C24 | 40.3(2)    | C30 | C31 | C32 | 119.9(6) |
| C23 | Fe3 | C25 | 68.3(2)    | C31 | C32 | C27 | 120.7(6) |
| C23 | Fe3 | C26 | 68.6(2)    | C34 | C33 | P1  | 119.9(4) |
| C24 | Fe3 | C20 | 122.2(2)   | C38 | C33 | P1  | 121.4(4) |
| C24 | Fe3 | C26 | 67.9(2)    | C38 | C33 | C34 | 118.7(5) |
| C25 | Fe3 | C20 | 156.9(2)   | C35 | C34 | C33 | 120.0(6) |
| C25 | Fe3 | C24 | 40.5(2)    | C36 | C35 | C34 | 120.2(6) |
| C25 | Fe3 | C26 | 40.3(2)    | C35 | C36 | C37 | 120.3(5) |
| C26 | Fe3 | C20 | 161.7(2)   | C36 | C37 | C38 | 120.0(6) |
| Fe2 | S1  | Fe1 | 70.96(4)   | C37 | C38 | C33 | 120.7(5) |
| C5  | S1  | Fe1 | 110.71(16) | C40 | C39 | P2  | 121.7(4) |
| C5  | S1  | Fe2 | 115.37(15) | C40 | C39 | C44 | 118.4(5) |
| Fe2 | S2  | Fe1 | 70.86(4)   | C44 | C39 | P2  | 119.8(4) |
| C11 | S2  | Fe1 | 114.96(16) | C41 | C40 | C39 | 120.9(6) |
| C11 | S2  | Fe2 | 114.41(16) | C40 | C41 | C42 | 119.6(6) |
| C17 | P1  | Fe1 | 117.14(16) | C43 | C42 | C41 | 119.9(6) |
| C17 | P1  | C27 | 101.3(2)   | C42 | C43 | C44 | 120.9(6) |
| C17 | P1  | C33 | 104.0(2)   | C43 | C44 | C39 | 120.2(6) |
| C27 | P1  | Fe1 | 108.90(16) | C46 | C45 | P2  | 121.2(4) |
| C33 | P1  | Fe1 | 122.51(18) | C46 | C45 | C50 | 118.5(5) |
| C33 | P1  | C27 | 99.8(2)    | C50 | C45 | P2  | 120.3(4) |
| C22 | P2  | Fe2 | 123.54(17) | C45 | C46 | C47 | 120.8(5) |
| C22 | P2  | C39 | 102.8(2)   | C48 | C47 | C46 | 119.9(5) |
| C22 | P2  | C45 | 98.9(2)    | C47 | C48 | C49 | 119.7(5) |
| C39 | P2  | Fe2 | 112.21(16) | C50 | C49 | C48 | 120.5(5) |
| C39 | P2  | C45 | 102.6(2)   | C49 | C50 | C45 | 120.6(5) |
| C45 | P2  | Fe2 | 114.11(17) |     |     |     |          |



**Hydrogen Atom Coordinates ( $\text{\AA}\times 10^4$ ) and Isotropic Displacement Parameters ( $\text{\AA}^2\times 10^3$ ) for xstr0193.**

| Atom | x        | y        | z        | U(eq) |
|------|----------|----------|----------|-------|
| H1A  | 2696.17  | 9157.11  | 1043.87  | 43    |
| H1B  | 1890.81  | 9250.5   | 1722.88  | 43    |
| H2A  | 131.09   | 2797.41  | -1478.8  | 60    |
| H2B  | -890.27  | 2579     | -936.78  | 60    |
| H6   | 3654.7   | 5645.59  | 1078.24  | 27    |
| H7   | 3650.19  | 7478.86  | 759.41   | 32    |
| H9   | 1362.28  | 7788.09  | 2701.95  | 34    |
| H10  | 1384.25  | 5937.83  | 3026.2   | 29    |
| H12  | 2500.41  | 3282.69  | -168.81  | 32    |
| H13  | 1712.06  | 2937.48  | -1091.85 | 39    |
| H15  | -1384.79 | 3618.66  | 168.68   | 36    |
| H16  | -598.31  | 4045.58  | 1060.97  | 31    |
| H18  | 1169.28  | 479.53   | 4847.14  | 29    |
| H19  | 2230.21  | -1204    | 4474.21  | 33    |
| H20  | 2665.63  | -1024.56 | 3060.43  | 30    |
| H21  | 1902.48  | 797.41   | 2558.87  | 27    |
| H23  | 5101.2   | 18.64    | 2959.11  | 30    |
| H24  | 4620.18  | -219.74  | 4362.8   | 32    |
| H25  | 3529.34  | 1451.11  | 4764.36  | 35    |
| H26  | 3377.24  | 2764.44  | 3608.38  | 27    |
| H28  | -715.72  | 712.09   | 3587.25  | 37    |
| H29  | -2631.4  | 471.2    | 3899.35  | 48    |
| H30  | -3931.1  | 1852.38  | 4317.97  | 56    |
| H31  | -3295.73 | 3404.75  | 4495.85  | 48    |
| H32  | -1378.65 | 3621.77  | 4207.94  | 40    |
| H34  | -111.6   | 1863.18  | 5187.58  | 37    |
| H35  | 117.56   | 2478.69  | 6228.44  | 53    |
| H36  | 1126.19  | 3962.81  | 6072.77  | 56    |
| H37  | 1874.94  | 4873.72  | 4882.97  | 49    |
| H38  | 1730.87  | 4227.14  | 3838.4   | 36    |
| H40  | 6630.8   | 2120.36  | 888.96   | 41    |
| H41  | 7595.7   | 837.49   | 182.56   | 58    |
| H42  | 6821.44  | -802.3   | 318.71   | 59    |
| H43  | 5103.86  | -1133.99 | 1145.96  | 49    |
| H44  | 4120.88  | 144.12   | 1846.7   | 40    |
| H46  | 5014.68  | 4493.73  | 1396.36  | 38    |
| H47  | 6407.79  | 5584.96  | 1396.39  | 44    |
| H48  | 7797.95  | 4915.18  | 2016.21  | 43    |
| H49  | 7831.25  | 3141.22  | 2601.97  | 45    |
| H50  | 6466.68  | 2045.4   | 2587.91  | 36    |

## Computational Details

### B3LYP geometries and energies for all optimized structures

#### Species A

HF energy= -2967.84983714  
No Imaginary frequency  
Zero-point correction= 0.430050 (Hartree/Particle)  
Thermal correction to Energy= 0.467039  
Thermal correction to Enthalpy= 0.467983  
Thermal correction to Gibbs Free Energy= 0.364165  
Sum of electronic and zero-point Energies= -2967.419787  
Sum of electronic and thermal Energies= -2967.382798  
Sum of electronic and thermal Enthalpies= -2967.381854  
Sum of electronic and thermal Free Energies= -2967.485672

#### Coordinates: A

|    |             |             |            |
|----|-------------|-------------|------------|
| Fe | 0.15120000  | 0.28550000  | 5.06710000 |
| Fe | 0.49980000  | 2.86960000  | 5.03230000 |
| Fe | 4.05930000  | 0.88780000  | 2.48230000 |
| P  | 1.81460000  | -1.15040000 | 4.37060000 |
| P  | 2.42280000  | 3.61180000  | 4.02130000 |
| S  | -1.40970000 | 1.83180000  | 5.79200000 |
| S  | 1.62580000  | 1.43110000  | 6.42940000 |
| O  | -1.30510000 | -1.94680000 | 6.26720000 |
| O  | -1.02910000 | 0.27040000  | 2.38330000 |
| O  | 0.24120000  | 5.25780000  | 6.69660000 |
| O  | -1.02370000 | 3.69810000  | 2.65480000 |
| C  | -0.67950000 | -1.07670000 | 5.82470000 |
| C  | -0.56580000 | 0.31750000  | 3.44560000 |
| C  | 0.36920000  | 4.32400000  | 6.02400000 |
| C  | -0.42310000 | 3.35330000  | 3.57910000 |
| C  | -1.49680000 | 1.90120000  | 7.64160000 |
| C  | -0.42060000 | 1.14560000  | 8.42010000 |
| C  | 1.00980000  | 1.61680000  | 8.17000000 |
| C  | 2.39150000  | 1.85520000  | 1.71670000 |
| C  | 3.12930000  | 2.73030000  | 2.58670000 |
| C  | 4.44930000  | 2.86580000  | 2.02500000 |
| C  | 4.51570000  | 2.08000000  | 0.83650000 |
| C  | 3.24380000  | 1.45730000  | 0.64650000 |
| C  | 5.62420000  | 0.17620000  | 3.65940000 |
| C  | 4.40550000  | 0.16880000  | 4.39930000 |
| C  | 3.45940000  | -0.67200000 | 3.71640000 |
| C  | 4.12240000  | -1.17930000 | 2.54290000 |
| C  | 5.44950000  | -0.65430000 | 2.51020000 |
| C  | 1.23200000  | -2.36180000 | 3.09760000 |
| H  | 1.96150000  | -3.16430000 | 2.93550000 |
| H  | 0.29080000  | -2.80500000 | 3.44280000 |
| H  | 1.03390000  | -1.85430000 | 2.14690000 |
| C  | 2.35830000  | -2.28530000 | 5.73470000 |
| H  | 1.49800000  | -2.84650000 | 6.11720000 |
| H  | 3.12310000  | -2.98740000 | 5.38030000 |
| H  | 2.77170000  | -1.68650000 | 6.55380000 |
| C  | 2.21960000  | 5.31030000  | 3.29610000 |
| H  | 3.16490000  | 5.66950000  | 2.87080000 |
| H  | 1.46390000  | 5.29090000  | 2.50310000 |
| H  | 1.88660000  | 6.00840000  | 4.07340000 |
| C  | 3.86550000  | 3.90210000  | 5.14110000 |
| H  | 4.72320000  | 4.31790000  | 4.59890000 |
| H  | 3.55940000  | 4.61740000  | 5.91400000 |

|   |             |             |             |
|---|-------------|-------------|-------------|
| H | 4.15770000  | 2.97320000  | 5.63690000  |
| H | -2.48600000 | 1.50000000  | 7.89600000  |
| H | -1.49750000 | 2.96570000  | 7.91050000  |
| H | -0.63820000 | 1.26260000  | 9.49490000  |
| H | -0.49280000 | 0.07280000  | 8.20400000  |
| H | 1.70340000  | 1.03940000  | 8.79430000  |
| H | 1.12850000  | 2.67460000  | 8.43740000  |
| H | 1.36980000  | 1.53520000  | 1.87280000  |
| H | 2.98170000  | 0.77190000  | -0.15160000 |
| H | 5.39120000  | 1.94970000  | 0.20990000  |
| H | 5.26660000  | 3.44140000  | 2.44390000  |
| H | 3.68380000  | -1.82530000 | 1.79190000  |
| H | 6.18140000  | -0.82740000 | 1.72910000  |
| H | 6.51480000  | 0.74320000  | 3.90680000  |
| H | 4.20480000  | 0.70890000  | 5.31610000  |

---

### Species A\_alt1

HF energy= -2967.84134425

No imaginary frequency

Zero-point correction= 0.430745 (Hartree/Particle)

Thermal correction to Energy= 0.467441

Thermal correction to Enthalpy= 0.468385

Thermal correction to Gibbs Free Energy= 0.364861

Sum of electronic and zero-point Energies= -2967.410599

Sum of electronic and thermal Energies= -2967.373904

Sum of electronic and thermal Enthalpies= -2967.372959

Sum of electronic and thermal Free Energies= -2967.476483

### Coordinates: A\_alt1

|    |             |             |            |
|----|-------------|-------------|------------|
| Fe | -0.28298300 | 1.10074100  | 5.30968600 |
| Fe | 0.28696300  | 3.62446100  | 5.24795900 |
| Fe | 3.79705000  | 5.82592000  | 6.70472700 |
| P  | 2.36643400  | 3.80055200  | 4.21352900 |
| S  | -1.79422100 | 2.78666300  | 5.88528200 |
| S  | 1.13662900  | 2.18201000  | 6.83815100 |
| O  | -1.96736300 | -1.08584600 | 6.31850000 |
| O  | 1.94205000  | -0.71258200 | 4.69768900 |
| O  | -1.02578700 | 4.58201800  | 2.81374600 |
| O  | -1.13355300 | 1.21836200  | 2.50297900 |
| C  | -1.28096300 | -0.22397900 | 5.97377300 |
| C  | 1.08067100  | 0.02337300  | 4.91435000 |
| C  | -0.49802300 | 4.20062300  | 3.77101100 |
| C  | -0.79885200 | 1.22256600  | 3.60965300 |
| C  | -2.13176700 | 2.66490000  | 7.70420800 |
| C  | -1.14365500 | 1.87435500  | 8.56232000 |
| C  | 0.30602900  | 2.34539400  | 8.49185500 |
| C  | 4.41080200  | 3.89988700  | 6.28223600 |
| C  | 3.80400900  | 4.49515700  | 5.12175100 |
| C  | 4.57887300  | 5.66375400  | 4.79400700 |
| C  | 5.64062200  | 5.78244300  | 5.74131900 |
| C  | 5.53849700  | 4.69068100  | 6.65661300 |
| C  | 2.58094300  | 7.49925000  | 6.81425100 |
| C  | 1.82492300  | 6.30426000  | 7.08974200 |
| C  | 2.43102700  | 5.68423400  | 8.23842000 |
| C  | 3.53375900  | 6.48709000  | 8.65887000 |
| C  | 3.63011500  | 7.60505300  | 7.77622400 |
| C  | 3.14171100  | 2.24687200  | 3.56599100 |
| H  | 4.08300200  | 2.48208900  | 3.05346600 |

|   |             |            |            |
|---|-------------|------------|------------|
| H | 3.35197600  | 1.55833600 | 4.38903400 |
| H | 2.45775500  | 1.75422000 | 2.86657800 |
| C | 2.38414000  | 4.81937900 | 2.66282200 |
| H | 3.38632300  | 4.84468900 | 2.21888000 |
| H | 1.69052600  | 4.37487700 | 1.94036400 |
| H | 2.05234800  | 5.84539600 | 2.85517500 |
| H | -3.12517200 | 2.20408100 | 7.77503500 |
| H | -2.23053300 | 3.69101800 | 8.07675700 |
| H | -1.47853600 | 1.94594000 | 9.61098100 |
| H | -1.18748900 | 0.81225400 | 8.29806400 |
| H | 0.91637500  | 1.75636100 | 9.18767900 |
| H | 0.38439900  | 3.39611400 | 8.79756400 |
| H | 4.04168200  | 3.02233500 | 6.80008100 |
| H | 6.18210600  | 4.51212800 | 7.51077200 |
| H | 6.37442000  | 6.57993400 | 5.77594600 |
| H | 4.38079300  | 6.35433000 | 3.98282200 |
| H | 4.20485400  | 6.26236000 | 9.48027500 |
| H | 4.38508300  | 8.38261600 | 7.80918400 |
| H | 2.40605900  | 8.19076800 | 5.99896500 |
| P | 0.33282300  | 5.69464600 | 6.21067200 |
| H | 2.13041200  | 4.74508600 | 8.68592800 |
| C | 0.00941700  | 7.09309500 | 5.03347700 |
| H | -0.01562400 | 8.05853600 | 5.55301800 |
| H | 0.77141300  | 7.12985000 | 4.24744900 |
| H | -0.96000200 | 6.92674000 | 4.55060900 |
| C | -0.96782400 | 6.08227600 | 7.47991100 |
| H | -1.95970800 | 5.87661500 | 7.06076700 |
| H | -0.82935200 | 5.46165700 | 8.37085800 |
| H | -0.90790700 | 7.13686700 | 7.77662300 |

---

### Species A\_alt2

HF energy= -2967.84637819

No Imaginary frequency

Zero-point correction= 0.430714 (Hartree/Particle)

Thermal correction to Energy= 0.467550

Thermal correction to Enthalpy= 0.468495

Thermal correction to Gibbs Free Energy= 0.364049

Sum of electronic and zero-point Energies= -2967.415664

Sum of electronic and thermal Energies= -2967.378828

Sum of electronic and thermal Enthalpies= -2967.377884

Sum of electronic and thermal Free Energies= -2967.482329

### Coordinates: A\_alt2

|    |             |             |            |
|----|-------------|-------------|------------|
| Fe | -0.39170000 | 0.77330000  | 5.58710000 |
| Fe | 0.35910000  | 3.20660000  | 4.87240000 |
| Fe | 1.85860000  | 5.95460000  | 1.87220000 |
| P  | 2.53940000  | 3.22830000  | 3.99900000 |
| S  | -1.71880000 | 2.68140000  | 5.68290000 |
| S  | 1.13070000  | 2.11020000  | 6.72640000 |
| O  | -1.50170000 | -1.08960000 | 7.58030000 |
| O  | 1.89120000  | -0.85820000 | 4.73440000 |
| O  | 0.42110000  | 5.89220000  | 5.96610000 |
| O  | -2.02010000 | -0.06460000 | 3.29760000 |
| C  | -1.07290000 | -0.31550000 | 6.84020000 |
| C  | 0.99320000  | -0.20330000 | 5.05520000 |
| C  | 0.42310000  | 4.84440000  | 5.46150000 |
| C  | -1.36670000 | 0.27320000  | 4.19110000 |
| C  | -1.95550000 | 3.26990000  | 7.42460000 |

|   |             |            |             |
|---|-------------|------------|-------------|
| C | -1.08840000 | 2.61360000 | 8.49570000  |
| C | 0.41470000  | 2.78650000 | 8.29800000  |
| C | 3.08860000  | 6.05060000 | 3.52630000  |
| C | 3.04040000  | 4.70360000 | 3.02090000  |
| C | 3.53050000  | 4.74780000 | 1.66800000  |
| C | 3.86840000  | 6.09850000 | 1.35080000  |
| C | 3.60020000  | 6.90170000 | 2.50050000  |
| C | 0.40010000  | 5.31920000 | 0.54910000  |
| C | -0.04790000 | 5.17590000 | 1.91090000  |
| C | -0.03430000 | 6.49120000 | 2.49490000  |
| C | 0.42030000  | 7.41880000 | 1.51030000  |
| C | 0.69300000  | 6.69520000 | 0.31020000  |
| C | 3.90210000  | 3.23550000 | 5.25840000  |
| H | 4.87180000  | 3.35780000 | 4.76060000  |
| H | 3.75190000  | 4.06010000 | 5.96370000  |
| H | 3.89020000  | 2.30020000 | 5.82630000  |
| C | 3.12910000  | 1.84780000 | 2.91040000  |
| H | 4.17280000  | 2.00480000 | 2.61080000  |
| H | 3.05670000  | 0.90710000 | 3.46440000  |
| H | 2.51010000  | 1.75360000 | 2.01340000  |
| H | -3.01560000 | 3.09430000 | 7.64640000  |
| H | -1.79940000 | 4.35650000 | 7.40620000  |
| H | -1.35780000 | 3.05270000 | 9.47070000  |
| H | -1.32920000 | 1.54690000 | 8.56200000  |
| H | 0.95690000  | 2.27750000 | 9.10470000  |
| H | 0.69540000  | 3.84740000 | 8.33130000  |
| H | 2.76380000  | 6.37250000 | 4.50880000  |
| H | 3.72610000  | 7.97620000 | 2.57280000  |
| H | 4.23450000  | 6.45310000 | 0.39380000  |
| H | 3.60920000  | 3.90560000 | 0.99090000  |
| H | 0.56910000  | 8.48190000 | 1.66290000  |
| H | 1.08500000  | 7.11000000 | -0.61170000 |
| H | 0.52900000  | 4.51810000 | -0.16840000 |
| P | -0.58070000 | 3.63980000 | 2.76180000  |
| H | -0.29050000 | 6.73610000 | 3.51820000  |
| C | -0.36950000 | 2.39690000 | 1.39870000  |
| H | -0.94750000 | 2.69060000 | 0.51370000  |
| H | 0.68230000  | 2.30010000 | 1.11330000  |
| H | -0.72610000 | 1.42150000 | 1.74060000  |
| C | -2.42230000 | 3.86240000 | 2.69690000  |
| H | -2.92590000 | 2.93400000 | 2.98490000  |
| H | -2.73000000 | 4.64400000 | 3.39910000  |
| H | -2.72500000 | 4.14590000 | 1.68140000  |

---

### Species B

HF energy= -2967.64235172

No imaginary frequency

Zero-point correction= 0.430492 (Hartree/Particle)

Thermal correction to Energy= 0.467908

Thermal correction to Enthalpy= 0.468852

Thermal correction to Gibbs Free Energy= 0.363181

Sum of electronic and zero-point Energies= -2967.211859

Sum of electronic and thermal Energies= -2967.174444

Sum of electronic and thermal Enthalpies= -2967.173499

Sum of electronic and thermal Free Energies= -2967.279171

### Coordinates: B

Fe 0.17230000 0.25900000 5.14920000

|    |            |            |            |
|----|------------|------------|------------|
| Fe | 0.4010000  | 2.8911000  | 5.0331000  |
| Fe | 4.0707000  | 0.8259000  | 2.6009000  |
| P  | 1.7636000  | -1.2640000 | 4.4324000  |
| P  | 2.2820000  | 3.6937000  | 3.8500000  |
| S  | -1.3736000 | 1.7952000  | 6.0175000  |
| S  | 1.7680000  | 1.5485000  | 6.3092000  |
| O  | -1.9184000 | -1.8375000 | 5.3668000  |
| O  | -0.5485000 | 0.7918000  | 2.3369000  |
| O  | 0.4018000  | 5.1625000  | 6.8634000  |
| O  | -1.4699000 | 4.1119000  | 3.0833000  |
| C  | -1.1020000 | -1.0409000 | 5.2689000  |
| C  | -0.2269000 | 0.7308000  | 3.4449000  |
| C  | 0.4081000  | 4.2932000  | 6.1159000  |
| C  | -0.7429000 | 3.6346000  | 3.8228000  |
| C  | -1.2665000 | 1.7862000  | 7.8653000  |
| C  | -0.0850000 | 1.0269000  | 8.4617000  |
| C  | 1.2867000  | 1.5911000  | 8.1046000  |
| C  | 2.5589000  | 1.8639000  | 1.5986000  |
| C  | 3.1628000  | 2.6999000  | 2.6045000  |
| C  | 4.5625000  | 2.8091000  | 2.2701000  |
| C  | 4.8008000  | 2.0554000  | 1.0857000  |
| C  | 3.5656000  | 1.4734000  | 0.6727000  |
| C  | 5.5907000  | 0.0062000  | 3.7783000  |
| C  | 4.3705000  | 0.0406000  | 4.5093000  |
| C  | 3.3926000  | -0.7464000 | 3.7998000  |
| C  | 4.0416000  | -1.2500000 | 2.6147000  |
| C  | 5.3883000  | -0.7867000 | 2.6092000  |
| C  | 1.1392000  | -2.4063000 | 3.1246000  |
| H  | 1.8660000  | -3.1989000 | 2.9134000  |
| H  | 0.2083000  | -2.8740000 | 3.4643000  |
| H  | 0.9268000  | -1.8571000 | 2.2007000  |
| C  | 2.2219000  | -2.4195000 | 5.8025000  |
| H  | 1.3250000  | -2.9187000 | 6.1892000  |
| H  | 2.9280000  | -3.1780000 | 5.4437000  |
| H  | 2.6910000  | -1.8590000 | 6.6185000  |
| C  | 1.9020000  | 5.2365000  | 2.8992000  |
| H  | 2.8219000  | 5.6549000  | 2.4743000  |
| H  | 1.2096000  | 5.0175000  | 2.0790000  |
| H  | 1.4406000  | 5.9835000  | 3.5567000  |
| C  | 3.6122000  | 4.2697000  | 4.9920000  |
| H  | 4.4115000  | 4.7728000  | 4.4365000  |
| H  | 3.1910000  | 4.9855000  | 5.7071000  |
| H  | 4.0262000  | 3.4252000  | 5.5504000  |
| H  | -2.2107000 | 1.3364000  | 8.1937000  |
| H  | -1.2748000 | 2.8335000  | 8.1926000  |
| H  | -0.1843000 | 1.0569000  | 9.5581000  |
| H  | -0.1391000 | -0.0325000 | 8.1743000  |
| H  | 2.0716000  | 1.0151000  | 8.6080000  |
| H  | 1.3859000  | 2.6321000  | 8.4357000  |
| H  | 1.5171000  | 1.5823000  | 1.5400000  |
| H  | 3.4217000  | 0.8189000  | -0.1793000 |
| H  | 5.7642000  | 1.9154000  | 0.6086000  |
| H  | 5.3163000  | 3.3487000  | 2.8305000  |
| H  | 3.5859000  | -1.8606000 | 1.8448000  |
| H  | 6.1177000  | -0.9738000 | 1.8295000  |
| H  | 6.5040000  | 0.5257000  | 4.0452000  |
| H  | 4.2006000  | 0.5706000  | 5.4369000  |

---

**Species <sup>3</sup>C**

HF energy= -2967.31069919  
No Imaginary frequency  
Zero-point correction= 0.430101 (Hartree/Particle)  
Thermal correction to Energy= 0.468001  
Thermal correction to Enthalpy= 0.468945  
Thermal correction to Gibbs Free Energy= 0.361385  
Sum of electronic and zero-point Energies= -2966.880599  
Sum of electronic and thermal Energies= -2966.842699  
Sum of electronic and thermal Enthalpies= -2966.841754  
Sum of electronic and thermal Free Energies= -2966.949315

Coordinates: <sup>3</sup>C

|    |             |             |            |
|----|-------------|-------------|------------|
| Fe | 0.16320000  | 0.26850000  | 5.17380000 |
| Fe | 0.32970000  | 2.85750000  | 5.05590000 |
| Fe | 4.13180000  | 0.77240000  | 2.70910000 |
| P  | 1.63680000  | -1.35620000 | 4.43850000 |
| P  | 2.09190000  | 3.76240000  | 3.76240000 |
| S  | -1.31270000 | 1.73290000  | 6.23910000 |
| S  | 1.85270000  | 1.53060000  | 6.20810000 |
| O  | -2.20370000 | -1.46900000 | 4.74370000 |
| O  | -0.08410000 | 1.07580000  | 2.36530000 |
| O  | 0.40380000  | 5.06020000  | 6.99170000 |
| O  | -1.80060000 | 4.11150000  | 3.40160000 |
| C  | -1.28440000 | -0.81070000 | 4.89380000 |
| C  | 0.04130000  | 1.04070000  | 3.52090000 |
| C  | 0.38760000  | 4.22640000  | 6.21130000 |
| C  | -0.97750000 | 3.63050000  | 4.02290000 |
| C  | -1.00280000 | 1.75040000  | 8.06560000 |
| C  | 0.24620000  | 1.01490000  | 8.54090000 |
| C  | 1.56620000  | 1.59880000  | 8.04590000 |
| C  | 2.79800000  | 2.01770000  | 1.50670000 |
| C  | 3.20530000  | 2.75620000  | 2.66710000 |
| C  | 4.64440000  | 2.80870000  | 2.63530000 |
| C  | 5.09970000  | 2.13900000  | 1.45580000 |
| C  | 3.95200000  | 1.64810000  | 0.76340000 |
| C  | 5.57530000  | -0.31910000 | 3.87580000 |
| C  | 4.35710000  | -0.26870000 | 4.60430000 |
| C  | 3.32340000  | -0.89790000 | 3.83030000 |
| C  | 3.93320000  | -1.31450000 | 2.59300000 |
| C  | 5.31910000  | -0.96370000 | 2.62930000 |
| C  | 1.00170000  | -2.42940000 | 3.08120000 |
| H  | 1.71320000  | -3.22340000 | 2.82680000 |
| H  | 0.07310000  | -2.90470000 | 3.41790000 |
| H  | 0.76950000  | -1.84010000 | 2.18660000 |
| C  | 2.06880000  | -2.56090000 | 5.77260000 |
| H  | 1.14630000  | -3.02740000 | 6.13970000 |
| H  | 2.73460000  | -3.34650000 | 5.39590000 |
| H  | 2.55290000  | -2.04680000 | 6.60990000 |
| C  | 1.55440000  | 5.03610000  | 2.53330000 |
| H  | 2.41660000  | 5.49350000  | 2.03490000 |
| H  | 0.89620000  | 4.59360000  | 1.77710000 |
| H  | 0.99570000  | 5.82070000  | 3.05860000 |
| C  | 3.30710000  | 4.68540000  | 4.79870000 |
| H  | 4.06420000  | 5.18470000  | 4.18330000 |
| H  | 2.77140000  | 5.45910000  | 5.36020000 |
| H  | 3.79010000  | 4.01650000  | 5.51910000 |
| H  | -1.90120000 | 1.28770000  | 8.48940000 |
| H  | -1.00010000 | 2.80040000  | 8.38240000 |
| H  | 0.25850000  | 1.05410000  | 9.64080000 |

|   |            |             |             |
|---|------------|-------------|-------------|
| H | 0.17910000 | -0.04830000 | 8.27000000  |
| H | 2.40810000 | 1.04330000  | 8.47390000  |
| H | 1.67990000 | 2.64570000  | 8.35090000  |
| H | 1.77900000 | 1.76560000  | 1.23990000  |
| H | 3.95520000 | 1.07000000  | -0.15470000 |
| H | 6.13370000 | 2.01730000  | 1.15090000  |
| H | 5.28390000 | 3.29020000  | 3.36560000  |
| H | 3.43960000 | -1.82530000 | 1.77430000  |
| H | 6.04180000 | -1.14150000 | 1.84000000  |
| H | 6.52450000 | 0.09710000  | 4.19700000  |
| H | 4.22140000 | 0.19820000  | 5.57220000  |

---

### Species <sup>1</sup>C

HF energy= -2967.28336712

No imaginary frequency

Zero-point correction= 0.429825 (Hartree/Particle)

Thermal correction to Energy= 0.467878

Thermal correction to Enthalpy= 0.468822

Thermal correction to Gibbs Free Energy= 0.361563

Sum of electronic and zero-point Energies= -2966.853542

Sum of electronic and thermal Energies= -2966.815489

Sum of electronic and thermal Enthalpies= -2966.814545

Sum of electronic and thermal Free Energies= -2966.921804

### Coordinates: <sup>1</sup>C

|    |             |             |            |
|----|-------------|-------------|------------|
| Fe | 0.12140000  | 0.15700000  | 5.16790000 |
| Fe | 0.42630000  | 3.05260000  | 4.99810000 |
| Fe | 3.95150000  | 0.85750000  | 2.61410000 |
| P  | 1.78290000  | -1.37900000 | 4.58160000 |
| P  | 2.34040000  | 3.89230000  | 3.88020000 |
| S  | -1.37140000 | 1.85350000  | 5.85170000 |
| S  | 1.77470000  | 1.58290000  | 6.09110000 |
| O  | -2.12030000 | -1.80230000 | 5.11950000 |
| O  | -0.38750000 | 0.62140000  | 2.32770000 |
| O  | 0.37170000  | 5.25840000  | 6.90760000 |
| O  | -1.40850000 | 4.37320000  | 3.04770000 |
| C  | -1.25980000 | -1.06270000 | 5.10270000 |
| C  | -0.14880000 | 0.48050000  | 3.43550000 |
| C  | 0.38740000  | 4.42030000  | 6.13460000 |
| C  | -0.70460000 | 3.87750000  | 3.78850000 |
| C  | -1.27140000 | 1.66440000  | 7.69780000 |
| C  | -0.08640000 | 0.84030000  | 8.19520000 |
| C  | 1.29380000  | 1.42030000  | 7.89380000 |
| C  | 2.52420000  | 2.05430000  | 1.63280000 |
| C  | 3.16830000  | 2.80760000  | 2.68210000 |
| C  | 4.57810000  | 2.82450000  | 2.37540000 |
| C  | 4.77990000  | 2.10790000  | 1.16330000 |
| C  | 3.51510000  | 1.63290000  | 0.70690000 |
| C  | 5.51680000  | -0.11630000 | 3.60970000 |
| C  | 4.37240000  | -0.06160000 | 4.44840000 |
| C  | 3.29650000  | -0.77000000 | 3.79170000 |
| C  | 3.80880000  | -1.22410000 | 2.52010000 |
| C  | 5.17020000  | -0.82720000 | 2.42210000 |
| C  | 1.17990000  | -2.72900000 | 3.48570000 |
| H  | 1.98540000  | -3.44830000 | 3.29840000 |
| H  | 0.35200000  | -3.25880000 | 3.97100000 |
| H  | 0.82570000  | -2.33690000 | 2.52550000 |
| C  | 2.35520000  | -2.25800000 | 6.09860000 |



|   |             |             |             |
|---|-------------|-------------|-------------|
| H | 1.51300000  | -2.75970000 | 6.59120000  |
| H | 3.10090000  | -3.01300000 | 5.81940000  |
| H | 2.81760000  | -1.55630000 | 6.80050000  |
| C | 2.00890000  | 5.42800000  | 2.91140000  |
| H | 2.94920000  | 5.81490000  | 2.50150000  |
| H | 1.32860000  | 5.22170000  | 2.07790000  |
| H | 1.56070000  | 6.19620000  | 3.55380000  |
| C | 3.65110000  | 4.41940000  | 5.06110000  |
| H | 4.47180000  | 4.90460000  | 4.52050000  |
| H | 3.23890000  | 5.14720000  | 5.76960000  |
| H | 4.04020000  | 3.56280000  | 5.61940000  |
| H | -2.21720000 | 1.18910000  | 7.98000000  |
| H | -1.27250000 | 2.67390000  | 8.12480000  |
| H | -0.17330000 | 0.74800000  | 9.28870000  |
| H | -0.16010000 | -0.19550000 | 7.81450000  |
| H | 2.07510000  | 0.78440000  | 8.32310000  |
| H | 1.41090000  | 2.41980000  | 8.32770000  |
| H | 1.46380000  | 1.87070000  | 1.52650000  |
| H | 3.34070000  | 1.03120000  | -0.17780000 |
| H | 5.73850000  | 1.92560000  | 0.69120000  |
| H | 5.35870000  | 3.29030000  | 2.96500000  |
| H | 3.26220000  | -1.77830000 | 1.76640000  |
| H | 5.81890000  | -1.00770000 | 1.57270000  |
| H | 6.47820000  | 0.33750000  | 3.82180000  |
| H | 4.32780000  | 0.40840000  | 5.42190000  |

---

### Species D

HF energy= -2968.26442125

No Imaginary frequency

Zero-point correction= 0.440148 (Hartree/Particle)

Thermal correction to Energy= 0.477167

Thermal correction to Enthalpy= 0.478111

Thermal correction to Gibbs Free Energy= 0.374183

Sum of electronic and zero-point Energies= -2967.824273

Sum of electronic and thermal Energies= -2967.787254

Sum of electronic and thermal Enthalpies= -2967.786310

Sum of electronic and thermal Free Energies= -2967.890238

### Coordinates: D

|    |             |             |            |
|----|-------------|-------------|------------|
| Fe | 0.13110000  | 0.25010000  | 5.05920000 |
| Fe | 0.51780000  | 2.86570000  | 4.95890000 |
| Fe | 4.05060000  | 0.94990000  | 2.48580000 |
| P  | 1.83910000  | -1.19890000 | 4.33330000 |
| P  | 2.48980000  | 3.68790000  | 4.03920000 |
| S  | -1.43110000 | 1.85050000  | 5.70630000 |
| S  | 1.59020000  | 1.43190000  | 6.45390000 |
| O  | -0.93670000 | -1.88960000 | 6.76970000 |
| O  | -1.59240000 | -0.40330000 | 2.75480000 |
| O  | 0.33670000  | 5.17230000  | 6.76830000 |
| O  | -1.04510000 | 3.96800000  | 2.70640000 |
| C  | -0.49820000 | -1.05110000 | 6.12410000 |
| C  | -0.92880000 | -0.18300000 | 3.65860000 |
| C  | 0.40800000  | 4.28870000  | 6.04180000 |
| C  | -0.43110000 | 3.56520000  | 3.58200000 |
| C  | -1.56810000 | 2.01890000  | 7.54880000 |
| C  | -0.52520000 | 1.31120000  | 8.41300000 |
| C  | 0.93190000  | 1.69760000  | 8.16620000 |
| C  | 2.42300000  | 1.96880000  | 1.70280000 |

|   |             |             |             |
|---|-------------|-------------|-------------|
| C | 3.16800000  | 2.80760000  | 2.60640000  |
| C | 4.50080000  | 2.92470000  | 2.06860000  |
| C | 4.56540000  | 2.16550000  | 0.86540000  |
| C | 3.28470000  | 1.57690000  | 0.63970000  |
| C | 5.61470000  | 0.18690000  | 3.64360000  |
| C | 4.39800000  | 0.17520000  | 4.38350000  |
| C | 3.44200000  | -0.63570000 | 3.67490000  |
| C | 4.10030000  | -1.11850000 | 2.48580000  |
| C | 5.43100000  | -0.60840000 | 2.47280000  |
| C | 1.25970000  | -2.40200000 | 3.05780000  |
| H | 2.01620000  | -3.17390000 | 2.87580000  |
| H | 0.34530000  | -2.89170000 | 3.41220000  |
| H | 1.03230000  | -1.89450000 | 2.11360000  |
| C | 2.40820000  | -2.31970000 | 5.69300000  |
| H | 1.58110000  | -2.94100000 | 6.05480000  |
| H | 3.21020000  | -2.97160000 | 5.32800000  |
| H | 2.78960000  | -1.72200000 | 6.52800000  |
| C | 2.29960000  | 5.41190000  | 3.38890000  |
| H | 3.25960000  | 5.78250000  | 3.01040000  |
| H | 1.57440000  | 5.43290000  | 2.56790000  |
| H | 1.94960000  | 6.08340000  | 4.18220000  |
| C | 3.88890000  | 3.89750000  | 5.22110000  |
| H | 4.76760000  | 4.31890000  | 4.71960000  |
| H | 3.57950000  | 4.58940000  | 6.01370000  |
| H | 4.15350000  | 2.94290000  | 5.68170000  |
| H | -2.56660000 | 1.63510000  | 7.78730000  |
| H | -1.58250000 | 3.09720000  | 7.74900000  |
| H | -0.75700000 | 1.55020000  | 9.46270000  |
| H | -0.63990000 | 0.22580000  | 8.32460000  |
| H | 1.58420000  | 1.10870000  | 8.82120000  |
| H | 1.10680000  | 2.75430000  | 8.40190000  |
| H | 1.38890000  | 1.67200000  | 1.82280000  |
| H | 3.02140000  | 0.91990000  | -0.18120000 |
| H | 5.44750000  | 2.02960000  | 0.25010000  |
| H | 5.32460000  | 3.47300000  | 2.51020000  |
| H | 3.66010000  | -1.74310000 | 1.71800000  |
| H | 6.16260000  | -0.77020000 | 1.68950000  |
| H | 6.51310000  | 0.73280000  | 3.90790000  |
| H | 4.21700000  | 0.68160000  | 5.32320000  |
| H | 0.67930000  | 1.47590000  | 4.03580000  |

---

### Species E

HF energy= -2968.43031196

No Imaginary frequency

Zero-point correction= 0.436086 (Hartree/Particle)

Thermal correction to Energy= 0.474011

Thermal correction to Enthalpy= 0.474955

Thermal correction to Gibbs Free Energy= 0.367736

Sum of electronic and zero-point Energies= -2967.994226

Sum of electronic and thermal Energies= -2967.956301

Sum of electronic and thermal Enthalpies= -2967.955357

Sum of electronic and thermal Free Energies= -2968.062576

### Coordinates: E

|    |            |             |            |
|----|------------|-------------|------------|
| Fe | 0.13107700 | 0.25013500  | 5.05920600 |
| Fe | 0.51775900 | 2.86569200  | 4.95890400 |
| Fe | 4.05064500 | 0.94991300  | 2.48582100 |
| P  | 1.83914700 | -1.19893600 | 4.33329900 |

|   |             |             |             |
|---|-------------|-------------|-------------|
| P | 2.48978000  | 3.68791900  | 4.03920000  |
| S | -1.43110500 | 1.85052800  | 5.70627100  |
| S | 1.59017900  | 1.43189700  | 6.45392800  |
| O | -0.93668400 | -1.88957600 | 6.76973900  |
| O | -1.59244600 | -0.40328100 | 2.75482900  |
| O | 0.33667000  | 5.17234700  | 6.76834700  |
| O | -1.04512700 | 3.96804800  | 2.70637600  |
| C | -0.49818900 | -1.05105600 | 6.12405300  |
| C | -0.92883000 | -0.18302600 | 3.65864900  |
| C | 0.40804300  | 4.28871600  | 6.04176800  |
| C | -0.43107700 | 3.56524900  | 3.58197800  |
| C | -1.56807700 | 2.01891400  | 7.54876200  |
| C | -0.52519800 | 1.31119800  | 8.41296500  |
| C | 0.93192100  | 1.69758100  | 8.16618000  |
| C | 2.42301100  | 1.96884000  | 1.70277700  |
| C | 3.16801900  | 2.80761900  | 2.60643600  |
| C | 4.50079700  | 2.92468400  | 2.06862400  |
| C | 4.56537800  | 2.16551100  | 0.86542300  |
| C | 3.28471800  | 1.57687800  | 0.63970400  |
| C | 5.61465000  | 0.18694500  | 3.64360700  |
| C | 4.39799100  | 0.17517900  | 4.38350100  |
| C | 3.44202600  | -0.63568800 | 3.67490000  |
| C | 4.10033100  | -1.11853400 | 2.48575600  |
| C | 5.43096800  | -0.60835400 | 2.47276100  |
| C | 1.25974600  | -2.40204200 | 3.05776400  |
| H | 2.01615600  | -3.17390700 | 2.87580500  |
| H | 0.34528400  | -2.89165500 | 3.41220000  |
| H | 1.03232800  | -1.89448100 | 2.11362700  |
| C | 2.40821200  | -2.31970300 | 5.69297400  |
| H | 1.58108900  | -2.94098900 | 6.05484900  |
| H | 3.21017700  | -2.97163500 | 5.32796400  |
| H | 2.78955800  | -1.72195700 | 6.52800200  |
| C | 2.29955400  | 5.41192500  | 3.38887100  |
| H | 3.25956800  | 5.78246100  | 3.01040100  |
| H | 1.57442800  | 5.43286100  | 2.56790300  |
| H | 1.94959300  | 6.08337100  | 4.18221400  |
| C | 3.88893200  | 3.89749500  | 5.22113000  |
| H | 4.76760000  | 4.31894800  | 4.71961000  |
| H | 3.57950300  | 4.58938100  | 6.01367200  |
| H | 4.15347300  | 2.94286000  | 5.68172900  |
| H | -2.56664000 | 1.63509600  | 7.78727800  |
| H | -1.58253500 | 3.09717500  | 7.74904900  |
| H | -0.75703400 | 1.55023300  | 9.46268600  |
| H | -0.63986000 | 0.22584600  | 8.32461000  |
| H | 1.58419800  | 1.10865200  | 8.82115800  |
| H | 1.10679500  | 2.75429700  | 8.40189800  |
| H | 1.38893500  | 1.67202600  | 1.82278200  |
| H | 3.02144800  | 0.91992300  | -0.18124600 |
| H | 5.44746300  | 2.02963100  | 0.25011000  |
| H | 5.32464500  | 3.47302400  | 2.51016700  |
| H | 3.66005700  | -1.74307700 | 1.71803300  |
| H | 6.16263800  | -0.77016000 | 1.68951400  |
| H | 6.51313900  | 0.73278800  | 3.90794600  |
| H | 4.21699800  | 0.68156300  | 5.32319300  |
| H | 0.67927400  | 1.47590900  | 4.03584200  |

---

**Species F**

HF energy= -2968.45275120

No Imaginary frequency  
 Zero-point correction= 0.435001 (Hartree/Particle)  
 Thermal correction to Energy= 0.472740  
 Thermal correction to Enthalpy= 0.473684  
 Thermal correction to Gibbs Free Energy= 0.367536  
 Sum of electronic and zero-point Energies= -2968.017750  
 Sum of electronic and thermal Energies= -2967.980011  
 Sum of electronic and thermal Enthalpies= -2967.979067  
 Sum of electronic and thermal Free Energies= -2968.085215

Coordinates: **F**

|    |             |             |            |
|----|-------------|-------------|------------|
| Fe | 0.05190000  | -0.04080000 | 4.97090000 |
| Fe | 0.48140000  | 3.26980000  | 5.03520000 |
| Fe | 3.94500000  | 0.90410000  | 2.59170000 |
| P  | 1.75270000  | -1.37500000 | 4.46530000 |
| P  | 2.41320000  | 3.87190000  | 4.06420000 |
| S  | -1.33650000 | 1.84140000  | 5.52700000 |
| S  | 1.64570000  | 1.49740000  | 6.14720000 |
| O  | -1.40560000 | -2.21580000 | 6.26310000 |
| O  | -0.86920000 | -0.08740000 | 2.19980000 |
| O  | 0.56310000  | 5.23170000  | 7.25020000 |
| O  | -1.27780000 | 4.80920000  | 3.28880000 |
| C  | -0.77640000 | -1.29190000 | 5.87640000 |
| C  | -0.44670000 | 0.01490000  | 3.29970000 |
| C  | 0.52610000  | 4.41490000  | 6.42510000 |
| C  | -0.56970000 | 4.22610000  | 3.99630000 |
| C  | -1.47720000 | 1.88170000  | 7.37630000 |
| C  | -0.37310000 | 1.16370000  | 8.16300000 |
| C  | 1.06970000  | 1.61340000  | 7.90740000 |
| C  | 2.27010000  | 1.93880000  | 1.88470000 |
| C  | 3.06080000  | 2.81010000  | 2.70980000 |
| C  | 4.37010000  | 2.87580000  | 2.10990000 |
| C  | 4.37310000  | 2.06890000  | 0.93200000 |
| C  | 3.07280000  | 1.48880000  | 0.79670000 |
| C  | 5.51350000  | 0.17110000  | 3.73150000 |
| C  | 4.30200000  | 0.09070000  | 4.48210000 |
| C  | 3.37310000  | -0.75570000 | 3.78310000 |
| C  | 4.03290000  | -1.17330000 | 2.57660000 |
| C  | 5.34710000  | -0.60960000 | 2.54520000 |
| C  | 1.38350000  | -2.74240000 | 3.26220000 |
| H  | 2.23020000  | -3.42900000 | 3.12880000 |
| H  | 0.52340000  | -3.29850000 | 3.65360000 |
| H  | 1.09060000  | -2.32180000 | 2.29360000 |
| C  | 2.46220000  | -2.37170000 | 5.87470000 |
| H  | 1.66230000  | -2.99490000 | 6.29260000 |
| H  | 3.30300000  | -3.00560000 | 5.55940000 |
| H  | 2.80150000  | -1.68270000 | 6.65680000 |
| C  | 2.38340000  | 5.50920000  | 3.17600000 |
| H  | 3.35760000  | 5.75160000  | 2.73140000 |
| H  | 1.62990000  | 5.47870000  | 2.38060000 |
| H  | 2.10040000  | 6.29680000  | 3.88620000 |
| C  | 3.88110000  | 4.12030000  | 5.16720000 |
| H  | 4.78910000  | 4.37760000  | 4.60720000 |
| H  | 3.65110000  | 4.93610000  | 5.86440000 |
| H  | 4.04450000  | 3.20810000  | 5.74910000 |
| H  | -2.43960000 | 1.40870000  | 7.61850000 |
| H  | -1.55050000 | 2.93840000  | 7.66840000 |
| H  | -0.58500000 | 1.29320000  | 9.24050000 |
| H  | -0.43880000 | 0.09190000  | 7.94750000 |
| H  | 1.74330000  | 0.97340000  | 8.49540000 |

|   |            |             |            |
|---|------------|-------------|------------|
| H | 1.22780000 | 2.64560000  | 8.24820000 |
| H | 1.25010000 | 1.64010000  | 2.08800000 |
| H | 2.75730000 | 0.79260000  | 0.02740000 |
| H | 5.22520000 | 1.89450000  | 0.28290000 |
| H | 5.21940000 | 3.43180000  | 2.49140000 |
| H | 3.59830000 | -1.79560000 | 1.80280000 |
| H | 6.07170000 | -0.72610000 | 1.74590000 |
| H | 6.38900000 | 0.75550000  | 3.99520000 |
| H | 4.08590000 | 0.60120000  | 5.41210000 |
| H | 0.46130000 | 2.34960000  | 3.83870000 |

---

### Species G

HF energy= -2968.99671748

No Imaginary frequency

Zero-point correction= 0.446685 (Hartree/Particle)

Thermal correction to Energy= 0.483109

Thermal correction to Enthalpy= 0.484053

Thermal correction to Gibbs Free Energy= 0.382396

Sum of electronic and zero-point Energies= -2968.550033

Sum of electronic and thermal Energies= -2968.513609

Sum of electronic and thermal Enthalpies= -2968.512664

Sum of electronic and thermal Free Energies= -2968.614321

### Coordinates: G

|    |             |             |             |
|----|-------------|-------------|-------------|
| Fe | 1.20130000  | -0.10920000 | 2.55960000  |
| Fe | -0.02960000 | 2.74070000  | 3.96010000  |
| Fe | 4.46540000  | 1.83670000  | 5.40320000  |
| P  | 3.21010000  | -0.88840000 | 3.29400000  |
| P  | 1.29750000  | 3.63770000  | 5.55030000  |
| S  | -0.64110000 | 1.38040000  | 2.12300000  |
| S  | 0.50250000  | 0.54420000  | 4.74770000  |
| O  | 0.13900000  | -2.85280000 | 2.25220000  |
| O  | 1.95780000  | 0.13980000  | -0.24940000 |
| O  | -2.55540000 | 3.13830000  | 5.45530000  |
| O  | -0.29080000 | 5.14420000  | 2.32120000  |
| C  | 0.45480000  | -1.75630000 | 2.43500000  |
| C  | 1.66410000  | -0.00690000 | 0.85560000  |
| C  | -1.58360000 | 2.91090000  | 4.87230000  |
| C  | -0.21680000 | 4.21390000  | 2.99810000  |
| C  | -2.19120000 | 0.55200000  | 2.71480000  |
| C  | -2.05140000 | -0.51060000 | 3.81730000  |
| C  | -1.17000000 | -0.20590000 | 5.04150000  |
| C  | 3.78780000  | 3.29660000  | 4.07140000  |
| C  | 3.10830000  | 3.44260000  | 5.33010000  |
| C  | 4.12620000  | 3.66590000  | 6.32510000  |
| C  | 5.39930000  | 3.66910000  | 5.68210000  |
| C  | 5.18830000  | 3.43970000  | 4.28790000  |
| C  | 4.66790000  | 0.40620000  | 6.90540000  |
| C  | 3.58950000  | 0.04750000  | 6.04660000  |
| C  | 4.09680000  | -0.11510000 | 4.70920000  |
| C  | 5.51000000  | 0.16160000  | 4.77050000  |
| C  | 5.85680000  | 0.47800000  | 6.11770000  |
| C  | 4.51160000  | -0.89730000 | 1.97850000  |
| H  | 5.43980000  | -1.36440000 | 2.32770000  |
| H  | 4.13800000  | -1.46630000 | 1.11960000  |
| H  | 4.71980000  | 0.12480000  | 1.64250000  |
| C  | 3.26240000  | -2.66100000 | 3.84810000  |
| H  | 2.94930000  | -3.31390000 | 3.02450000  |

|   |             |             |            |
|---|-------------|-------------|------------|
| H | 4.27080000  | -2.94440000 | 4.17400000 |
| H | 2.56580000  | -2.80370000 | 4.68220000 |
| C | 1.18280000  | 5.48070000  | 5.73950000 |
| H | 1.84390000  | 5.84470000  | 6.53570000 |
| H | 1.46350000  | 5.96750000  | 4.79860000 |
| H | 0.14720000  | 5.75640000  | 5.97430000 |
| C | 0.99330000  | 3.08420000  | 7.28890000 |
| H | 1.69270000  | 3.54420000  | 7.99730000 |
| H | -0.02740000 | 3.37120000  | 7.57030000 |
| H | 1.07460000  | 1.99450000  | 7.34750000 |
| H | -2.65410000 | 0.08210000  | 1.83730000 |
| H | -2.85360000 | 1.36660000  | 3.03000000 |
| H | -3.06440000 | -0.73240000 | 4.19240000 |
| H | -1.70460000 | -1.44050000 | 3.36000000 |
| H | -0.99880000 | -1.14560000 | 5.58290000 |
| H | -1.68350000 | 0.46950000  | 5.73500000 |
| H | 3.30530000  | 3.08780000  | 3.12570000 |
| H | 5.96000000  | 3.35040000  | 3.53150000 |
| H | 6.35870000  | 3.78370000  | 6.17470000 |
| H | 3.96300000  | 3.79570000  | 7.38880000 |
| H | 6.19790000  | 0.15840000  | 3.93400000 |
| H | 6.84290000  | 0.76160000  | 6.46830000 |
| H | 4.58980000  | 0.62100000  | 7.96540000 |
| H | 2.55260000  | -0.06300000 | 6.33290000 |
| H | 1.28290000  | 2.75640000  | 3.20890000 |
| H | 2.04100000  | 1.16470000  | 2.56550000 |

---

### Species H

HF energy= -2969.37677236

No Imaginary frequency

Zero-point correction= 0.456874 (Hartree/Particle)

Thermal correction to Energy= 0.494682

Thermal correction to Enthalpy= 0.495626

Thermal correction to Gibbs Free Energy= 0.390182

Sum of electronic and zero-point Energies= -2968.919898

Sum of electronic and thermal Energies= -2968.882090

Sum of electronic and thermal Enthalpies= -2968.881146

Sum of electronic and thermal Free Energies= -2968.986590

### Coordinates: H

|    |             |             |             |
|----|-------------|-------------|-------------|
| Fe | 1.23780000  | -0.04310000 | 2.49250000  |
| Fe | -0.00570000 | 2.74500000  | 3.91660000  |
| Fe | 4.46810000  | 1.85880000  | 5.35420000  |
| P  | 3.26730000  | -0.95130000 | 3.26970000  |
| P  | 1.28530000  | 3.66140000  | 5.56300000  |
| S  | -0.65530000 | 1.39500000  | 2.05700000  |
| S  | 0.54110000  | 0.53190000  | 4.68570000  |
| O  | 0.13170000  | -2.76020000 | 2.48020000  |
| O  | 1.68660000  | -0.29270000 | -0.43070000 |
| O  | -2.52200000 | 3.04870000  | 5.45610000  |
| O  | -0.42980000 | 5.21660000  | 2.39560000  |
| C  | 0.48810000  | -1.67310000 | 2.51320000  |
| C  | 1.54450000  | -0.21040000 | 0.69760000  |
| C  | -1.55960000 | 2.86590000  | 4.85600000  |
| C  | -0.29030000 | 4.26630000  | 3.02000000  |
| C  | -2.19910000 | 0.56770000  | 2.66670000  |
| C  | -2.05570000 | -0.49380000 | 3.76780000  |
| C  | -1.13580000 | -0.22640000 | 4.97240000  |

|   |             |             |            |
|---|-------------|-------------|------------|
| C | 3.81780000  | 3.42920000  | 4.12200000 |
| C | 3.09500000  | 3.46040000  | 5.36690000 |
| C | 4.08040000  | 3.60710000  | 6.40740000 |
| C | 5.37090000  | 3.67550000  | 5.80740000 |
| C | 5.20790000  | 3.56380000  | 4.39420000 |
| C | 4.77810000  | 0.39090000  | 6.80720000 |
| C | 3.67760000  | 0.02330000  | 5.98530000 |
| C | 4.14240000  | -0.09470000 | 4.62450000 |
| C | 5.54830000  | 0.23090000  | 4.63640000 |
| C | 5.93150000  | 0.52130000  | 5.97670000 |
| C | 4.53630000  | -1.09230000 | 1.93720000 |
| H | 5.44570000  | -1.57720000 | 2.31030000 |
| H | 4.13210000  | -1.69790000 | 1.11780000 |
| H | 4.79500000  | -0.10450000 | 1.53860000 |
| C | 3.16740000  | -2.67800000 | 3.91720000 |
| H | 2.84550000  | -3.36510000 | 3.12620000 |
| H | 4.15100000  | -2.99050000 | 4.28620000 |
| H | 2.44880000  | -2.72890000 | 4.74220000 |
| C | 1.13830000  | 5.49640000  | 5.74740000 |
| H | 1.77830000  | 5.86080000  | 6.55970000 |
| H | 1.43670000  | 5.99230000  | 4.81700000 |
| H | 0.09650000  | 5.76240000  | 5.96460000 |
| C | 0.93490000  | 3.07220000  | 7.27670000 |
| H | 1.58440000  | 3.56130000  | 8.01170000 |
| H | -0.10590000 | 3.31110000  | 7.52620000 |
| H | 1.06840000  | 1.98770000  | 7.33890000 |
| H | -2.67310000 | 0.10650000  | 1.79250000 |
| H | -2.84570000 | 1.39300000  | 2.98340000 |
| H | -3.06260000 | -0.67790000 | 4.17330000 |
| H | -1.76630000 | -1.43830000 | 3.30160000 |
| H | -0.95440000 | -1.17680000 | 5.48820000 |
| H | -1.61850000 | 0.43580000  | 5.69810000 |
| H | 3.37610000  | 3.34670000  | 3.13790000 |
| H | 6.00350000  | 3.55610000  | 3.65790000 |
| H | 6.31250000  | 3.75690000  | 6.33860000 |
| H | 3.88550000  | 3.64570000  | 7.47270000 |
| H | 6.20750000  | 0.25820000  | 3.77730000 |
| H | 6.92080000  | 0.82610000  | 6.29830000 |
| H | 4.73730000  | 0.57370000  | 7.87490000 |
| H | 2.66220000  | -0.14110000 | 6.31910000 |
| H | 1.32280000  | 2.88070000  | 3.16870000 |
| H | 1.81140000  | 1.65030000  | 2.66480000 |
| H | 2.37820000  | 1.18680000  | 2.31630000 |

---

### Species I

HF energy= -2968.79481877

No Imaginary frequency

Zero-point correction= 0.446567 (Hartree/Particle)

Thermal correction to Energy= 0.485019

Thermal correction to Enthalpy= 0.485963

Thermal correction to Gibbs Free Energy= 0.378223

Sum of electronic and zero-point Energies= -2968.348252

Sum of electronic and thermal Energies= -2968.309799

Sum of electronic and thermal Enthalpies= -2968.308855

Sum of electronic and thermal Free Energies= -2968.416596

### Coordinates: I

Fe -0.24180000 0.44660000 4.43690000

|    |             |             |            |
|----|-------------|-------------|------------|
| Fe | 0.39980000  | 3.45500000  | 4.67940000 |
| Fe | 4.29490000  | 0.92650000  | 3.47930000 |
| P  | 1.45120000  | -1.18350000 | 4.42510000 |
| P  | 2.65020000  | 3.95500000  | 4.49150000 |
| S  | -1.67980000 | 2.35060000  | 4.48270000 |
| S  | 0.81520000  | 1.65220000  | 6.20680000 |
| O  | -1.86640000 | -1.37850000 | 6.06040000 |
| O  | -1.71830000 | -0.48910000 | 2.03650000 |
| O  | -0.26400000 | 5.69850000  | 6.56040000 |
| O  | -0.16320000 | 4.87580000  | 2.16100000 |
| C  | -1.24660000 | -0.61540000 | 5.47550000 |
| C  | -1.13070000 | -0.14830000 | 2.95180000 |
| C  | 0.00190000  | 4.85160000  | 5.82950000 |
| C  | 0.06700000  | 4.31860000  | 3.14140000 |
| C  | -2.47860000 | 2.54230000  | 6.15020000 |
| C  | -1.86620000 | 1.80850000  | 7.34550000 |
| C  | -0.36740000 | 1.97570000  | 7.60710000 |
| C  | 3.22960000  | 2.21970000  | 2.22170000 |
| C  | 3.68810000  | 2.92430000  | 3.39150000 |
| C  | 5.12440000  | 2.82160000  | 3.39310000 |
| C  | 5.52870000  | 2.06950000  | 2.25230000 |
| C  | 4.35730000  | 1.69530000  | 1.52940000 |
| C  | 5.29960000  | -0.01670000 | 5.04420000 |
| C  | 3.90950000  | 0.06000000  | 5.33790000 |
| C  | 3.18990000  | -0.65240000 | 4.31140000 |
| C  | 4.17050000  | -1.14930000 | 3.37700000 |
| C  | 5.46090000  | -0.75910000 | 3.83540000 |
| C  | 1.26360000  | -2.40910000 | 3.06030000 |
| H  | 2.02260000  | -3.19640000 | 3.13460000 |
| H  | 0.27290000  | -2.87380000 | 3.12700000 |
| H  | 1.34870000  | -1.92150000 | 2.08240000 |
| C  | 1.46920000  | -2.24230000 | 5.93700000 |
| H  | 0.54180000  | -2.82150000 | 6.01070000 |
| H  | 2.31980000  | -2.93230000 | 5.89300000 |
| H  | 1.56640000  | -1.61300000 | 6.82820000 |
| C  | 2.98550000  | 5.64970000  | 3.82510000 |
| H  | 4.06160000  | 5.86000000  | 3.82520000 |
| H  | 2.61120000  | 5.73700000  | 2.79950000 |
| H  | 2.47450000  | 6.39590000  | 4.44530000 |
| C  | 3.57270000  | 4.00520000  | 6.09090000 |
| H  | 4.62170000  | 4.28670000  | 5.94140000 |
| H  | 3.10430000  | 4.75680000  | 6.73770000 |
| H  | 3.52110000  | 3.03730000  | 6.59700000 |
| H  | -3.51770000 | 2.21820000  | 6.02250000 |
| H  | -2.49340000 | 3.62530000  | 6.31760000 |
| H  | -2.38820000 | 2.17290000  | 8.24450000 |
| H  | -2.11070000 | 0.74500000  | 7.28750000 |
| H  | -0.06900000 | 1.30190000  | 8.41820000 |
| H  | -0.13850000 | 2.99680000  | 7.93140000 |
| H  | 2.20220000  | 2.12960000  | 1.89190000 |
| H  | 4.32760000  | 1.09970000  | 0.62420000 |
| H  | 6.54770000  | 1.79740000  | 2.00140000 |
| H  | 5.79290000  | 3.22380000  | 4.14540000 |
| H  | 3.96880000  | -1.71850000 | 2.47740000 |
| H  | 6.39780000  | -0.96070000 | 3.32910000 |
| H  | 6.09470000  | 0.44270000  | 5.62000000 |
| H  | 3.46110000  | 0.55540000  | 6.18960000 |
| H  | 0.61680000  | 1.69980000  | 3.51180000 |
| H  | 0.94460000  | 0.98830000  | 3.32700000 |



---

**Species J**

HF energy= -2969.37677236  
No Imaginary frequency  
Zero-point correction= 0.456874 (Hartree/Particle)  
Thermal correction to Energy= 0.494682  
Thermal correction to Enthalpy= 0.495626  
Thermal correction to Gibbs Free Energy= 0.390182  
Sum of electronic and zero-point Energies= -2968.919898  
Sum of electronic and thermal Energies= -2968.882090  
Sum of electronic and thermal Enthalpies= -2968.881146  
Sum of electronic and thermal Free Energies= -2968.986590

**Coordinates: J**

|    |             |             |            |
|----|-------------|-------------|------------|
| Fe | 0.14610000  | 0.08600000  | 5.32590000 |
| Fe | 0.33830000  | 2.82570000  | 5.06010000 |
| Fe | 4.06400000  | 0.81550000  | 2.65560000 |
| P  | 1.76580000  | -1.41980000 | 4.42720000 |
| P  | 2.18260000  | 3.71280000  | 3.81360000 |
| S  | -1.35410000 | 1.71670000  | 6.17510000 |
| S  | 1.77210000  | 1.53300000  | 6.26190000 |
| O  | -2.23410000 | -1.58740000 | 4.63270000 |
| O  | -0.11850000 | 0.83670000  | 2.49630000 |
| O  | 0.30600000  | 5.18130000  | 6.78810000 |
| O  | -1.63910000 | 3.99550000  | 3.15250000 |
| C  | -1.31730000 | -0.96620000 | 4.87450000 |
| C  | 0.06040000  | 0.73610000  | 3.62300000 |
| C  | 0.32420000  | 4.28310000  | 6.08510000 |
| C  | -0.88080000 | 3.54650000  | 3.86930000 |
| C  | -1.14390000 | 1.90900000  | 8.01440000 |
| C  | 0.09000000  | 1.28470000  | 8.65970000 |
| C  | 1.45010000  | 1.69550000  | 8.09530000 |
| C  | 2.69960000  | 1.94920000  | 1.53980000 |
| C  | 3.17960000  | 2.70680000  | 2.67180000 |
| C  | 4.61250000  | 2.81000000  | 2.52300000 |
| C  | 4.98830000  | 2.13710000  | 1.32780000 |
| C  | 3.81050000  | 1.60820000  | 0.72350000 |
| C  | 5.55900000  | -0.14740000 | 3.77050000 |
| C  | 4.35100000  | -0.09300000 | 4.51440000 |
| C  | 3.32910000  | -0.79390000 | 3.76810000 |
| C  | 3.94720000  | -1.25830000 | 2.54540000 |
| C  | 5.31140000  | -0.86030000 | 2.55990000 |
| C  | 1.06100000  | -2.47640000 | 3.09520000 |
| H  | 1.79350000  | -3.23730000 | 2.80300000 |
| H  | 0.16580000  | -2.99220000 | 3.46060000 |
| H  | 0.79230000  | -1.88580000 | 2.21280000 |
| C  | 2.28920000  | -2.64010000 | 5.71120000 |
| H  | 1.42640000  | -3.20820000 | 6.08130000 |
| H  | 3.00830000  | -3.34010000 | 5.26880000 |
| H  | 2.77590000  | -2.12890000 | 6.54960000 |
| C  | 1.68650000  | 5.14750000  | 2.76040000 |
| H  | 2.57990000  | 5.61040000  | 2.32480000 |
| H  | 1.03470000  | 4.82030000  | 1.94280000 |
| H  | 1.15490000  | 5.89830000  | 3.35790000 |
| C  | 3.42210000  | 4.44970000  | 4.96140000 |
| H  | 4.18990000  | 4.98470000  | 4.39210000 |
| H  | 2.93680000  | 5.17190000  | 5.62660000 |
| H  | 3.89570000  | 3.67260000  | 5.56970000 |
| H  | -2.05360000 | 1.47650000  | 8.44480000 |

|   |            |            |            |
|---|------------|------------|------------|
| H | -1.1870000 | 2.9900000  | 8.1898000  |
| H | 0.0840000  | 1.5784000  | 9.7207000  |
| H | -0.0060000 | 0.1912000  | 8.6777000  |
| H | 2.2425000  | 1.1069000  | 8.5705000  |
| H | 1.6617000  | 2.7495000  | 8.3103000  |
| H | 1.6715000  | 1.7019000  | 1.3157000  |
| H | 3.7695000  | 1.0175000  | -0.1846000 |
| H | 6.0025000  | 2.0164000  | 0.9646000  |
| H | 5.2975000  | 3.2991000  | 3.2045000  |
| H | 3.4637000  | -1.8085000 | 1.7473000  |
| H | 6.0269000  | -1.0364000 | 1.7650000  |
| H | 6.4984000  | 0.3113000  | 4.0571000  |
| H | 4.2254000  | 0.3827000  | 5.4778000  |
| H | 0.4966000  | -1.0037000 | 6.5716000  |
| H | -0.0604000 | -0.5421000 | 6.9011000  |

---

### Species K

HF energy= -2968.46828470

No Imaginary frequency

Zero-point correction= 0.448775 (Hartree/Particle)

Thermal correction to Energy= 0.486935

Thermal correction to Enthalpy= 0.487880

Thermal correction to Gibbs Free Energy= 0.381897

Sum of electronic and zero-point Energies= -2968.019510

Sum of electronic and thermal Energies= -2967.981349

Sum of electronic and thermal Enthalpies= -2967.980405

Sum of electronic and thermal Free Energies= -2968.086388

### Coordinates: K

|    |            |            |           |
|----|------------|------------|-----------|
| Fe | 0.1954000  | 0.2568000  | 5.0370000 |
| Fe | 0.3982000  | 2.8841000  | 4.8559000 |
| Fe | 4.1247000  | 0.8653000  | 2.4355000 |
| P  | 1.7783000  | -1.2419000 | 4.2542000 |
| P  | 2.2569000  | 3.7150000  | 3.6364000 |
| S  | -1.3249000 | 1.7993000  | 5.9418000 |
| S  | 1.7914000  | 1.5724000  | 6.0931000 |
| O  | -1.9901000 | -1.6809000 | 4.8539000 |
| O  | -0.3003000 | 0.9353000  | 2.2287000 |
| O  | 0.4152000  | 5.1748000  | 6.6607000 |
| O  | -1.5471000 | 4.0981000  | 2.9700000 |
| C  | -1.1361000 | -0.9187000 | 4.8752000 |
| C  | -0.0317000 | 0.8766000  | 3.3522000 |
| C  | 0.4173000  | 4.2967000  | 5.9241000 |
| C  | -0.7933000 | 3.6209000  | 3.6810000 |
| C  | -1.1388000 | 1.9036000  | 7.7818000 |
| C  | 0.0644000  | 1.1932000  | 8.3929000 |
| C  | 1.4284000  | 1.6778000  | 7.9115000 |
| C  | 2.6711000  | 1.9230000  | 1.3679000 |
| C  | 3.2080000  | 2.7366000  | 2.4298000 |
| C  | 4.6253000  | 2.8584000  | 2.1841000 |
| C  | 4.9393000  | 2.1354000  | 0.9986000 |
| C  | 3.7346000  | 1.5602000  | 0.4964000 |
| C  | 5.6180000  | -0.0068000 | 3.6087000 |
| C  | 4.3958000  | 0.0447000  | 4.3347000 |
| C  | 3.4019000  | -0.7089000 | 3.6107000 |
| C  | 4.0458000  | -1.2103000 | 2.4217000 |
| C  | 5.4027000  | -0.7778000 | 2.4276000 |
| C  | 1.1326000  | -2.3333000 | 2.9124000 |

|   |             |             |             |
|---|-------------|-------------|-------------|
| H | 1.85640000  | -3.11780000 | 2.66450000  |
| H | 0.20760000  | -2.81460000 | 3.24900000  |
| H | 0.90800000  | -1.75230000 | 2.01100000  |
| C | 2.27230000  | -2.45480000 | 5.55560000  |
| H | 1.38390000  | -2.98190000 | 5.92230000  |
| H | 2.98870000  | -3.18010000 | 5.15200000  |
| H | 2.73370000  | -1.92570000 | 6.39630000  |
| C | 1.81960000  | 5.21560000  | 2.64380000  |
| H | 2.72330000  | 5.65860000  | 2.20930000  |
| H | 1.13800000  | 4.94740000  | 1.82900000  |
| H | 1.32730000  | 5.96080000  | 3.28070000  |
| C | 3.55130000  | 4.37160000  | 4.77680000  |
| H | 4.32900000  | 4.90270000  | 4.21730000  |
| H | 3.09690000  | 5.07790000  | 5.48020000  |
| H | 4.00220000  | 3.55420000  | 5.34750000  |
| H | -2.06680000 | 1.47300000  | 8.17520000  |
| H | -1.14700000 | 2.97140000  | 8.03220000  |
| H | 0.02470000  | 1.34590000  | 9.48290000  |
| H | -0.02210000 | 0.11340000  | 8.22620000  |
| H | 2.22030000  | 1.08510000  | 8.38410000  |
| H | 1.60020000  | 2.72500000  | 8.18940000  |
| H | 1.63690000  | 1.63820000  | 1.23860000  |
| H | 3.64650000  | 0.92520000  | -0.37770000 |
| H | 5.93110000  | 2.01050000  | 0.57900000  |
| H | 5.34150000  | 3.38590000  | 2.80180000  |
| H | 3.58020000  | -1.79950000 | 1.64120000  |
| H | 6.13030000  | -0.96890000 | 1.64710000  |
| H | 6.54110000  | 0.48930000  | 3.88620000  |
| H | 4.23530000  | 0.56480000  | 5.26940000  |
| H | 0.26420000  | -0.60720000 | 6.28210000  |
